# Supplementary material for: Mannich reaction of trifluoroacetaldehyde hydrazones: a useful entry to trifluoromethyl substituted heterocycles
Source: Royal Society of Chemistry journal article supplement (doi:10.1039/c7ob02840g), 2018-01-01

# Mannich reaction of trifluoroacetaldehyde hydrazones, a useful entry to trifluoromethyl substituted heterocycles

Shuanglong Jia,<sup>a</sup> Laurent El Kaïm<sup>a\*</sup>

*Laboratoire Chimie et Procédés, Ecole Nationale Supérieure de Techniques Avancées  
ENSTA ParisTech, UMR 7652, Université Paris-Saclay, 828 Bd des Maréchaux, 91128  
Palaiseau (France). E-mail: elkaïm@ensta.fr; Fax: +33 1 45 52 83 22*

## Supporting Information

### Table of Contents

|                                                                             |    |
|-----------------------------------------------------------------------------|----|
| 1 General Considerations .....                                              | 2  |
| 2 General Procedure .....                                                   | 2  |
| 2.1 Synthesis of hydrazones .....                                           | 2  |
| 2.2 General procedure for the formation of Mannich adducts.....             | 4  |
| 2.3 General procedure for the formation of dihydropyridazine derivatives. . | 4  |
| 2.4 Optimization table for the preparation of dihydropyridazines.....       | 4  |
| 3 Characterization Data.....                                                | 5  |
| 4 <sup>1</sup> H NMR and <sup>13</sup> C NMR Spectra of All Compounds ..... | 27 |

## 1 General Considerations

NMR spectra were recorded at 298 K using a Bruker AVANCE 400 spectrometer.  $^1\text{H}$  NMR spectra were recorded at 400 MHz and residual solvent peaks were used as an internal reference ( $\text{CDCl}_3$   $\delta$  7.26). Data are reported as follows: chemical shift in ppm, apparent multiplicity (s = singlet, d = doublet, t = triplet, q = quartet, p = pentet, m = multiplet or overlap of nonequivalent resonances), coupling constants, integration.  $^{13}\text{C}$  NMR spectra were recorded at 100 MHz and residual solvent peaks were used as an internal reference ( $\text{CHCl}_3$   $\delta$  77.16). Data are reported as follows: chemical shift in ppm, multiplicity deduced from DEPT experiments ( $\text{CH}_3$ ,  $\text{CH}_2$ ,  $\text{CH}$ , Cq), apparent multiplicity, coupling constants and integration where relevant. Analytical TLC was performed with Merck silica gel plates, pre-coated with silica gel 60 F254 (0.2 mm). Visualisation was effected by quenching of UV fluorescence ( $\lambda_{\text{max}}$  = 254 nm or 360 nm) and by staining with p-anisaldehyde, potassium permanganate or vanillin TLC stain solutions, followed by heating. Flash chromatography employed VWR (230–400 mesh) silica gel. Reactions were conducted under a positive pressure of dry nitrogen or argon in oven-dried or flame dried glassware, and at ambient room temperature, unless specified otherwise. Anhydrous solvents were either obtained from commercial sources or dried with a MBRAUN Solvent Purification System SPS-800. Petroleum ether refers to the 40–60 °C boiling fraction. Commercially available chemicals were used as purchased, or where specified, purified by standard techniques. IR spectra were recorded on a Perkin Elmer Spectrum 65 FT-IR Spectrometer. Melting points were measured on a Stuart SMP3 melting point apparatus and are uncorrected. High resolution mass spectra were recorded on an Agilent 1100 series LC-MS (with a 6310 ion trap) under electrospray ionization (ESI). For compounds containing bromine, the mass of  $^{79}\text{Br}$  was used.

## 2 General Procedure

### 2.1 Synthesis of hydrazones

Trifluoroacetaldehyde 4-nitrophenylhydrazone

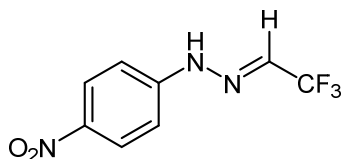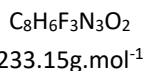

Trifluoroacetaldehyde 4-nitrophenylhydrazone was prepared by dissolving 4-nitrophenylhydrazine (380mg, 2.5mmol) in water (10ml) containing concentrated hydrochloric acid ( $d = 1.18$ , 0.2ml). Ethyl trifluoroacetaldehyde hemiacetal (0.4ml, 5mmol) was added and the solution was heated at 45°C for 10 min, it was then kept at room temperature for 1.5h during which time trifluoroacetaldehyde 4-nitrophenylhydrazone separated as fine yellow solid (525mg, 90%, 210.1°C–212.5°C). The spectra data

are in agreement with the literature report.<sup>[1]</sup>

**<sup>1</sup>H NMR (400 MHz, DMSO)**  $\delta$  11.80(s, 1H), 8.19 (d,  $J$  = 9.2 Hz, 2H), 7.54 (q,  $J$  = 4.3 Hz, 1H), 7.19 (d,  $J$  = 9.2 Hz, 2H)

**<sup>13</sup>C NMR (101 MHz, DMSO)**  $\delta$  149.2, 140.5, 126.8(q,  $J$  = 37 Hz), 126.1, 121.2(q,  $J$  = 267 Hz), 112.5.

Trifluoroacetaldehyde phenylhydrazone

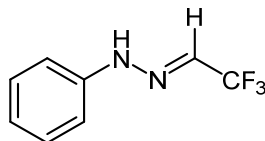

$C_8H_7F_3N_2$

188.15 g.mol<sup>-1</sup>

Trifluoroacetaldehyde phenylhydrazone was prepared by dissolving phenylhydrazine (271mg, 2.5mmol) in water (10ml) containing concentrated hydrochloric acid ( $d$  = 1.18, 0.2ml). Ethyl trifluoroacetaldehyde hemiacetal (0.4ml, 5mmol) was added and the solution was heated at 45°C for 10 min, it was then kept at room temperature for 1.5h during which time trifluoroacetaldehyde phenylhydrazone separated as fine yellow solid (385mg, 82%, 68.2°C-69.8°C). The spectra data are in agreement with the literature report.<sup>[1]</sup>

**<sup>1</sup>H NMR (400 MHz, CDCl<sub>3</sub>)**  $\delta$  7.83 (s, 1H), 7.24-7.20 (m, 2H), 7.01-6.98 (m, 2H), 6.94 – 6.87 (m, 1H), 6.87 – 6.79 (m, 1H).

**<sup>13</sup>C NMR (101 MHz, CDCl<sub>3</sub>)**  $\delta$  142.7, 129.6, 122.4(q,  $J$  = 39 Hz), 122.3, 121.2(q,  $J$  = 268 Hz), 113.6

Trifluoroacetaldehyde 4-methylphenylhydrazone

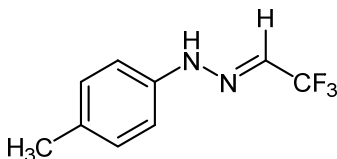

$C_9H_9F_3N_2$

202.18 g.mol<sup>-1</sup>

Trifluoroacetaldehyde 4-methylphenylhydrazone was prepared by dissolving 4-methylphenylhydrazine (306mg, 2.5mmol) in water (10ml) containing concentrated hydrochloric acid ( $d$  = 1.18, 0.2ml). Ethyl trifluoroacetaldehyde hemiacetal (0.4ml, 5mmol) was added and the solution was heated at 45°C for 10 min, it was then kept at room temperature for 1.5h during which time trifluoroacetaldehyde 4-methylphenylhydrazone separated as fine yellow solid (355mg, 70%, 89.7°C-90.6°C). The spectra data are in agreement with the literature report.<sup>[1]</sup>

**<sup>1</sup>H NMR (400 MHz, CDCl<sub>3</sub>)**  $\delta$  7.90 (s, 1H), 7.15-7.13 (m, 2H), 7.04-6.98 (m, 2H), 6.90 (q,  $J$  = 4.1 Hz, 1H), 2.34(s, 3H).

**<sup>13</sup>C NMR (101 MHz, CDCl<sub>3</sub>)**  $\delta$  140.3, 131.7, 129.9, 121.7(q,  $J$  = 39 Hz), 121.2(q,  $J$  = 268 Hz), 113.6, 20.6.

(E)-2-(2-(2,2,2-trifluoroethylidene)hydrazinyl)pyridine

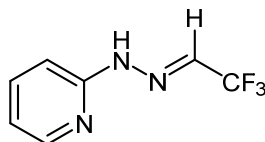

$C_7H_6F_3N_3$

189.14 g.mol<sup>-1</sup>

A solution of 2-bromopyridine (1.42g, 9mmol) and hydrazine hydrate (20mmol) was placed in a three-necked flask fitted with mechanical stir, a dropping funnel and thermometer. The reaction mixture was stirred at reflux for 4h under an inert atmosphere of N<sub>2</sub>. The reaction mixture was next extracted at room temperature with Et<sub>2</sub>O (3×50ml). The organic layer was evaporated under reduced pressure to provide, in 50% yield, the 2-hydrazinepyridye as a white oil (850mg, 50%).<sup>[2]</sup>

2-hydrazinepyridye (1mmol) was added to a solution of ethyl trifluoroacetaldehyde hemiacetal (1.25mmol) in EtOH (2ml). The stirred mixture was heated to reflux for 10h under Ar. After completion of present reaction, the reaction mixture was concentrated under vacuum. The residue was washed by n-hexane (3×5ml) to afford a white solid (170mg, 90%, 159.6°C-161.9°C).

**<sup>1</sup>H NMR (400 MHz, CDCl<sub>3</sub>)** δ 9.99 (s, 1H), 8.16 (d, *J* = 4.9 Hz, 1H), 7.79 – 7.67 (m, 1H), 7.42 (d, *J* = 8.4 Hz, 1H), 7.13 (q, *J* = 3.9 Hz, 1H), 7.02 – 6.92 (m, 1H).

**<sup>13</sup>C NMR (101 MHz, CDCl<sub>3</sub>)** δ 156.1, 146.4, 139.2, 124.9(*q*, *J* = 39 Hz), 120.9(*q*, *J* = 268 Hz), 117.7, 108.7.

**HRMS:** calculated for C<sub>13</sub>H<sub>15</sub>F<sub>3</sub>N<sub>4</sub>O<sub>3</sub>: 189.0514, found: 189.0510

**I.R.(thin film):** 3334,1626,1599, 1580, 1519, 1446, 1354, 1301, 1290, 1266, 1136, 1092cm<sup>-1</sup>.

## 2.2 General procedure for the formation of Mannich adducts

Hydrazone (0.5mmol) was added to a solution of secondary amine (0.5mmol) and aldehyde (0.5mmol) in 3ml toluene. The stirred mixture was heated to reflux under Ar for 12h. After completion of present reaction, the reaction mixture was concentrated under vacuum. The residue was purified by column chromatography on silica gel to afford the desired product.

## 2.3 General procedure for the formation of dihydropyridazine derivatives.

Mannich adduct (0.5mmol) was dissolved in 3mL diketone, and the stirred mixture was heated to 130°C under Ar for 12h. After completion of present reaction, the reaction mixture was concentrated under vacuum. The residue was purified by column chromatography on silica gel to afford the desired product. 4b was dissolved in 3ml acetone and the mixture was heated to 130°C under microwave condition for 1h.

## References:

[1] Wojciechowska, A.; Jasiński, M.; Kaszyński, P. *Tetrahedron*, **2015**, 71, 2349 – 2356.

[2] Todeschini, Adriane R.; Barreiro, Eliezer J. *European Journal of Medicinal Chemistry*, **1998**, 33, 189 – 199.

## 2.4 Optimization table for the preparation of dihydropyridazine derivatives.

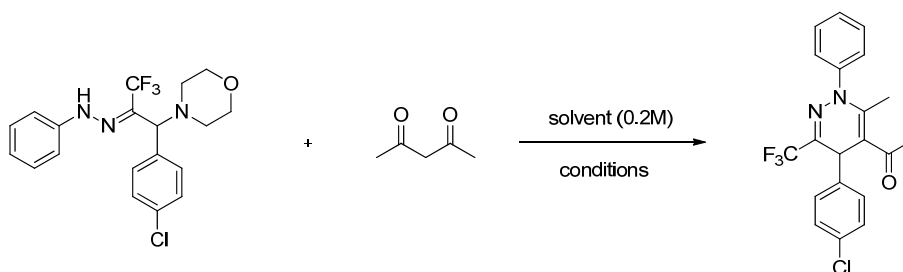

|                                                                      |             |
|----------------------------------------------------------------------|-------------|
| neat, 110°C, 12h                                                     | 45%         |
| neat, 130°C, 12h                                                     | 71%         |
| neat, 150°C, 6h                                                      | 55%         |
| DMF, 2eq. diketone, 130°C, 12h                                       | 26%         |
| toluene, 2eq. diketone, M.W. 150°C, 20min                            | no reaction |
| DMF, 2eq. diketone, Zn(OTf) <sub>2</sub> , 20mol%, M.W. 150°C, 20min | no reaction |

## 3 Characterization Data

Spectroscopic Data of All Compounds

Compound **4a**

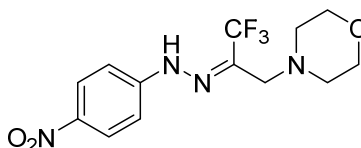

C<sub>13</sub>H<sub>15</sub>F<sub>3</sub>N<sub>4</sub>O<sub>3</sub>

332.28g.mol<sup>-1</sup>

Trifluoroacetaldehyde 4-nitrophenylhydrazone (0.5mmol, 117mg, 1.0eq) was added to a solution of morpholine (0.5mmol, 44mg, 1.0eq) and formaldehyde (0.5mmol, 41mg, 37%, 1.0eq) in 3ml toluene. The stirred mixture was heated to reflux under Ar for 12h. After completion of present reaction, the reaction mixture was concentrated under vacuum. The residue was purified by column chromatography on silica gel (eluent: Et<sub>2</sub>O:PE=50:50) to afford the desired product **4a** (94%, 156mg).

**Aspect:** light yellow solid, m. p. 118.5-119.7 °C.

**Rf:** 0.43 (Et<sub>2</sub>O:PE=50:50)

**<sup>1</sup>H NMR (400 MHz, CDCl<sub>3</sub>)** δ 11.72 (s, 1H), 8.18 (d, *J* = 9.2 Hz, 2H), 7.12 (d, *J* = 9.2 Hz, 2H), 3.76 (bs, 4H), 3.52 (s, 2H), 2.55 (bs, 4H).

**<sup>13</sup>C NMR (101 MHz, CDCl<sub>3</sub>)** δ 148.7, 141.9, 130.8(q, *J* = 34 Hz), 126.1, 121.2(q, *J* = 271 Hz), 112.8, 67.0, 54.8, 52.8.

**HRMS:** calculated for  $C_{13}H_{15}F_3N_4O_3$ : 332.1096, found: 332.1081

**I.R.(thin film):** 3689, 2838, 1595, 1511, 1377, 1338, 1325, 1258, 1207, 1124, 1111, 1052, 1005 $cm^{-1}$ .

Compound **4b**

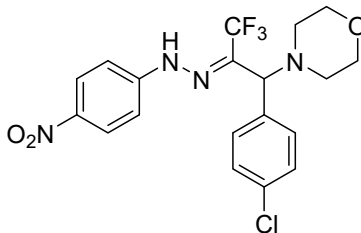

$C_{19}H_{18}ClF_3N_4O_3$

442.82g.mol<sup>-1</sup>

Trifluoroacetaldehyde 4-nitrophenylhydrazone (0.5mmol, 117mg, 1.0eq) was added to a solution of morpholine (0.5mmol, 44mg, 1.0eq) and p-chlorobenzaldehyde (0.5mmol, 70mg, 1.0eq) in 3ml toluene. The stirred mixture was heated to reflux under Ar for 12h. After completion of present reaction, the reaction mixture was concentrated under vacuum. The residue was purified by column chromatography on silica gel (eluent: Et<sub>2</sub>O:PE=60:40) to afford the desired product **4b** (99%, 220mg).

**Aspect:** light yellow solid, m. p. 88.2-90.1 °C.

**Rf:** 0.50 (Et<sub>2</sub>O:PE=60:40)

**<sup>1</sup>H NMR (400 MHz, CDCl<sub>3</sub>)** δ 12.61 (s, 1H), 8.22 (d, *J* = 9.2 Hz, 2H), 7.36-7.31 (m, 4H), 7.20 (d, *J* = 9.1 Hz, 2H), 4.22 (s, 1H), 3.74 (bs, 4H), 2.47 (bs, 4H).

**<sup>13</sup>C NMR (101 MHz, CDCl<sub>3</sub>)** δ 148.4, 142.0, 135.4, 133.4, 132.6(q, *J* = 33 Hz), 130.2, 129.8, 126.2, 121.3(q, *J* = 272 Hz), 112.8, 71.1, 67.1, 52.2.

**HRMS:** calculated for  $C_{19}H_{18}ClF_3N_4O_3$ : 442.1020, found: 442.1016

**I.R.(thin film):** 3691, 2973, 2853, 1595, 1511, 1494, 1337, 1256, 1209, 1159, 1122, 1112, 1016 $cm^{-1}$

Compound **4c**

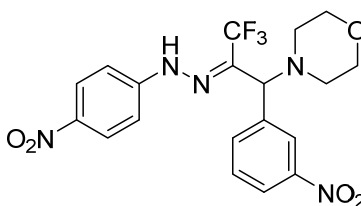

$C_{19}H_{18}F_3N_5O_5$

453.38g.mol<sup>-1</sup>

Trifluoroacetaldehyde 4-nitrophenylhydrazone (0.5mmol, 117mg, 1.0eq) was added to a solution of morpholine (0.5mmol, 44mg, 1.0eq) and 3-nitrobenzaldehyde (0.5mmol, 76mg, 1.0eq) in 3ml toluene. The stirred mixture was heated to reflux under Ar for 12h. After completion of present reaction, the reaction mixture was concentrated under vacuum. The residue was purified by column chromatography on silica gel (eluent: EA:PE=40:60) to afford the desired product **4c** (99%, 225mg).

**Aspect:** yellow solid, m. p. 155.1-156.6 °C.

**Rf:** 0.47 (EA:PE=40:60)

**<sup>1</sup>H NMR (400 MHz, CDCl<sub>3</sub>)** δ 12.46 (s, 1H), 8.30 – 8.20 (m, 4H), 7.76 (d, *J* = 7.8 Hz, 1H), 7.61 (t, *J* = 8.0 Hz, 1H), 7.27 – 7.20 (m, 2H), 4.39 (s, 1H), 3.91 – 3.64 (m, 4H), 2.65 – 2.41 (m, 4H).

**<sup>13</sup>C NMR (101 MHz, CDCl<sub>3</sub>)** δ 148.8, 148.1, 142.4, 137.0, 134.6, 131.2(q, *J* = 33 Hz), 130.8, 126.2, 124.4, 123.9, 123.7(q, *J* = 272 Hz), 113.1, 70.8, 67.0, 52.3.

**HRMS:** calculated for C<sub>19</sub>H<sub>18</sub>F<sub>3</sub>N<sub>5</sub>O<sub>5</sub>: 453.1260, found: 453.1252.

**I.R.(thin film):** 3692, 3094, 2973, 2854, 2258, 1595, 1536, 1513, 1351, 1338, 1257, 1249, 1210, 1160, 1123, 1123, 1112, 1035cm<sup>-1</sup>

Compound **4d**

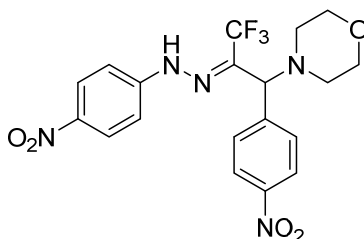

C<sub>19</sub>H<sub>18</sub>F<sub>3</sub>N<sub>5</sub>O<sub>5</sub>

453.38g.mol<sup>-1</sup>

Trifluoroacetaldehyde 4-nitrophenylhydrazone (0.5mmol, 117mg, 1.0eq) was added to a solution of morpholine (0.5mmol, 44mg, 1.0eq) and 3-nitrobenzaldehyde (0.5mmol, 76mg, 1.0eq) in 3ml toluene. The stirred mixture was heated to reflux under Ar for 12h. After completion of present reaction, the reaction mixture was concentrated under vacuum. The residue was purified by column chromatography on silica gel (eluent: EA:PE=20:80) to afford the desired product **4d** (99%, 224mg).

**Aspect:** yellow solid m.p. 123.5-124.6°C

**Rf:** 0.20 (EA:PE=20:80)

**<sup>1</sup>H NMR (400 MHz, CDCl<sub>3</sub>)** δ 12.51 (s, 1H), 8.25-8.21 (m, 4H), 7.61 (d, *J* = 8.7 Hz, 2H), 7.22 (d, *J* = 9.1 Hz, 2H), 4.38 (s, 1H), 3.90 – 3.67 (m, 4H), 2.63 – 2.41 (m, 4H).

**<sup>13</sup>C NMR (101 MHz, CDCl<sub>3</sub>)** δ 148.4, 148.1, 142.3, 142.0, 131.2(q, *J* = 33 Hz), 129.9, 126.2, 124.7, 121.2(q, *J* = 270 Hz), 113.0, 70.9, 67.0, 52.3.

**HRMS:** calculated for C<sub>19</sub>H<sub>18</sub>F<sub>3</sub>N<sub>5</sub>O<sub>5</sub>: 453.1260, found: 453.1269

**I.R.(thin film):** 2972, 2854, 1594, 1529, 1338, 1245, 1151, 1123, 1112, 1034cm<sup>-1</sup>

Compound **4e**

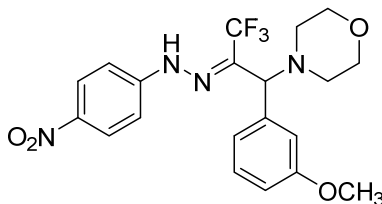

C<sub>20</sub>H<sub>21</sub>F<sub>3</sub>N<sub>4</sub>O<sub>4</sub>

438.41g.mol<sup>-1</sup>

Trifluoroacetaldehyde 4-nitrophenylhydrazone (0.5mmol, 117mg, 1.0eq) was added to a solution of morpholine (0.5mmol, 44mg, 1.0eq) and 3-methoxybenzaldehyde (0.5mmol, 68mg, 1.0eq) in 3ml toluene. The stirred mixture was heated to reflux under Ar for 12h. After completion of present reaction, the reaction mixture was concentrated under vacuum. The residue was purified by column chromatography on silica gel (eluent: Et<sub>2</sub>O:PE=50:50) to afford the desired product **4e** (99%, 216mg).

**Aspect:** yellow oil

**Rf:** 0.38 (Et<sub>2</sub>O:PE=50:50)

**<sup>1</sup>H NMR (400 MHz, CDCl<sub>3</sub>)** δ 12.67 (s, 1H), 8.22 (d, *J* = 9.2 Hz, 2H), 7.29 (t, *J* = 8.0 Hz, 1H), 7.22 – 7.15 (m, 2H), 7.00 – 6.86 (m, 3H), 4.20 (s, 1H), 3.77(s,3H), 3.75 (bs, 4H), 2.49 (bs, 4H).

**<sup>13</sup>C NMR (101 MHz, CDCl<sub>3</sub>)** δ 160.2, 148.5, 141.9, 136.4, 133.0(q, *J* = 32 Hz), 130.6, 126.2, 121.3(q, *J* = 273 Hz) 121.0, 115.3, 113.9, 112.7, 71.7, 67.2, 55.4, 52.2.

**HRMS:** calculated for C<sub>20</sub>H<sub>21</sub>F<sub>3</sub>N<sub>4</sub>O<sub>4</sub>: 438.1515, found: 438.1499.

**I.R.(thin film):** 3692, 3109, 2971, 2853, 2838, 1596, 1511, 1455, 1336, 1255, 1209, 1159, 1122, 1034cm<sup>-1</sup>

Compound **4f**

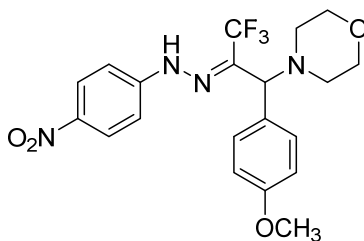

C<sub>20</sub>H<sub>21</sub>F<sub>3</sub>N<sub>4</sub>O<sub>4</sub>

438.41g.mol<sup>-1</sup>

Trifluoroacetaldehyde 4-nitrophenylhydrazone (0.5mmol, 117mg, 1.0eq) was added to a solution of morpholine (0.5mmol, 44mg, 1.0eq) and 3-methoxybenzaldehyde (0.5mmol, 68mg, 1.0eq) in 3ml toluene. The stirred mixture was heated to reflux under Ar for 12h. After completion of present reaction, the reaction mixture was concentrated under vacuum. The residue was purified by column chromatography on silica gel (eluent: Et<sub>2</sub>O:PE=50:50) to afford the desired product **4f** (82%, 179mg).

**Aspect:** light yellow solid, m. p. 189.9-192.1 °C.

**Rf:** 0.35 (Et<sub>2</sub>O:PE=50:50)

**<sup>1</sup>H NMR (400 MHz, CDCl<sub>3</sub>)** δ 12.75 (s, 1H), 8.22 (d, *J* = 9.2 Hz, 2H), 7.29-7.18 (m, 4H), 6.88 (d, *J* = 8.8 Hz, 2H), 4.19 (s, 1H), 3.79 (s, 3H), 3.75(bs, 4H), 2.47 (bs, 4H).

**<sup>13</sup>C NMR (101 MHz, CDCl<sub>3</sub>)** δ 160.3, 148.6, 141.7, 133.7(q, *J* = 32 Hz), 130.2, 126.8, 126.2, 121.3(q, *J* = 273 Hz), 114.8, 112.7, 71.2, 67.2, 55.4, 52.1.

**HRMS:** calculated for C<sub>20</sub>H<sub>21</sub>F<sub>3</sub>N<sub>4</sub>O<sub>4</sub>: 438.1515, found: 438.1520.

**I.R.(thin film):** 3689, 2971, 2853, 2839, 1596, 1513, 1457, 1336, 1255, 1207, 1157, 1112, 1034cm<sup>-1</sup>



Compound **4g**

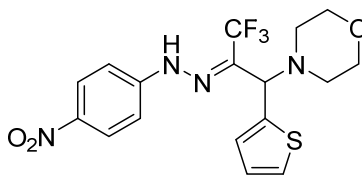

$C_{17}H_{17}F_3N_4O_3S$

414.40g.mol<sup>-1</sup>

Trifluoroacetaldehyde 4-nitrophenylhydrazone (0.5mmol, 117mg, 1.0eq) was added to a solution of morpholine (0.5mmol, 44mg, 1.0eq) and thiophene-2-carbaldehyde (0.5mmol, 57mg, 1.0eq) in 3ml toluene. The stirred mixture was heated to reflux under Ar for 15h. After completion of present reaction, the reaction mixture was concentrated under vacuum. The residue was purified by column chromatography on silica gel (eluent: Et<sub>2</sub>O:PE=50:50) to afford the desired product **4g** (48%, 100mg).

**Aspect:** black solid, m. p. 135.1-137.2 °C.

**Rf:** 0.5 (Et<sub>2</sub>O:PE=50:50)

**<sup>1</sup>H NMR (400 MHz, CDCl<sub>3</sub>)** δ 12.14 (s, 1H), 8.26 – 8.19 (m, 2H), 7.30 (dd, *J* = 4.2, 0.7 Hz, 1H), 7.22 – 7.16 (m, 2H), 7.12 (dd, *J* = 3.5, 1.0 Hz, 1H), 6.99 (dd, *J* = 5.1, 3.6 Hz, 1H), 4.59 (s, 1H), 3.75 (bs, 4H), 2.65 – 2.36 (m, 4H).

**<sup>13</sup>C NMR (101 MHz, CDCl<sub>3</sub>)** δ 148.2, 142.1, 136.2, 131.8(q, *J* = 33 Hz), 129.6, 127.2, 127.0, 126.2, 121.3(q, *J* = 272 Hz), 112.9, 67.2, 65.5, 51.9.

**HRMS:** calculated for  $C_{17}H_{17}F_3N_4O_3S$ : 414.0973, found: 414.0974.

**I.R.(thin film):** 3689, 1596, 1511, 1337, 1254, 1210, 1160, 1112, 1032cm<sup>-1</sup>

Compound **4h**

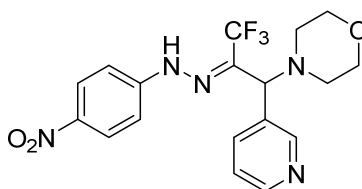

$C_{18}H_{18}F_3N_5O_3$

409.37g.mol<sup>-1</sup>

Trifluoroacetaldehyde 4-nitrophenylhydrazone (0.5mmol, 117mg, 1.0eq) was added to a solution of morpholine (0.5mmol, 44mg, 1.0eq) and nicotinaldehyde (0.5mmol, 54mg, 1.0eq) in 3ml toluene. The stirred mixture was heated to reflux under Ar for 15h. After completion of present reaction, the reaction mixture was concentrated under vacuum. The residue was purified by column chromatography on silica gel (eluent: Et<sub>2</sub>O:PE=50:50) to afford the desired product **4h** (99%, 201mg).

**Aspect:** white solid, m. p. 182.6-183.4 °C.

**Rf:** 0.45 (Et<sub>2</sub>O:PE=50:50)

**<sup>1</sup>H NMR (400 MHz, CDCl<sub>3</sub>)** δ 12.52 (s, 1H), 8.71 – 8.58 (m, 2H), 8.20 (d, *J* = 9.1 Hz, 2H), 7.73 (dd, *J* = 7.9, 1.6 Hz, 1H), 7.33 (dd, *J* = 7.9, 4.8 Hz, 1H), 7.25 – 7.15 (m, 2H), 4.28 (s, 1H), 3.76 (bs, 4H), 2.49 (bs, 4H).

**<sup>13</sup>C NMR (101 MHz, CDCl<sub>3</sub>)** δ 150.7, 150.1, 148.2, 142.1, 136.1, 131.8(q, *J* = 33 Hz), 131.0, 126.1, 124.3, 121.1(q, *J* = 272 Hz)112.9, 69.1, 66.9, 52.2.

**HRMS:** calculated for C<sub>18</sub>H<sub>18</sub>F<sub>3</sub>N<sub>5</sub>O<sub>3</sub>: 409.1362, found: 409.1373.

**I.R.(thin film):** 3689, 3039, 2973, 2916, 2895, 2854, 2836, 2768, 2446, 2233, 1595, 1513, 1456, 1337, 1264, 1209, 1159, 1123, 1112, 1035cm<sup>-1</sup>

#### Compound 4i

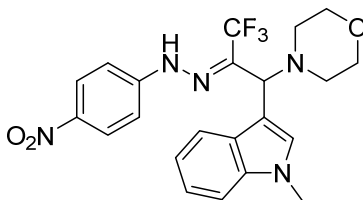

C<sub>22</sub>H<sub>22</sub>F<sub>3</sub>N<sub>5</sub>O<sub>3</sub>

461.45g.mol<sup>-1</sup>

Trifluoroacetaldehyde 4-nitrophenylhydrazone (0.5mmol, 117mg, 1.0eq) was added to a solution of morpholine (0.5mmol, 44mg, 1.0eq) and 1-methyl-1*H*-indole-3-carbaldehyde (0.5mmol, 80mg, 1.0eq) in 3ml toluene. The stirred mixture was heated to reflux under Ar for 15h. After completion of present reaction, the reaction mixture was concentrated under vacuum. The residue was purified by column chromatography on silica gel (eluent: Et<sub>2</sub>O:PE=50:50) to afford the desired product **4i** (58%, 133mg).

**Aspect:** gray solid, m. p. 178.1-180.0 °C.

**R<sub>f</sub>:** 0.42 (Et<sub>2</sub>O:PE=50:50)

**<sup>1</sup>H NMR (400 MHz, CDCl<sub>3</sub>)** δ 12.75 (s, 1H), 8.24 (d, *J* = 9.0 Hz, 2H), 7.63 (d, *J* = 7.9 Hz, 1H), 7.39 – 7.10 (m, 6H), 4.64 (s, 1H), 3.77 (s, 3H), 3.72(bs, 4H), 2.60 (bs, 4H).

**<sup>13</sup>C NMR (101 MHz, CDCl<sub>3</sub>)** δ 148.8, 141.6, 136.6, 135.2(q, *J* = 31 Hz), 128.1, 126.2, 122.5, 121.2(q, *J* = 273 Hz), 120.4, 118.5, 112.5, 109.9, 107.3, 67.3, 61.6, 51.9, 33.2.

**HRMS:** calculated for C<sub>22</sub>H<sub>22</sub>F<sub>3</sub>N<sub>5</sub>O<sub>3</sub>: 461.1675, not found, fragment 373.0319

**I.R.(thin film):** 3689, 2971, 2853, 1596, 1509, 1425, 1334, 1297, 1256, 1207, 1154, 1113, 1071, 1034, 1005cm<sup>-1</sup>

#### Compound 4j

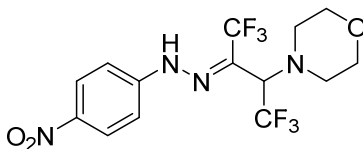

C<sub>14</sub>H<sub>14</sub>F<sub>6</sub>N<sub>4</sub>O<sub>3</sub>

400.28g.mol<sup>-1</sup>

Trifluoroacetaldehyde 4-nitrophenylhydrazone (0.5mmol, 117mg, 1.0eq) was added to a solution of morpholine (0.5mmol, 44mg, 1.0eq) and ethyl trifluoroacetaldehyde hemiacetal (0.5mmol, 65mg, 1.0eq) in 3ml toluene. The stirred mixture was heated to reflux under Ar for 12h. After completion of present reaction, the reaction mixture was concentrated under vacuum. The residue was purified by column chromatography on silica gel (eluent: Et<sub>2</sub>O:PE=50:50) to afford the desired product **4j** (79%, 158mg).

**Aspect:** brown solid, m. p. 198.6-199.5 °C.

**Rf:** 0.44 (Et<sub>2</sub>O:PE=50:50)

**<sup>1</sup>H NMR (400 MHz, MeOD)** δ 8.15 (d, *J* = 9.1 Hz, 2H), 7.28 (d, *J* = 4.2 Hz, 1H), 7.15 (d, *J* = 9.1 Hz, 2H), 3.68 – 3.59 (m, 4H), 2.78 (2.82-2.73, m, 4H).

**<sup>13</sup>C NMR (101 MHz, MeOD)** δ 150.7, 142.6, 127.4(*q*, *J* = 39 Hz), 126.9 (*q*, *J* = 291 Hz) 126.8, 122.5(*q*, *J* = 267 Hz) 113.4, 84.2(*q*, *J* = 27 Hz), 68.3, 51.0.

**HRMS:** calculated for C<sub>14</sub>H<sub>14</sub>F<sub>6</sub>N<sub>4</sub>O<sub>3</sub>: 400.0970, not found, fragment 234.0365

**I.R.(thin film):** 3691, 2968, 2860, 1596, 1454, 1339, 1273, 1251, 1161, 1117, 1021cm<sup>-1</sup>

Compound **4k**

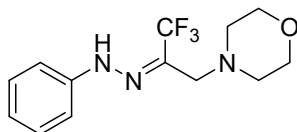

C<sub>13</sub>H<sub>16</sub>F<sub>3</sub>N<sub>3</sub>O

287.29g.mol<sup>-1</sup>

Trifluoroacetaldehyde phenylhydrazone (0.5mmol, 94mg, 1.0eq) was added to a solution of morpholine (0.5mmol, 44mg, 1.0eq) and formaldehyde (0.5mmol, 41mg, 37%, 1.0eq) in 3ml toluene. The stirred mixture was heated to reflux under Ar for 12h. After completion of present reaction, the reaction mixture was concentrated under vacuum. The residue was purified by column chromatography on silica gel (eluent: CH<sub>2</sub>Cl<sub>2</sub>:PE=50:50) to afford the desired product **4k** (95%, 136mg).

**Aspect:** colourless solid, m. p. 127.9-128.9 °C.

**Rf:** 0.41 (CH<sub>2</sub>Cl<sub>2</sub>:PE=50:50)

**<sup>1</sup>H NMR (400 MHz, CDCl<sub>3</sub>)** δ 11.02 (s, 1H), 7.36 – 6.84 (m, 5H), 3.75 (bs, 4H), 3.45 (s, 2H), 2.51 (bs, 4H).

**<sup>13</sup>C NMR (101 MHz, CDCl<sub>3</sub>)** δ 143.7, 129.5, 126.3(*q*, *J* = 34 Hz), 121.9(*q*, *J* = 270 Hz), 121.8, 113.4, 67.1, 54.4, 52.7.

**HRMS:** calculated for C<sub>13</sub>H<sub>16</sub>F<sub>3</sub>N<sub>3</sub>O: 287.1245, found: 287.1247.

**I.R.(thin film):** 3172, 3107, 3030, 2973, 2858, 2833, 1601, 1523, 1496, 1456, 1376, 1346, 1296, 1251, 1155, 1119, 1053, 1005cm<sup>-1</sup>

Compound **4l**

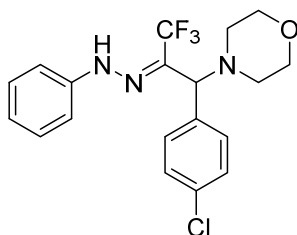

C<sub>19</sub>H<sub>19</sub>ClF<sub>3</sub>N<sub>3</sub>O

397.83g.mol<sup>-1</sup>

Trifluoroacetaldehyde phenylhydrazone (0.5mmol, 94mg, 1.0eq) was added to a solution of morpholine (0.5mmol, 44mg, 1.0eq) and p-chlorobenzaldehyde (0.5mmol, 70mg, 1.0eq) in 3ml toluene. The stirred

mixture was heated to reflux under Ar for 12h. After completion of present reaction, the reaction mixture was concentrated under vacuum. The residue was purified by column chromatography on silica gel (eluent: Et<sub>2</sub>O:PE=40:60) to afford the desired product **4l** (85%, 169mg).

**Aspect:** white solid, m. p. 135.8-136.7 °C.

**Rf:** 0.51 (Et<sub>2</sub>O:PE=40:60)

**<sup>1</sup>H NMR (400 MHz, CDCl<sub>3</sub>)** δ 11.94 (s, 1H), 7.39-7.32(m, 6H), 7.19-7.16 (m, 2H), 7.02-6.98 (m, 1H), 4.16 (s, 1H), 3.76 (bs, 4H), 2.47 (bs, 4H).

**<sup>13</sup>C NMR (101 MHz, CDCl<sub>3</sub>)** δ 143.4, 134.9, 134.6, 130.3, 129.6, 129.5, 127.7(q, *J* = 32 Hz), 121.9, 121.9(q, *J* = 272 Hz), 113.3, 70.7, 67.2, 52.2.

**HRMS:** calculated for C<sub>19</sub>H<sub>19</sub>ClF<sub>3</sub>N<sub>3</sub>O: 397.1169, found: 397.1172.

**I.R.(thin film):** 3691, 3169, 3031, 2971, 2916, 2883, 2855, 1599, 1514, 1493, 1456, 1364, 1245, 1210, 1164, 1119, 1096, 1035cm<sup>-1</sup>

#### Compound **4m**

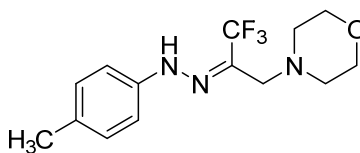

C<sub>14</sub>H<sub>18</sub>F<sub>3</sub>N<sub>3</sub>O

301.31g.mol<sup>-1</sup>

Trifluoroacetaldehyde 4-methylphenylhydrazone (0.5mmol, 101mg, 1.0eq) was added to a solution of morpholine (0.5mmol, 44mg, 1.0eq) and formaldehyde (0.5mmol, 41mg, 37%, 1.0eq) in 3ml toluene. The stirred mixture was heated to reflux under Ar for 12h. After completion of present reaction, the reaction mixture was concentrated under vacuum. The residue was purified by column chromatography on silica gel (eluent: Et<sub>2</sub>O:PE=40:60) to afford the desired product **4m** (95%, 143mg).

**Aspect:** yellow oil

**Rf:** 0.34 (Et<sub>2</sub>O:PE=40:60)

**<sup>1</sup>H NMR (400 MHz, CDCl<sub>3</sub>)** δ 10.91 (s, 1H), 7.12 (d, *J* = 8.4 Hz, 2H), 7.06 – 6.98 (m, 2H), 3.74 (bs, 4H), 3.44 (s, 2H), 2.51 (bs, 4H), 2.32 (s, 3H).

**<sup>13</sup>C NMR (101 MHz, CDCl<sub>3</sub>)** δ 141.5, 131.2, 129.9, 125.5(q, *J* = 34 Hz), 121.9(q, *J* = 270 Hz), 113.4, 67.1, 54.3, 52.7, 20.8.

**HRMS:** calculated for C<sub>14</sub>H<sub>18</sub>F<sub>3</sub>N<sub>3</sub>O:301.1402, found: 301.1404

**I.R.(thin film):** 3691, 3171, 3026, 2973, 2859, 2834, 1606, 1525, 1456, 1376, 1346, 1273, 1251, 1174, 1118, 1053, 1005cm<sup>-1</sup>

Compound **4n**

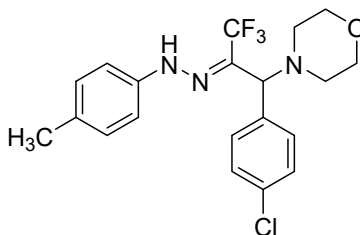

$C_{20}H_{21}ClF_3N_3O$

411.85g.mol<sup>-1</sup>

Trifluoroacetaldehyde 4-methylphenylhydrazone (0.5mmol, 101mg, 1.0eq) was added to a solution of morpholine (0.5mmol, 44mg, 1.0eq) and p-chlorobenzaldehyde (0.5mmol, 70mg, 1.0eq) in 3ml toluene. The stirred mixture was heated to reflux under Ar for 12h. After completion of present reaction, the reaction mixture was concentrated under vacuum. The residue was purified by column chromatography on silica gel (eluent: CH<sub>2</sub>Cl<sub>2</sub>:PE=50:50) to afford the desired product **4n** (68%, 140mg).

**Aspect:** yellow oil

**Rf:** 0.34 (DCM:PE=50:50)

**<sup>1</sup>H NMR (400 MHz, CDCl<sub>3</sub>)** δ 11.85 (s, 1H), 7.40-7.32 (m, 4H), 7.20 – 7.05 (m, 4H), 4.16 (s, 1H), 3.76 (bs, 4H), 2.47 (bs, 4H), 2.34 (s, 3H).

**<sup>13</sup>C NMR (101 MHz, CDCl<sub>3</sub>)** δ 141.2, 134.9, 134.7, 131.4, 130.3, 130.1, 129.5, 127.0(q, *J* = 32 Hz), 122.0(q, *J* = 272 Hz), 113.3, 70.6, 67.2, 52.2, 20.8.

**HRMS:** calculated for C<sub>20</sub>H<sub>21</sub>ClF<sub>3</sub>N<sub>3</sub>O:411.1325, found: 411.1306

**I.R.(thin film):** 3691, 3170, 2971, 2856, 1604, 1524, 1493, 1455, 1364, 1287, 1244, 1205, 1164, 1096, 1035cm<sup>-1</sup>

Compound **4o**

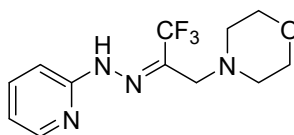

$C_{12}H_{15}F_3N_4O$

288.27g.mol<sup>-1</sup>

(E)-2-(2-(2,2,2-trifluoroethylidene)hydrazinyl)pyridine (0.5mmol, 90mg, 1.0eq) was added to a solution of morpholine (0.5mmol, 44mg, 1.0eq) and formaldehyde (0.5mmol, 41mg, 37%, 1.0eq) in 3ml toluene. The stirred mixture was heated to reflux under Ar for 12h. After completion of present reaction, the reaction mixture was concentrated under vacuum. The residue was purified by column chromatography on silica gel (eluent: EA:PE=50:50) to afford the desired product **4o** (81%, 116mg).

**Aspect:** yellow oil

**Rf:** 0.54 (EA:PE=50:50)

**<sup>1</sup>H NMR (400 MHz, CDCl<sub>3</sub>)** δ 11.24 (s, 1H), 8.24 (d, *J* = 4.7 Hz, 1H), 7.66 (dd, *J* = 10.8, 4.8 Hz, 1H), 7.38 – 7.21 (m, 1H), 6.94 – 6.79 (m, 1H), 3.89 – 3.69 (m, 4H), 3.49 (s, 2H), 2.54 (bs, 4H).

**<sup>13</sup>C NMR (101 MHz, CDCl<sub>3</sub>)** δ 156.1, 147.9, 138.2, 128.4(q, *J* = 34 Hz), 121.4(q, *J* = 271 Hz), 117.4, 107.6,

66.8, 54.3, 52.8.

**HRMS:** calculated for  $C_{12}H_{15}F_3N_4O$ : 288.1198, found: 288.1200.

**I.R.(thin film):** 3172, 2972, 2899, 2863, 2830, 1597, 1577, 1515, 1444, 1375, 1345, 1296, 1268, 1178, 1146, 1058  $cm^{-1}$

#### Compound **4p**

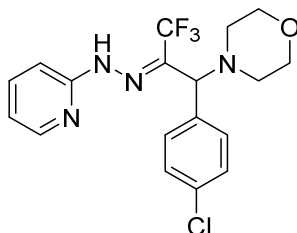

$C_{18}H_{18}ClF_3N_4O$

398.81  $g \cdot mol^{-1}$

(E)-2-(2-(2,2,2-trifluoroethylidene)hydrazinyl)pyridine (0.5mmol, 90mg, 1.0eq) was added to a solution of morpholine (0.5mmol, 44mg, 1.0eq) and p-chlorobenzaldehyde (0.5mmol, 70mg, 1.0eq) in 3ml toluene. The stirred mixture was heated to reflux under Ar for 15h. After completion of present reaction, the reaction mixture was concentrated under vacuum. The residue was purified by column chromatography on silica gel (eluent: EA:PE=40:60) to afford the desired product **4p** (47%, 93mg).

**Aspect:** yellow oil

**Rf:** 0.63(EA:PE=40:60)

**$^1H$  NMR (400 MHz,  $CDCl_3$ )**  $\delta$  12.11 (s, 1H), 8.27 – 8.19 (m, 1H), 7.63 (t,  $J$  = 7.8 Hz, 1H), 7.41 (d,  $J$  = 8.2 Hz, 2H), 7.35 – 7.26 (m, 3H), 6.89 (dd,  $J$  = 8.1, 4.0 Hz, 1H), 4.16 (s, 1H), 3.87 – 3.73 (m, 4H), 2.45 (bs, 4H).

**$^{13}C$  NMR (101 MHz,  $CDCl_3$ )**  $\delta$  155.9, 148.1, 138.4, 135.0, 134.3, 130.3, 129.6(q,  $J$  = 32 Hz), 129.4, 121.5(q,  $J$  = 272 Hz), 117.6, 107.6, 70.7, 66.8, 52.3.

**HRMS:** calculated for  $C_{18}H_{18}ClF_3N_4O$ : 398.1121, found: 398.1131.

**I.R.(thin film):** 3173, 2970, 2860, 2828, 1596, 1575, 1510, 1493, 1443, 1362, 1297, 1269, 1169, 1146, 1120, 1094, 1036  $cm^{-1}$

#### Compound **4q**

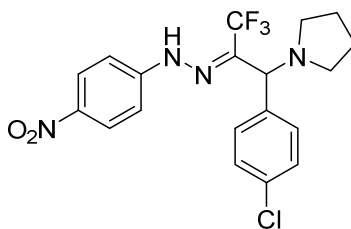

$C_{19}H_{18}ClF_3N_4O_2$

426.82  $g \cdot mol^{-1}$

Trifluoroacetaldehyde 4-nitrophenylhydrazone (0.5mmol, 117mg, 1.0eq) was added to a solution of pyrrolidine (0.5mmol, 36mg, 1.0eq) and p-chlorobenzaldehyde (0.5mmol, 70mg, 1.0eq) in 3ml toluene. The stirred mixture was heated to reflux under Ar for 12h. After completion of present reaction, the

reaction mixture was concentrated under vacuum. The residue was purified by column chromatography on silica gel (eluent: CH<sub>2</sub>Cl<sub>2</sub>:PE = 50:50) to afford the desired product **4q** (82%, 175mg).

**Aspect:** yellow oil

**R<sub>f</sub>:** 0.47 (CH<sub>2</sub>Cl<sub>2</sub>:PE=50:50)

**<sup>1</sup>H NMR (400 MHz, CDCl<sub>3</sub>)** δ 12.63 (s, 1H), 8.08 (d, *J* = 9.2 Hz, 2H), 7.25 – 7.17 (m, 4H), 7.03 (d, *J* = 9.2 Hz, 2H), 4.09 (s, 1H), 2.39 (bs, 4H), 1.91-1.84 (m, 4H).

**<sup>13</sup>C NMR (101 MHz, CDCl<sub>3</sub>)** δ 148.9, 141.7, 135.8, 134.9, 133.8(q, *J* = 32 Hz), 129.7, 129.5, 126.1, 121.3(q, *J* = 272 Hz), 112.8, 69.6, 53.1, 23.6.

**HRMS:** calculated for C<sub>19</sub>H<sub>18</sub>ClF<sub>3</sub>N<sub>4</sub>O<sub>2</sub>:426.1070, found:426.1076.

**I.R.(thin film):** 3691, 2976, 2824, 1594, 1509, 1493, 1336, 1254, 1208, 1161, 1127, 1111, 1015cm<sup>-1</sup>

Compound **4r**

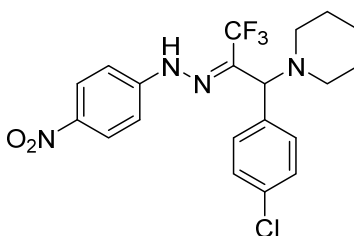

C<sub>20</sub>H<sub>20</sub>ClF<sub>3</sub>N<sub>4</sub>O<sub>2</sub>

440.85g.mol<sup>-1</sup>

Trifluoroacetaldehyde 4-nitrophenylhydrazone (0.5mmol, 117mg, 1.0eq) was added to a solution of piperidine (0.5mmol, 43mg, 1.0eq) and p-chlorobenzaldehyde (0.5mmol, 70mg, 1.0eq) in 3ml toluene. The stirred mixture was heated to reflux under Ar for 12h. After completion of present reaction, the reaction mixture was concentrated under vacuum. The residue was purified by column chromatography on silica gel (eluent: CH<sub>2</sub>Cl<sub>2</sub>:PE = 40:60) to afford the desired product **4r** (87%, 191mg).

**Aspect:** light yellow solid, m.p. 192.9-194.4°C

**R<sub>f</sub>:** 0.50 (DCM:PE=40:60)

**<sup>1</sup>H NMR (400 MHz, CDCl<sub>3</sub>)** δ 13.03 (s, 1H), 8.21 (d, *J* = 9.2 Hz, 2H), 7.32 (s, 4H), 7.23 – 7.14 (m, 2H), 4.17 (s, 1H), 2.40 (bs, 4H), 1.70 – 1.50 (m, 6H).

**<sup>13</sup>C NMR (101 MHz, CDCl<sub>3</sub>)** δ 148.8, 141.7, 135.0, 134.7, 133.7(q, *J* = 32 Hz), 130.2, 129.6, 126.2, 121.3(q, *J* = 273 Hz), 112.6, 71.3, 52.8, 26.5, 24.0.

**HRMS:** calculated for C<sub>20</sub>H<sub>20</sub>ClF<sub>3</sub>N<sub>4</sub>O<sub>2</sub>:440.1227, found: 440.1218.

**I.R.(thin film):** 3692, 2943, 2817, 1594, 1510, 1492, 1386, 1254, 1214, 1161, 1111, 1025, 1016cm<sup>-1</sup>

#### Compound 4s

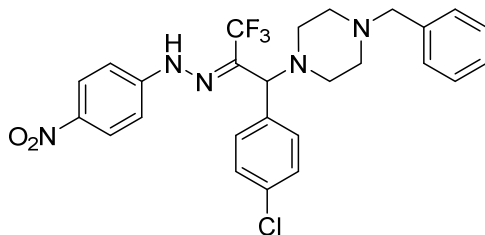

$C_{26}H_{25}ClF_3N_5O_2$

531.96 g.mol<sup>-1</sup>

Trifluoroacetaldehyde 4-nitrophenylhydrazone (0.5mmol, 117mg, 1.0eq) was added to a solution of 1-benzylpiperazine (0.5mmol, 88mg, 1.0eq) and p-chlorobenzaldehyde (0.5mmol, 70mg, 1.0eq) in 3ml toluene. The stirred mixture was heated to reflux under Ar for 12h. After completion of present reaction, the reaction mixture was concentrated under vacuum. The residue was purified by column chromatography on silica gel (eluent: Et<sub>2</sub>O:PE=70:30) to afford the desired product **4s** (81%, 215mg).

**Aspect:** white solid, m. p. 84.1-85.9 °C.

**Rf:** 0.40 (Et<sub>2</sub>O:PE=70:30)

**<sup>1</sup>H NMR (400 MHz, CDCl<sub>3</sub>)** δ 12.81 (s, 1H), 8.23 (d, *J* = 9.1 Hz, 2H), 7.39 – 7.24 (m, 9H), 7.16 (d, *J* = 8.8 Hz, 2H), 4.22 (s, 1H), 3.56 (s, 2H), 2.50 (bs, 8H).

**<sup>13</sup>C NMR (101 MHz, CDCl<sub>3</sub>)** δ 148.6, 141.8, 137.2, 135.2, 134.2, 133.2(q, *J* = 33 Hz), 130.2, 129.7, 129.2, 128.4, 127.4, 126.2, 121.2(q, *J* = 272 Hz), 112.7, 70.8, 62.7, 53.2, 51.7.

**HRMS:** calculated for C<sub>26</sub>H<sub>25</sub>ClF<sub>3</sub>N<sub>5</sub>O<sub>2</sub>: 531.1649, found: 531.1628

**I.R.(thin film):** 3691, 3088, 3031, 2973, 2833, 2770, 2444, 1902, 1595, 1510, 1494, 1458, 1373, 1336, 1297, 1254, 1208, 1159, 1127, 1111, 1095, 1037cm<sup>-1</sup>

#### Compound 4t

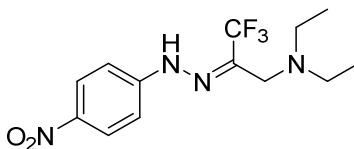

$C_{13}H_{17}F_3N_4O_2$

318.30g.mol<sup>-1</sup>

Trifluoroacetaldehyde 4-nitrophenylhydrazone (0.5mmol, 117mg, 1.0eq) was added to a solution of diethylamine (0.5mmol, 37mg, 1.0eq) and formaldehyde (0.5mmol, 41mg, 37%, 1.0eq) in 3ml toluene. The stirred mixture was heated to reflux under Ar for 12h. After completion of present reaction, the reaction mixture was concentrated under vacuum. The residue was purified by column chromatography on silica gel (eluent: CH<sub>2</sub>Cl<sub>2</sub>:PE=50:50) to afford the desired product **4t** (89%, 141mg).

**Aspect:** yellow solid, m. p. 78.2-79.6 °C.

**Rf:** 0.43 (CH<sub>2</sub>Cl<sub>2</sub>:PE=50:50)

**<sup>1</sup>H NMR (400 MHz, CDCl<sub>3</sub>)** : δ (ppm) = 12.32 (s, 1H), 8.16 (d, *J* = 9.0 Hz, 2H), 7.07 (d, *J* = 9.0 Hz, 2H), 3.56 (s, 2H), 2.60 (q, *J* = 7.1 Hz, 4H), 1.12 (t, *J* = 7.1 Hz, 6H).



**<sup>13</sup>C NMR (101 MHz, CDCl<sub>3</sub>)** : δ (ppm) = 149.0, 141.5, 132.4(q, *J* = 33 Hz), 126.1, 121.3(q, *J* = 271 Hz), 112.5, 50.6, 46.7, 11.5.

**HRMS**: calculated for C<sub>13</sub>H<sub>17</sub>F<sub>3</sub>N<sub>4</sub>O<sub>2</sub>: 318.1304, found: 318.1305

**I.R.(thin film)**: 3691, 3105, 2976, 2938, 2878, 2843, 2444, 1918, 1596, 1528, 1509, 1458, 1438, 1427, 1383, 1335, 1298, 1258, 1206, 1158, 1111, 1065, 1041cm<sup>-1</sup>

#### Compound **4u**

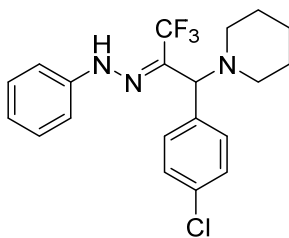

C<sub>20</sub>H<sub>21</sub>ClF<sub>3</sub>N<sub>3</sub>  
395.85g.mol<sup>-1</sup>

Trifluoroacetaldehyde phenylhydrazone (0.5mmol, 94mg, 1.0eq) was added to a solution of piperidine (0.5mmol, 43mg, 1.0eq) and p-chlorobenzaldehyde (0.5mmol, 70mg, 1.0eq) in 3ml toluene. The stirred mixture was heated to reflux under Ar for 12h. After completion of present reaction, the reaction mixture was concentrated under vacuum. The residue was purified by column chromatography on silica gel (eluent: CH<sub>2</sub>Cl<sub>2</sub>:PE=10:90) to afford the desired product **4u** (75%, 148mg).

**Aspect**: yellow oil

**Rf**: 0.78 (DCM:PE=10:90)

**<sup>1</sup>H NMR (400 MHz, CDCl<sub>3</sub>)** δ 12.29 (s, 1H), 7.39-7.33 (m, 6H), 7.21 (d, *J* = 7.3 Hz, 2H), 7.03-7.00 (m, 1H), 4.14 (d, *J* = 4.4 Hz, 1H), 2.42 (bs, 4H), 1.78 – 1.42 (m, 6H).

**<sup>13</sup>C NMR (101 MHz, CDCl<sub>3</sub>)** δ 143.8, 135.9, 134.5, 130.2, 129.5, 129.3, 128.8(q, *J* = 32 Hz), 122.0(q, *J* = 271 Hz), 121.5, 71.0, 52.8, 26.5, 24.2.

**HRMS**: calculated for C<sub>20</sub>H<sub>21</sub>ClF<sub>3</sub>N<sub>3</sub>:395.1376, found: 395.1363.

**I.R.(thin film)**: 3692, 2942, 1600, 1492, 1247, 1164, 1114, 1095, 1016cm<sup>-1</sup>

#### Compound **4v**

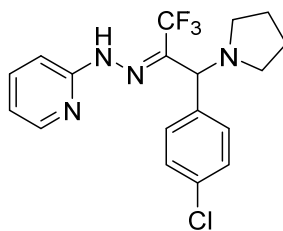

C<sub>18</sub>H<sub>18</sub>ClF<sub>3</sub>N<sub>4</sub>  
382.82g.mol<sup>-1</sup>

(E)-2-(2-(2,2,2-trifluoroethylidene)hydrazinyl)pyridine (0.5mmol, 90mg, 1.0eq) was added to a solution of pyrrolidine (0.5mmol, 36mg, 1.0eq) and p-chlorobenzaldehyde (0.5mmol, 70mg, 1.0eq) in 3ml toluene. The stirred mixture was heated to reflux under Ar for 15h. After completion of present reaction, the



## Compound 5b

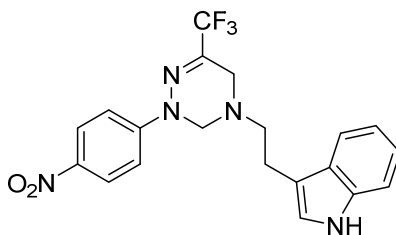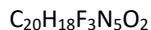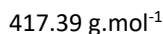

Trifluoroacetaldehyde 4-nitrophenylhydrazone (0.5mmol, 117mg, 1.0eq) was added to a solution of aqueous formaldehyde (1mmol, 82mg, 37%, 2.0eq) and tryptamine (0.5mmol, 80mg, 1.0eq) in 3ml toluene. The stirred mixture was heated to reflux under Ar for 12h. After completion of present reaction, the reaction mixture was concentrated under vacuum. The residue was purified by column chromatography on silica gel (eluent: PE:Et<sub>2</sub>O=50:50) to afford the desired product **5b** (36%, 75mg).

**Aspect:** yellow solid m.p. 198.6°C-199.5°C

**Rf:** 0.47 (PE:CH<sub>2</sub>Cl<sub>2</sub>=50:50)

**<sup>1</sup>H NMR (400 MHz, CDCl<sub>3</sub>)** δ 11.96 (s, 1H), 8.10 (dd, *J* = 8.0, 2.9 Hz, 2H), 7.85 (s, 1H), 7.53 (s, 1H), 7.41 – 7.30 (m, 1H), 7.29 – 7.10 (m, 2H), 7.09 – 6.94 (m, 2H), 3.80 (bs, 4H), 3.03-2.97 (m, 4H).

**<sup>13</sup>C NMR (101 MHz, CDCl<sub>3</sub>)** δ 148.7, 141.7, 136.2, 131.0(*q*, *J* = 34 Hz), 129.9, 126.8, 126.0, 122.2, 121.3(*q*, *J* = 273 Hz), 119.9, 118.2, 112.9, 111.1, 107.9, 54.0, 50.5, 50.0, 21.3.

**HRMS:** calculated for C<sub>20</sub>H<sub>18</sub>F<sub>3</sub>N<sub>5</sub>O<sub>2</sub>: 417.1413, found: 417.1428

**I.R.(thin film):** 2840, 1592, 1513, 1336, 1284, 1259, 1205, 1175, 11131, 1111, 1067, 1021cm<sup>-1</sup>

## Compound 5c

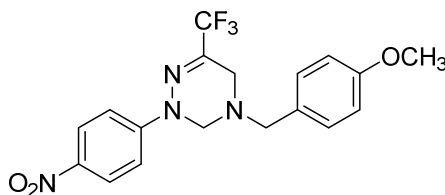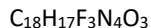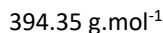

Trifluoroacetaldehyde 4-nitrophenylhydrazone (0.5mmol, 117mg, 1.0eq) was added to a solution of aqueous formaldehyde (1mmol, 82mg, 37%, 2.0eq) and para-methoxybenzylamine (0.5mmol, 69mg, 1.0eq) in 3ml toluene. The stirred mixture was heated to reflux under Ar for 12h. After completion of present reaction, the reaction mixture was concentrated under vacuum. The residue was purified by column chromatography on silica gel (eluent: PE:Et<sub>2</sub>O=50:50) to afford the desired product **5b** (98%, 193mg).

**Aspect:** yellow oil

**Rf:** 0.38 (PE:Et<sub>2</sub>O=50:50)

**<sup>1</sup>H NMR (400 MHz, CDCl<sub>3</sub>)** δ 8.16 (d, *J* = 9.2 Hz, 2H), 7.23 – 7.12 (m, 4H), 6.86 (d, *J* = 8.3 Hz, 2H), 4.55 (s, 2H), 3.80 (s, 3H), 3.68-3.65 (m, 4H).

**<sup>13</sup>C NMR (101 MHz, CDCl<sub>3</sub>)** δ 159.6, 149.7, 141.8, 132.9(q, *J* = 35 Hz), 130.5, 128.1, 125.6, 120.6(q, *J* = 272 Hz), 114.2, 113.1, 62.5, 57.1, 55.4, 45.6.

**HRMS:** calculated for C<sub>18</sub>H<sub>17</sub>F<sub>3</sub>N<sub>4</sub>O<sub>3</sub>:394.1253, found: 394.1265

**I.R.(thin film):** 3470, 1595, 1529, 1509, 1386, 1337, 1326, 1258, 1168, 1158, 1130, 1112, 1068cm<sup>-1</sup>

#### Compound **7a**

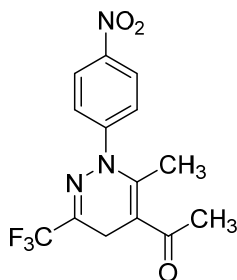

C<sub>14</sub>H<sub>12</sub>F<sub>3</sub>N<sub>3</sub>O<sub>3</sub>

327.26g.mol<sup>-1</sup>

Mannich adduct **4a** (0.5mmol, 166mg) was dissolved in 2.5mL pentane-2,4-dione, and the stirred mixture was heated to 130°C under Ar for 12h. After completion of present reaction, the reaction mixture was concentrated under vacuum. The residue was purified by column chromatography on silica gel (eluent: Et<sub>2</sub>O:PE=50:50) to afford the desired product **7a** (58%, 95mg).

**Aspect:** yellow solid, m.p. 159.6-161.2°C

**R<sub>f</sub>:** 0.29 (Et<sub>2</sub>O:PE=50:50)

**<sup>1</sup>H NMR (400 MHz, CDCl<sub>3</sub>)** δ 8.29 (d, *J* = 9.2 Hz, 2H), 7.49 (d, *J* = 9.2 Hz, 2H), 3.29 (s, 2H), 2.36 (s, 3H), 2.22 (s, 3H).

**<sup>13</sup>C NMR (101 MHz, CDCl<sub>3</sub>)** δ 197.0, 147.3, 145.7, 144.8, 137.7(q, *J* = 36 Hz), 124.9, 124.7, 120.5(q, *J* = 272 Hz), 106.9, 30.2, 23.0, 18.3.

**HRMS:** calculated for C<sub>14</sub>H<sub>12</sub>F<sub>3</sub>N<sub>3</sub>O<sub>3</sub>:327.0831, found: 327.0821.

**I.R.(thin film):** 1675, 1595, 1572, 1524, 1349, 1310, 1251, 1221, 1201, 1137, 1040cm<sup>-1</sup>

#### Compound **7b**

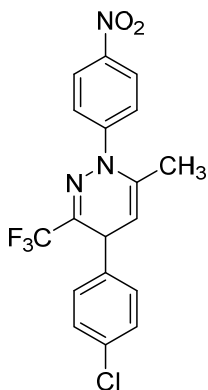

C<sub>18</sub>H<sub>13</sub>ClF<sub>3</sub>N<sub>3</sub>O<sub>2</sub>

395.77g.mol<sup>-1</sup>

Mannich adduct **4b** (0.5mmol, 221mg) was dissolved in 2.5mL acetone, and the stirred mixture was heated to 130°C under microwave for 1h. After completion of present reaction, the reaction mixture was concentrated under vacuum. The residue was purified by column chromatography on silica gel (eluent: Et<sub>2</sub>O:PE=50:50) to afford the desired product **7b** (34%, 67mg).

**Aspect:** yellow oil

**Rf:** 0.7(Et<sub>2</sub>O:PE=50:50)

**<sup>1</sup>H NMR (400 MHz, CDCl<sub>3</sub>)** δ 8.27 (d, *J* = 9.2 Hz, 2H), 7.47 (d, *J* = 9.1 Hz, 2H), 7.30 (d, *J* = 8.5 Hz, 2H), 7.12 (d, *J* = 8.4 Hz, 2H), 5.11 (dd, *J* = 6.3, 1.1 Hz, 1H), 4.41 (d, *J* = 6.2 Hz, 1H), 1.93 (s, 3H).

**<sup>13</sup>C NMR (101 MHz, CDCl<sub>3</sub>)** δ 147.8, 145.1, 140.2, 134.7(q, *J* = 34 Hz), 134.4, 133.7, 129.4, 128.6, 124.7, 123.7, 121.2(q, *J* = 273 Hz), 104.5, 37.4, 19.5.

**HRMS:** calculated for C<sub>18</sub>H<sub>13</sub>ClF<sub>3</sub>N<sub>3</sub>O<sub>2</sub>:395.0648, found: 395.0652.

**I.R.(thin film):** 2932, 1668, 1595, 1522, 1491, 1387, 1346, 1257, 1214, 1189, 1113, 1095, 1016cm<sup>-1</sup>

Compound **7c**

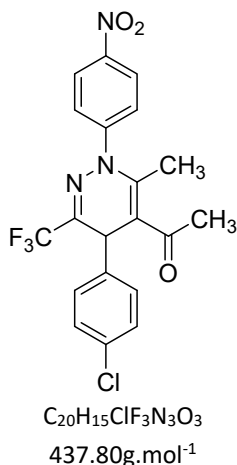

Mannich adduct **4b** (0.5mmol, 221mg) was dissolved in 2.5mL pentane-2,4-dione, and the stirred mixture was heated to 130°C under Ar for 12h. After completion of present reaction, the reaction mixture was concentrated under vacuum. The residue was purified by column chromatography on silica gel (eluent: Et<sub>2</sub>O:PE=50:50) to afford the desired product **7c** (80%, 175mg).

**Aspect:** yellow oil

**Rf:** 0.37 (Et<sub>2</sub>O:PE=50:50)

**<sup>1</sup>H NMR (400 MHz, CDCl<sub>3</sub>)** δ 8.36 (d, *J* = 7.9 Hz, 2H), 7.55 (d, *J* = 8.0 Hz, 2H), 7.31 (d, *J* = 7.2 Hz, 2H), 7.14 (d, *J* = 7.6 Hz, 2H), 5.14 (s, 1H), 2.42 (s, 3H), 2.35 (s, 3H).

**<sup>13</sup>C NMR (101 MHz, CDCl<sub>3</sub>)** δ 196.8, 146.9, 146.1, 143.2, 139.0(q, *J* = 35 Hz), 137.7, 134.2, 129.5, 128.4, 125.1, 125.0, 120.7(q, *J* = 273 Hz), 113.4, 37.3, 30.4, 18.8.

**HRMS:** calculated for C<sub>20</sub>H<sub>15</sub>ClF<sub>3</sub>N<sub>3</sub>O<sub>3</sub>:437.0754, found: 437.0734.

**I.R.(thin film):** 1674, 1595, 1526, 1492, 1349, 1310, 1292, 1221, 1198, 1142, 1039, 1015cm<sup>-1</sup>

Compound **7d**

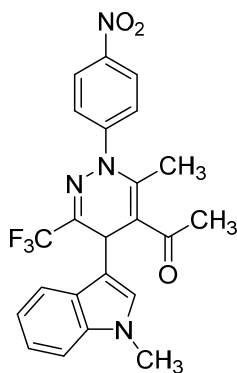

$C_{23}H_{19}F_3N_4O_3$

456.43g.mol<sup>-1</sup>

Mannich adduct **4i** (0.5mmol, 231mg) was dissolved in 2.5mL pentane-2,4-dione, and the stirred mixture was heated to 130°C under Ar for 12h. After completion of present reaction, the reaction mixture was concentrated under vacuum. The residue was purified by column chromatography on silica gel (eluent: Et<sub>2</sub>O:PE=50:50) to afford the desired product **7d** (92%, 210mg).

**Aspect:** yellow oil

**Rf:** 0.29 (Et<sub>2</sub>O:PE=50:50)

**<sup>1</sup>H NMR (400 MHz, CDCl<sub>3</sub>)** δ 8.38 – 8.29 (m, 2H), 7.62 (d, *J* = 8.0 Hz, 1H), 7.59 – 7.52 (m, 2H), 7.32 – 7.20 (m, 2H), 7.17-7.13 (m, 1H), 6.78 (s, 1H), 5.33 (s, 1H), 3.71 (s, 3H), 2.37 (s, 3H), 2.30 (s, 3H).

**<sup>13</sup>C NMR (101 MHz, CDCl<sub>3</sub>)** δ 197.9, 147.4, 145.8, 142.2, 140.1(q, *J* = 34 Hz), 137.1, 127.6, 126.0, 125.9, 125.0, 124.8, 122.3, 120.9(q, *J* = 273 Hz), 120.0, 118.9, 114.2, 113.3, 112.9, 109.8, 33.0, 30.1, 29.6, 18.9.

**HRMS:** calculated for C<sub>23</sub>H<sub>19</sub>F<sub>3</sub>N<sub>4</sub>O<sub>3</sub>:456.1409, found: 456.1409.

**I.R.(thin film):** 2939, 1672, 1595, 1524, 1495, 1348, 1310, 1293, 1221, 1197, 1139, 1111, 1040cm<sup>-1</sup>

Compound **7e**

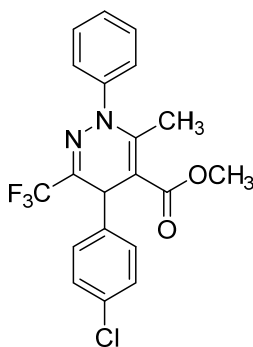

$C_{20}H_{16}ClF_3N_2O_2$

408.80g.mol<sup>-1</sup>

Mannich adduct **4l** (0.5mmol, 199mg) was dissolved in 2.5mL methyl 3-oxobutanoate, and the stirred mixture was heated to 130°C under Ar for 12h. After completion of present reaction, the reaction mixture was concentrated under vacuum. The residue was purified by column chromatography on silica gel (eluent: Et<sub>2</sub>O:PE=40:60) to afford the desired product **7e** (90%, 184mg).

**Aspect:** yellow oil

**Rf:** 0.52 (Et<sub>2</sub>O:PE=40:60)

**<sup>1</sup>H NMR (400 MHz, CDCl<sub>3</sub>)** δ 7.50 – 7.42 (m, 2H), 7.40 – 7.34 (m, 1H), 7.33 – 7.26 (m, 4H), 7.21 – 7.15 (m, 2H), 5.04 (s, 1H), 3.76 (s, 3H), 2.26 (s, 3H).

**<sup>13</sup>C NMR (101 MHz, CDCl<sub>3</sub>)** δ 166.9, 146.8, 142.3, 139.7, 136.9(q, *J* = 35 Hz), 133.6, 129.5, 129.2, 128.6, 128.0, 126.1, 121.0(q, *J* = 273 Hz), 100.9, 51.8, 36.5, 17.8.

**HRMS:** calculated for C<sub>20</sub>H<sub>16</sub>ClF<sub>3</sub>N<sub>2</sub>O<sub>2</sub>:408.0852, found: 408.0838.

**I.R.(thin film):** 2953, 1701, 1595, 1491, 1436, 1384, 1221, 1199, 1138, 1093, 1035, 1016cm<sup>-1</sup>

Compound **7f**

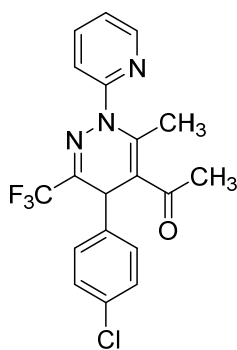

C<sub>19</sub>H<sub>15</sub>ClF<sub>3</sub>N<sub>3</sub>O

393.79g.mol<sup>-1</sup>

Mannich adduct **4p** (0.5mmol, 199mg) was dissolved in 2.5mL pentane-2,4-dione, and the stirred mixture was heated to 130°C under Ar for 12h. After completion of present reaction, the reaction mixture was concentrated under vacuum. The residue was purified by column chromatography on silica gel (eluent: Et<sub>2</sub>O:PE=50:50) to afford the desired product **7f** (56%, 110mg).

**Aspect:** yellow oil

**Rf:** 0.41 (Et<sub>2</sub>O:PE=50:50)

**<sup>1</sup>H NMR (400 MHz, CDCl<sub>3</sub>)** δ 8.51 (ddd, *J* = 4.9, 1.9, 0.7 Hz, 1H), 7.87 (ddd, *J* = 8.2, 7.4, 1.9 Hz, 1H), 7.66 (dd, *J* = 7.4, 0.8 Hz, 1H), 7.32 – 7.22 (m, 5H), 5.09 (s, 1H), 2.43 (s, 3H), 2.38 (s, 3H).

**<sup>13</sup>C NMR (101 MHz, CDCl<sub>3</sub>)** δ 197.0, 154.6, 148.0, 144.5, 138.8, 138.6, 138.0(q, *J* = 34 Hz), 133.9, 129.3, 129.0, 122.0, 120.9(q, *J* = 273 Hz), 118.5, 113.1, 37.4, 30.9, 18.7.

**HRMS:** calculated for C<sub>19</sub>H<sub>15</sub>ClF<sub>3</sub>N<sub>3</sub>O:393.0856, found: 393.0847.

**I.R.(thin film):** 3063, 3014, 1671, 1581, 1490, 1470, 1439, 1381, 1360, 1317, 1292, 1222, 1199, 1140, 1093, 1041cm<sup>-1</sup>

Compound **7g**

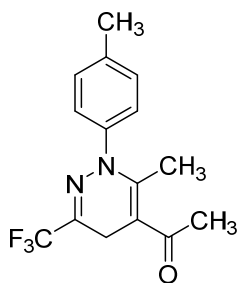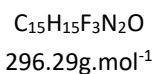

Mannich adduct **4m** (0.5mmol, 151mg) was dissolved in 2.5mL pentane-2,4-dione, and the stirred mixture was heated to 130°C under Ar for 12h. After completion of the reaction, the reaction mixture was concentrated under vacuum. The residue was purified by column chromatography on silica gel (eluent: Et<sub>2</sub>O:PE=10:90) to afford **7g** (77%, 114mg).

**Aspect:** yellow oil

**Rf:** 0.33 (Et<sub>2</sub>O:PE=20:80)

**<sup>1</sup>H NMR (400 MHz, CDCl<sub>3</sub>)** δ 7.23-7.21 (m, 2H), 7.19 – 7.14 (m, 2H), 3.27 (s, 2H), 2.38 (s, 3H), 2.31 (s, 3H), 2.12 (s, 3H).

**<sup>13</sup>C NMR (101 MHz, CDCl<sub>3</sub>)** δ 197.0, 147.1, 140.1, 137.8, 135.0 (q, *J* = 35 Hz), 130.0, 126.1, 120.9 (q, *J* = 271 Hz), 102.8, 30.3, 22.4, 21.2, 18.0

**HRMS:** calculated for C<sub>15</sub>H<sub>15</sub>F<sub>3</sub>N<sub>2</sub>O: 296.1136, found: 296.1122.

**I.R.(thin film):** 3039, 2924, 1664, 1562, 1512, 1420, 1393, 1381, 1360, 1319, 1243, 1219, 1190, 1111, 1039, 1018cm<sup>-1</sup>

Compound **7h**

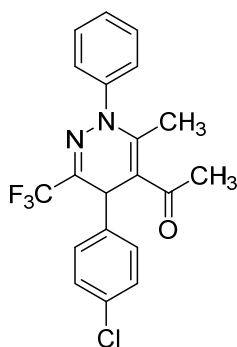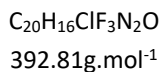

Mannich adduct **4l** (0.5mmol, 199mg) was dissolved in 2.5mL pentane-2,4-dione, and the stirred mixture was heated to 130°C under Ar for 12h. After completion of the reaction, the reaction mixture was concentrated under vacuum. The residue was purified by column chromatography on silica gel (eluent: Et<sub>2</sub>O:PE=20:80) to afford the desired product **7h** (71%, 140mg).

**Aspect:** yellow oil



**Rf:** 0.36 (Et<sub>2</sub>O:PE=30:70)

**<sup>1</sup>H NMR (400 MHz, CDCl<sub>3</sub>)** δ 7.48-7.44 (m, 2H), 7.40 – 7.34 (m, 1H), 7.32 – 7.25 (m, 4H), 7.17-7.15 (m, 2H), 5.05 (s, 1H), 2.34 (s, 3H), 2.23 (s, 3H).

**<sup>13</sup>C NMR (101 MHz, CDCl<sub>3</sub>)** δ 196.7, 145.3, 142.1, 138.9, 137.1(q, *J* = 35 Hz), 133.8, 129.6, 129.3, 128.6, 128.2, 126.1, 121.0(q, *J* = 273 Hz), 110.0, 36.7, 30.6, 18.7

**HRMS:** calculated for C<sub>20</sub>H<sub>16</sub>ClF<sub>3</sub>N<sub>2</sub>O: 392.0903, found: 392.0901.

**I.R.(thin film):** 2969, 1667, 1637, 1592, 1557, 1489, 1382, 1350, 1243, 1214, 1189, 1122, 1091, 1037, 1024, 1013cm<sup>-1</sup>

Compound **7i**

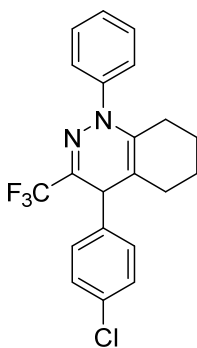

C<sub>21</sub>H<sub>18</sub>ClF<sub>3</sub>N<sub>2</sub>  
390.83g.mol<sup>-1</sup>

Mannich adduct **4i** (0.5mmol, 199mg) was dissolved in 2.5mL cyclohexanone and the stirred mixture was heated to 130°C under Ar for 12h. After completion of the reaction, the reaction mixture was concentrated under vacuum. The residue was purified by column chromatography on silica gel (eluent: Et<sub>2</sub>O:PE=20:80) to afford the desired product **7i** (68%, 132mg).

**Aspect:** gray oil

**Rf:** 0.80 (Et<sub>2</sub>O:PE=40:60)

**<sup>1</sup>H NMR (400 MHz, CDCl<sub>3</sub>)** δ 7.40-7.36 (m, 2H), 7.32 – 7.22 (m, 5H), 7.19 – 7.12 (m, 2H), 4.11 (s, 1H), 2.27 – 2.05 (m, 2H), 2.00 – 1.87 (m, 1H), 1.80 – 1.46 (m, 5H).

**<sup>13</sup>C NMR (101 MHz, CDCl<sub>3</sub>)** δ 143.0, 140.8, 133.3, 131.6, 129.9(q, *J* = 34 Hz), 129.1, 129.0, 128.9, 126.6, 125.5, 121.9(q, *J* = 273 Hz), 109.9, 41.7, 27.1, 26.7, 22.9, 22.3

**HRMS:** calculated for C<sub>21</sub>H<sub>18</sub>ClF<sub>3</sub>N<sub>2</sub>: 390.1111, found: 390.1120.

**I.R.(thin film):** 3043, 2933, 2904, 2887, 2834, 1674, 1607, 1593, 1490, 1386, 1315, 1265, 1216, 1179, 1149, 1115, 1105, 1074, 1032, 1015, 1002cm<sup>-1</sup>

Compound **7j**

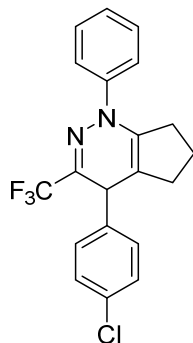

$C_{20}H_{16}ClF_3N_2$

376.81 g.mol<sup>-1</sup>

Mannich adduct **4l** (0.5mmol, 199mg) was dissolved in 2.5mL cyclopentanone and the stirred mixture was heated to 130°C under Ar for 12h. After completion of the reaction, the reaction mixture was concentrated under vacuum. The residue was purified by column chromatography on silica gel (eluent: Et<sub>2</sub>O:PE=20:80) to afford the desired product **7j** (90%, 169mg).

**Aspect:** brown oil

**Rf:** 0.80 (Et<sub>2</sub>O:PE=40:60)

**<sup>1</sup>H NMR (400 MHz, CDCl<sub>3</sub>)** δ 7.39-7.35 (m, 2H), 7.33 – 7.25 (m, 4H), 7.24-7.18 (m, 1H), 7.15 – 7.13 (m, 2H), 4.48 (s, 1H), 2.79-2.72 (m, 1H), 2.38 – 2.14 (m, 3H), 1.98 – 1.80 (m, 2H).

**<sup>13</sup>C NMR (101 MHz, CDCl<sub>3</sub>)** δ 143.5, 140.5, 135.1, 133.3, 130.7(q, *J* = 33 Hz), 129.1, 129.0, 129.0, 125.8, 122.6, 120.1(q, *J* = 273 Hz), 115.0, 40.6, 32.1, 31.5, 21.2

**HRMS:** calculated for C<sub>20</sub>H<sub>16</sub>ClF<sub>3</sub>N<sub>2</sub>: 376.0954, found:376.0941.

**I.R.(thin film):** 3042, 2956, 2850, 1679, 1594, 1584, 1496, 1489, 1379, 1329, 1294, 1225, 1186, 1160, 1117, 1090, 1077, 1014cm<sup>-1</sup>

## 4 $^1\text{H}$ NMR and $^{13}\text{C}$ NMR Spectra of All Compounds

Compound 4a

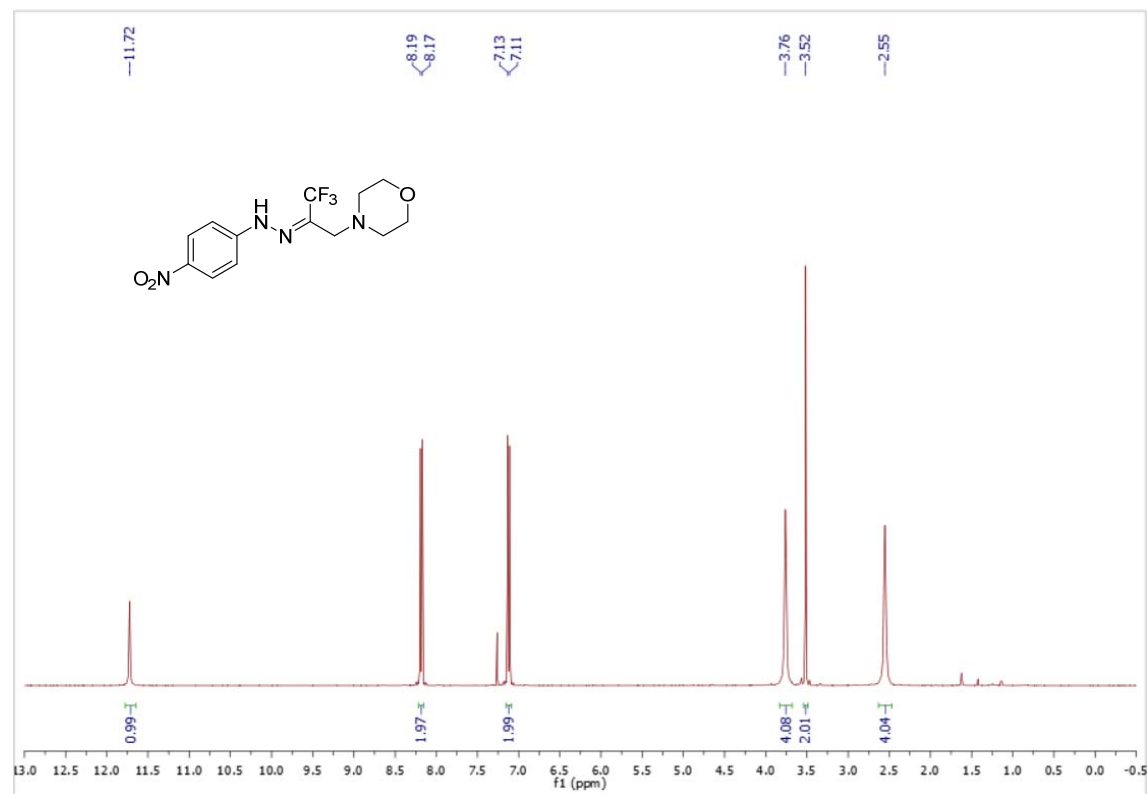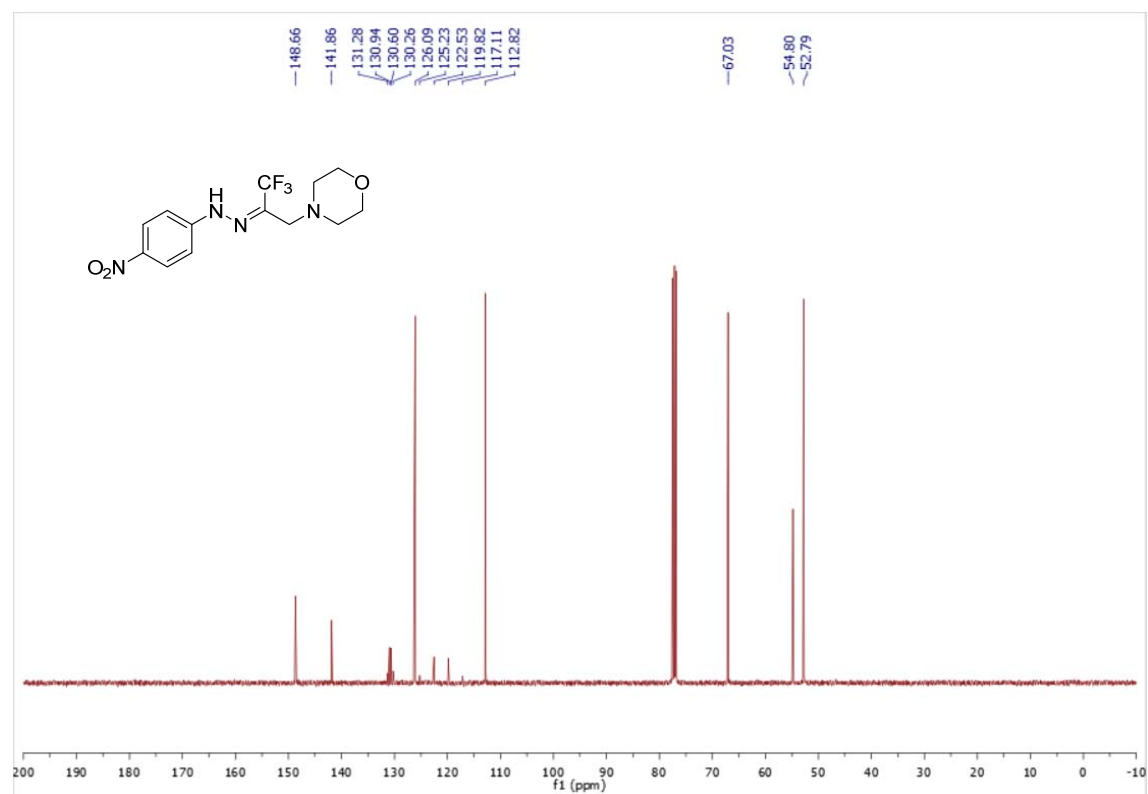

Compound 4b

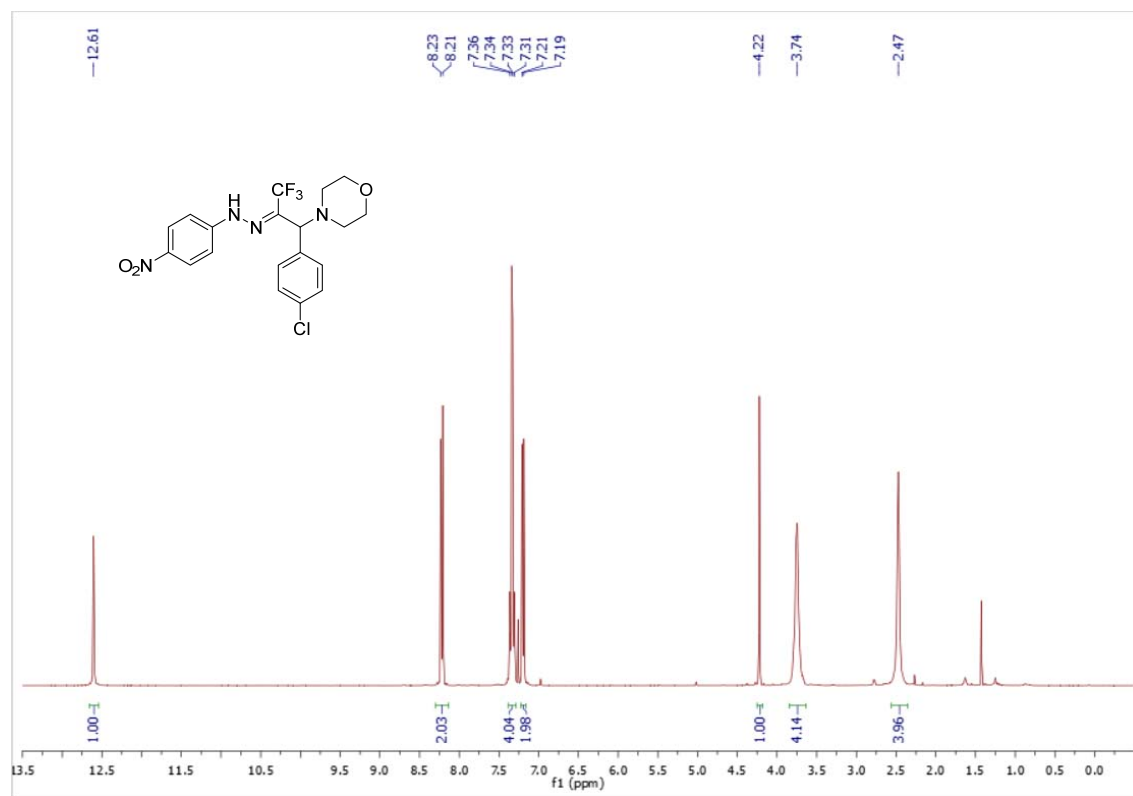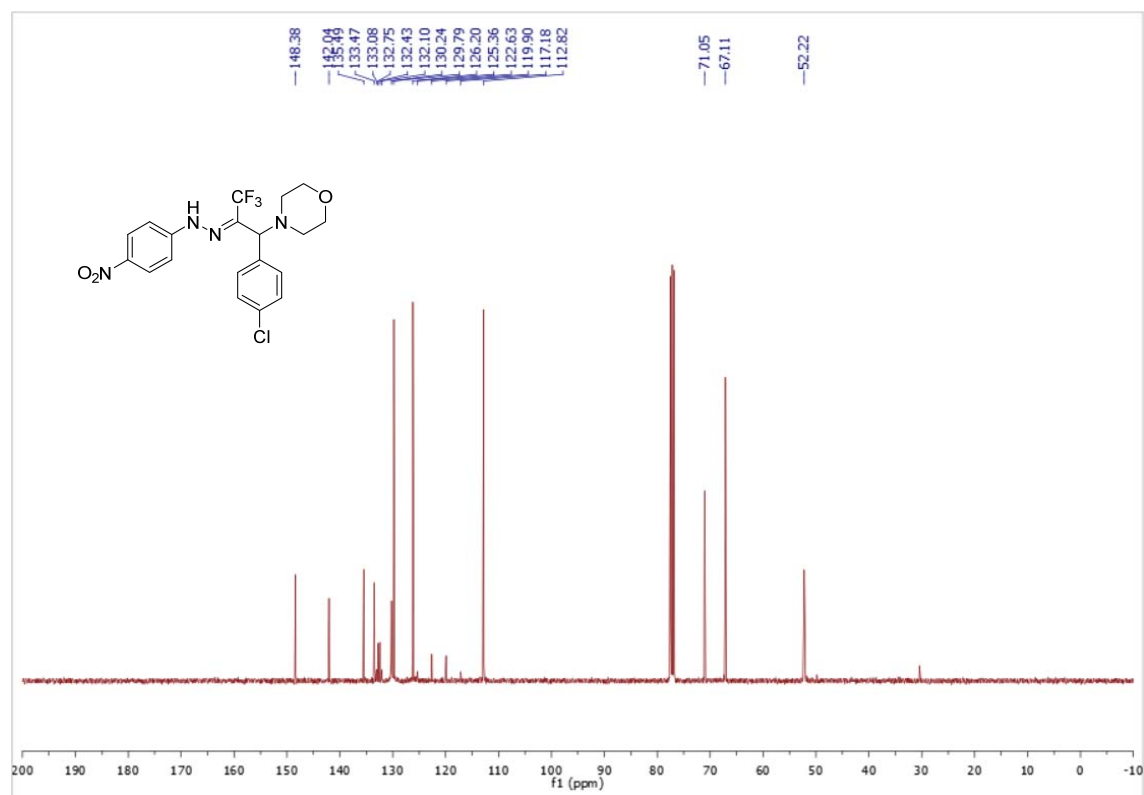

Compound 4c

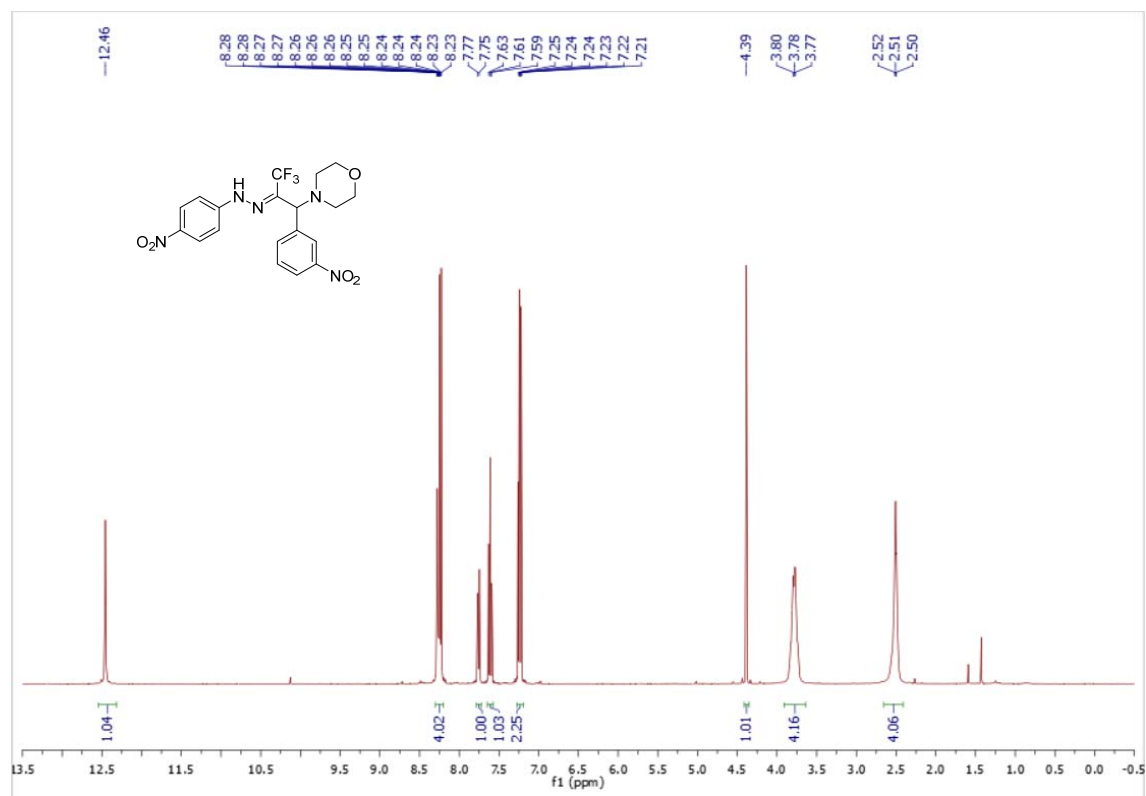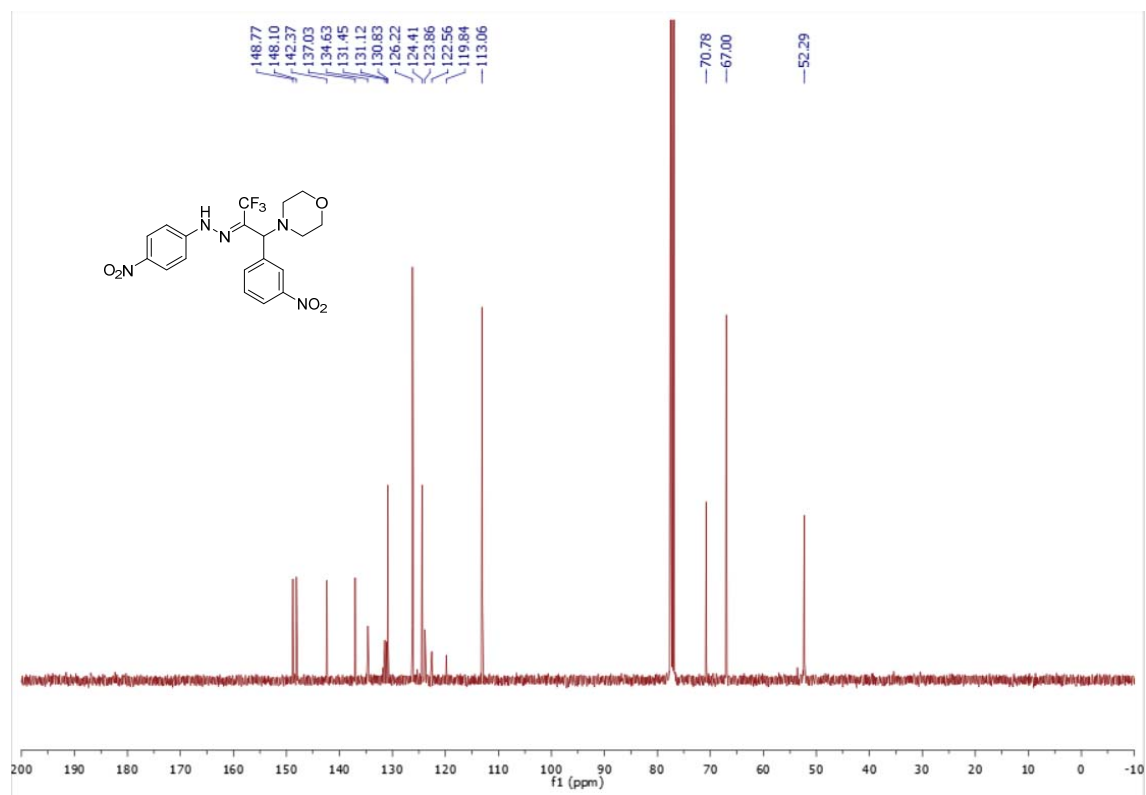

Compound 4d

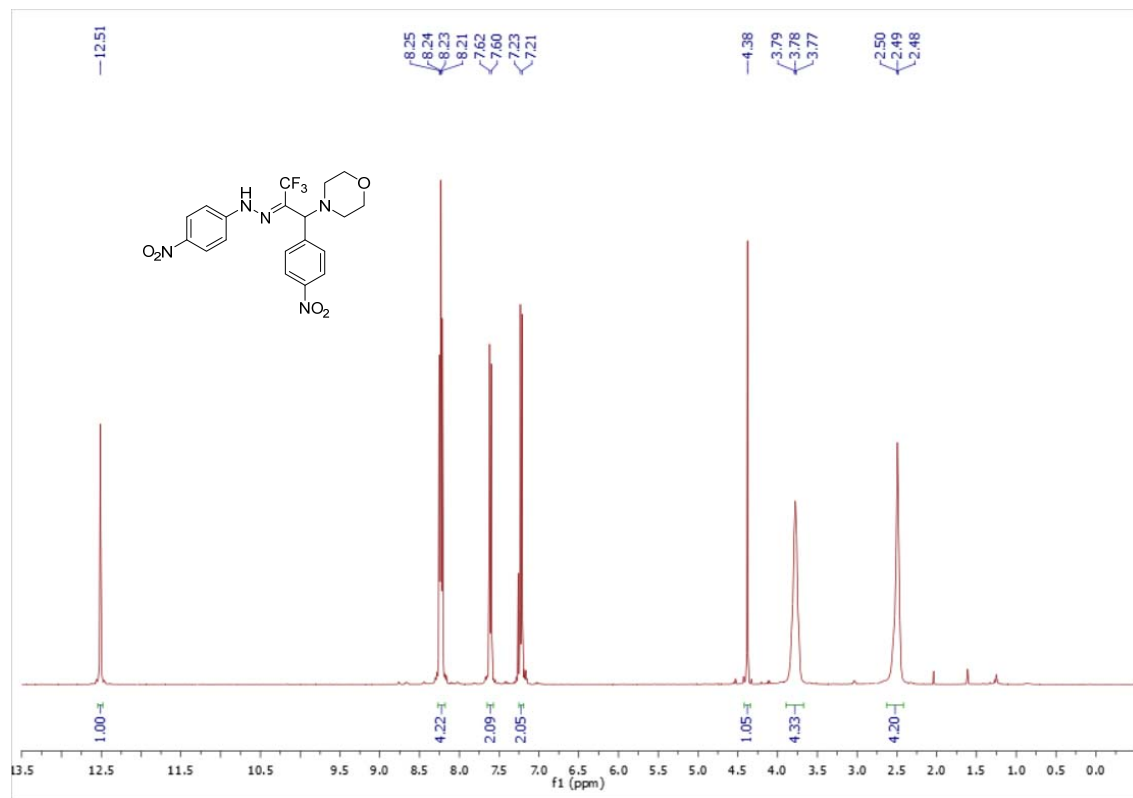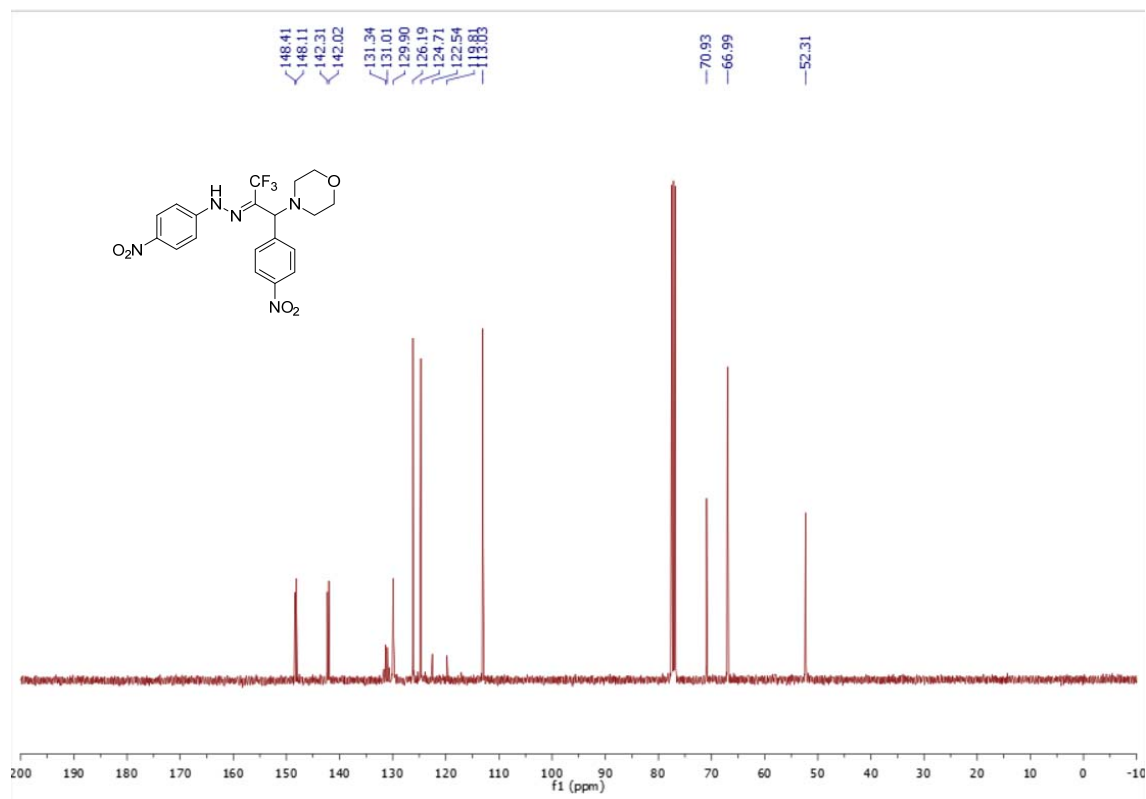

Compound 4e

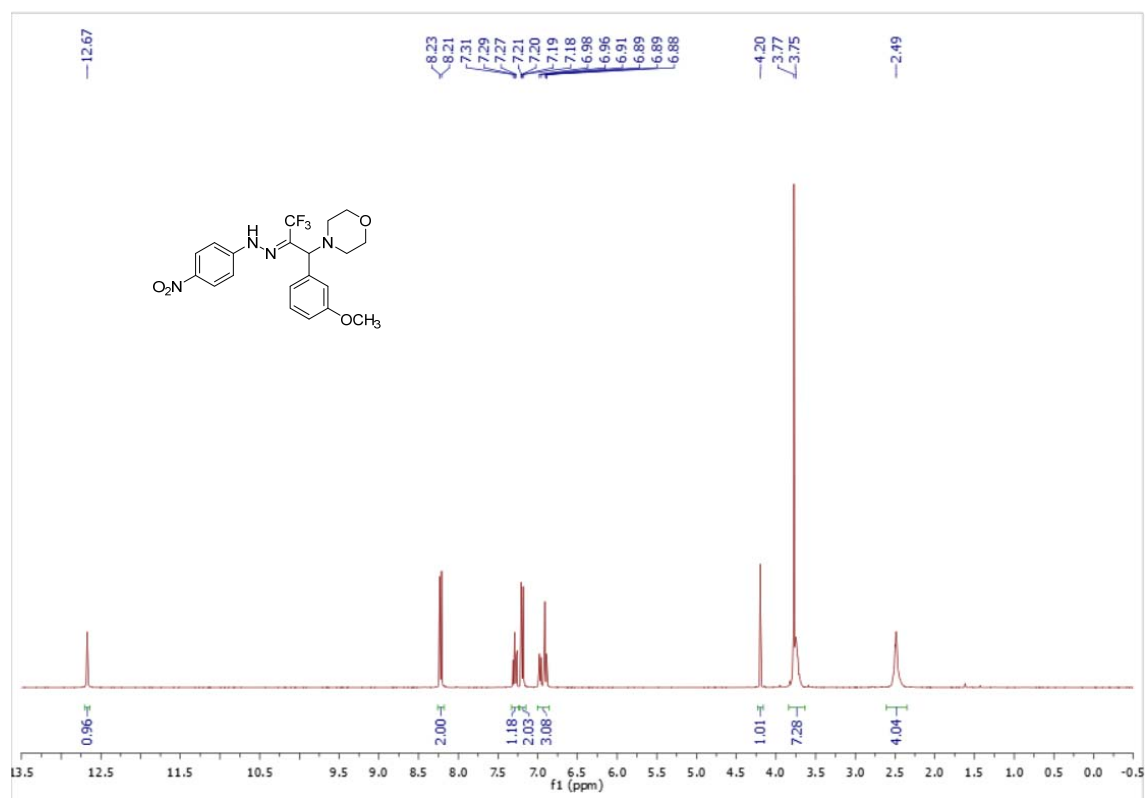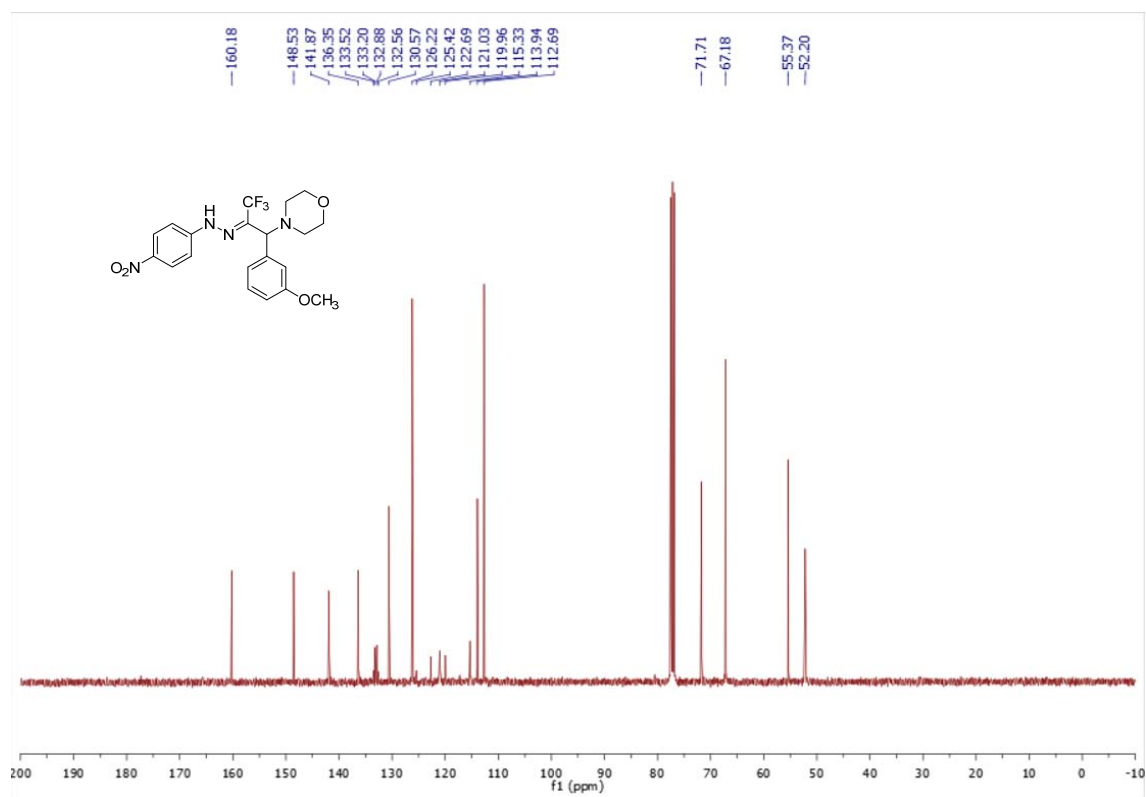

Compound 4f

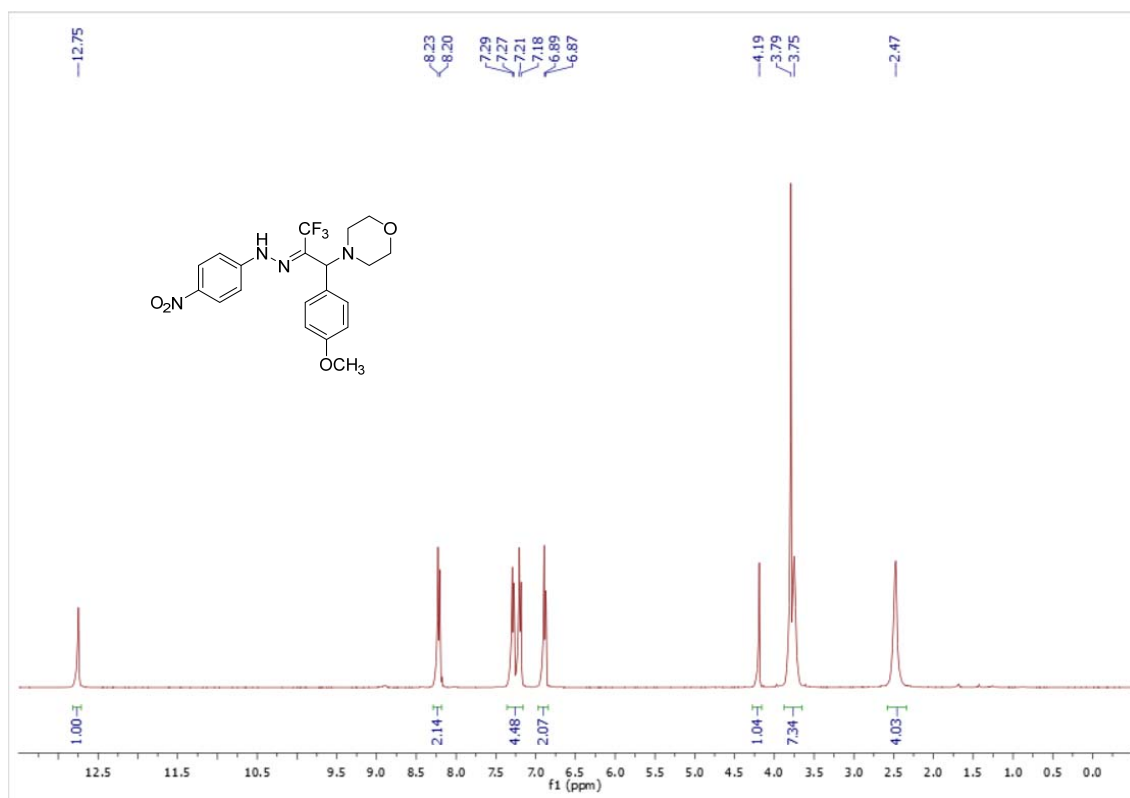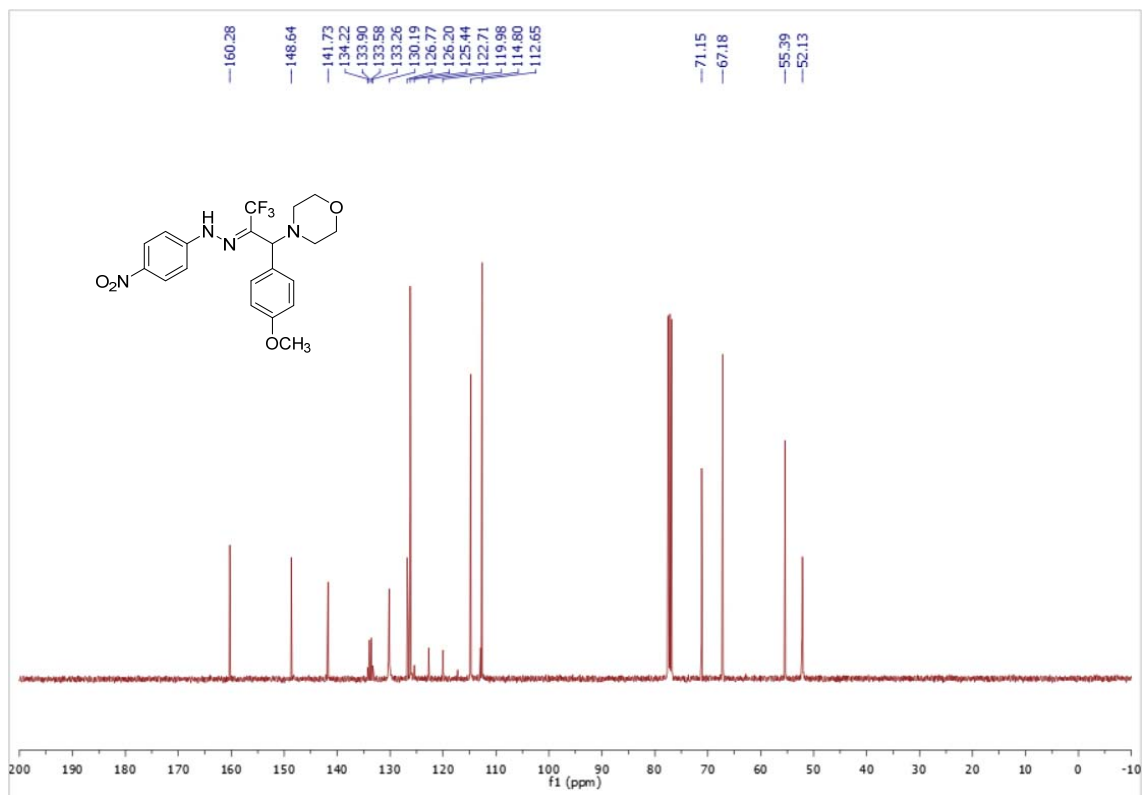



Compound 4g

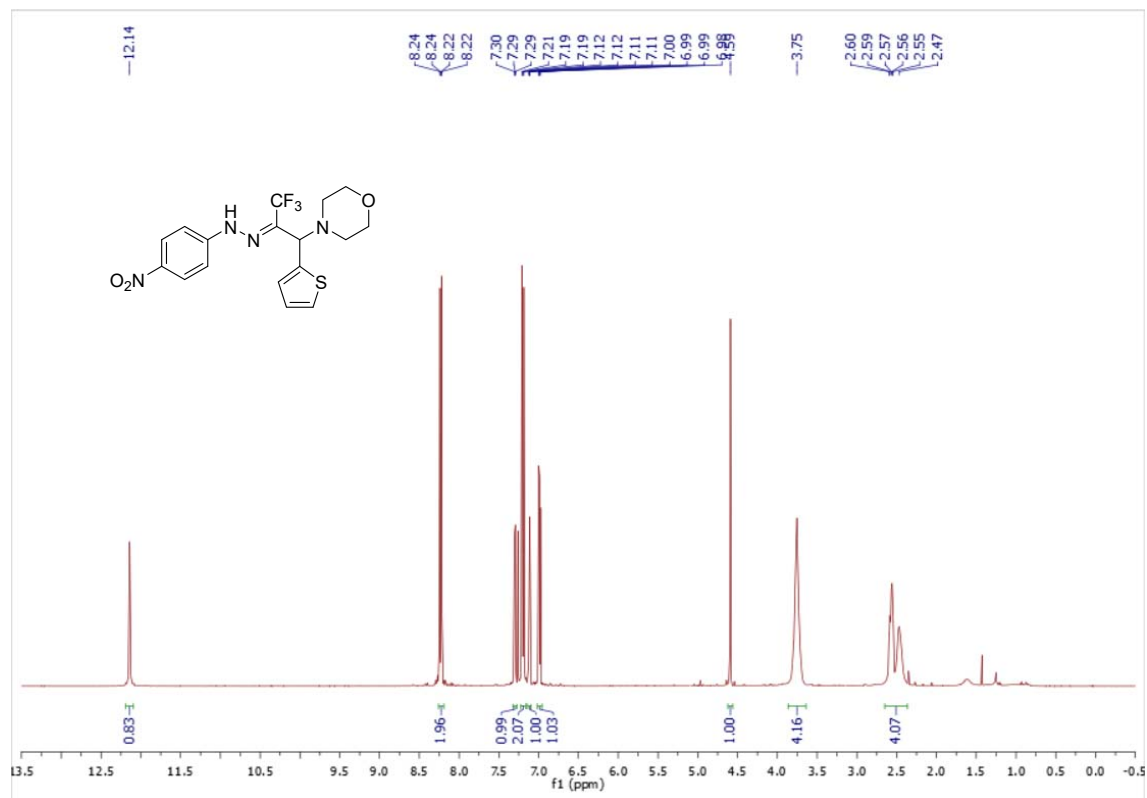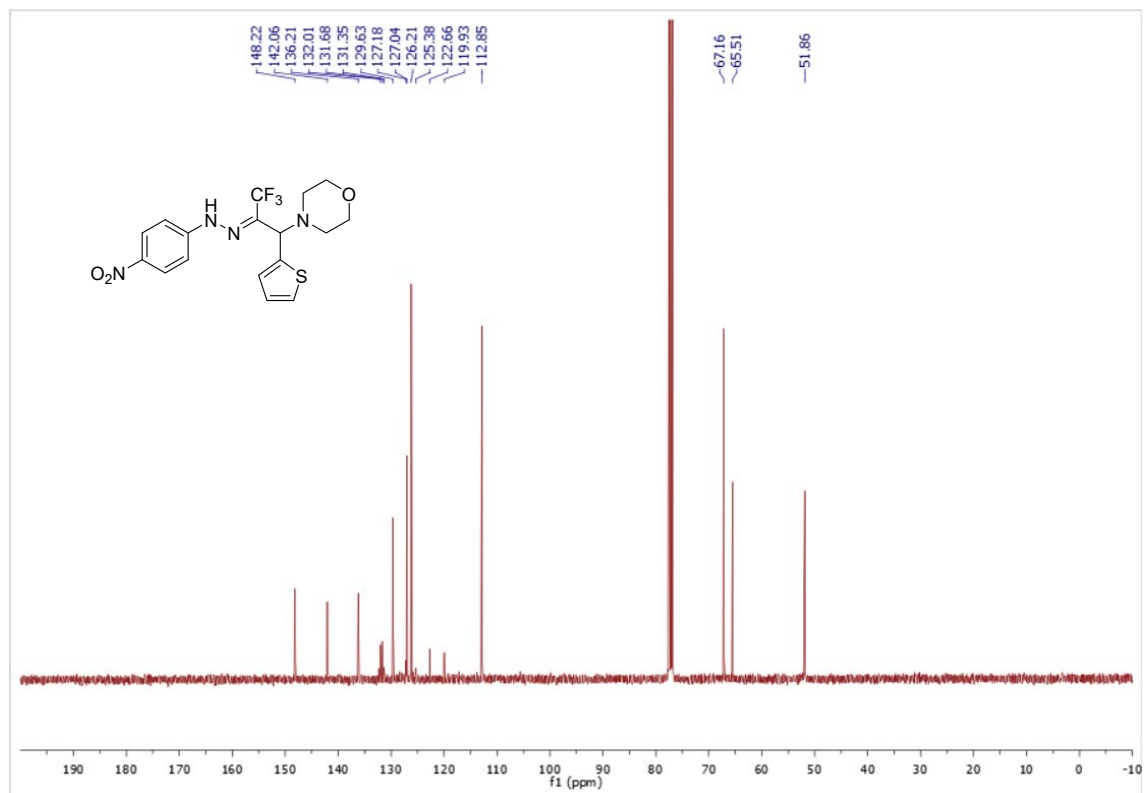

Compound 4h

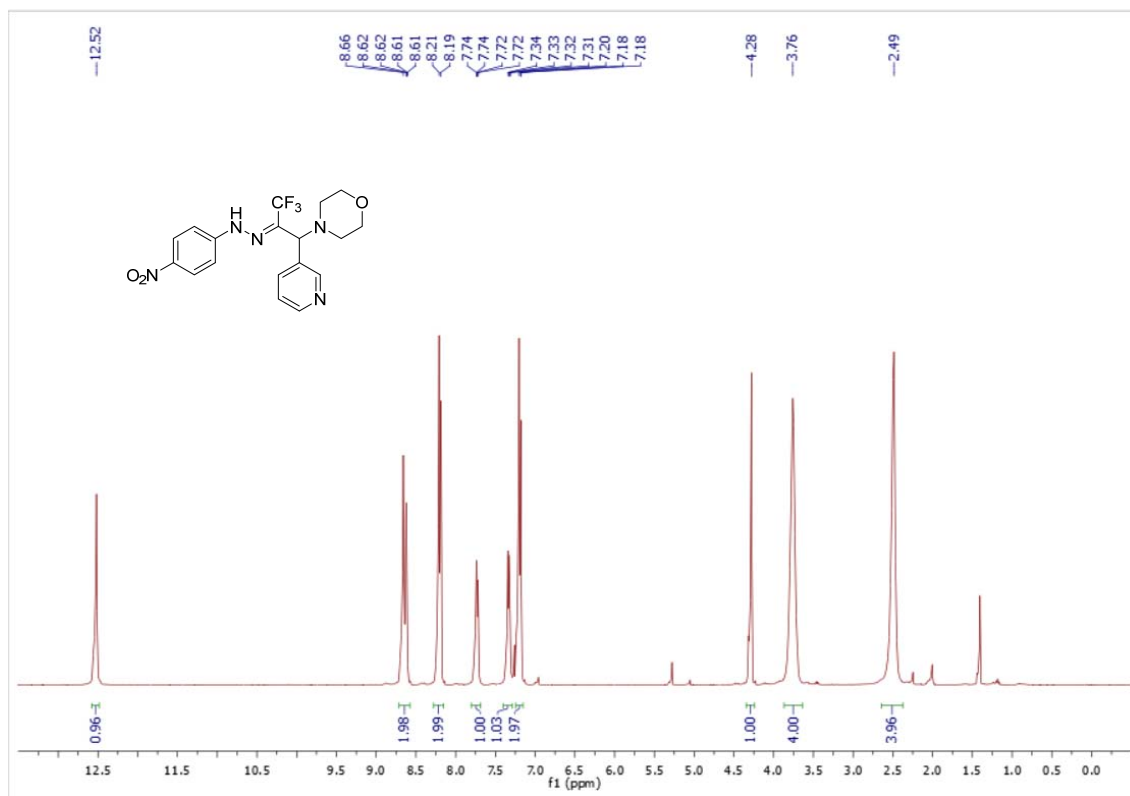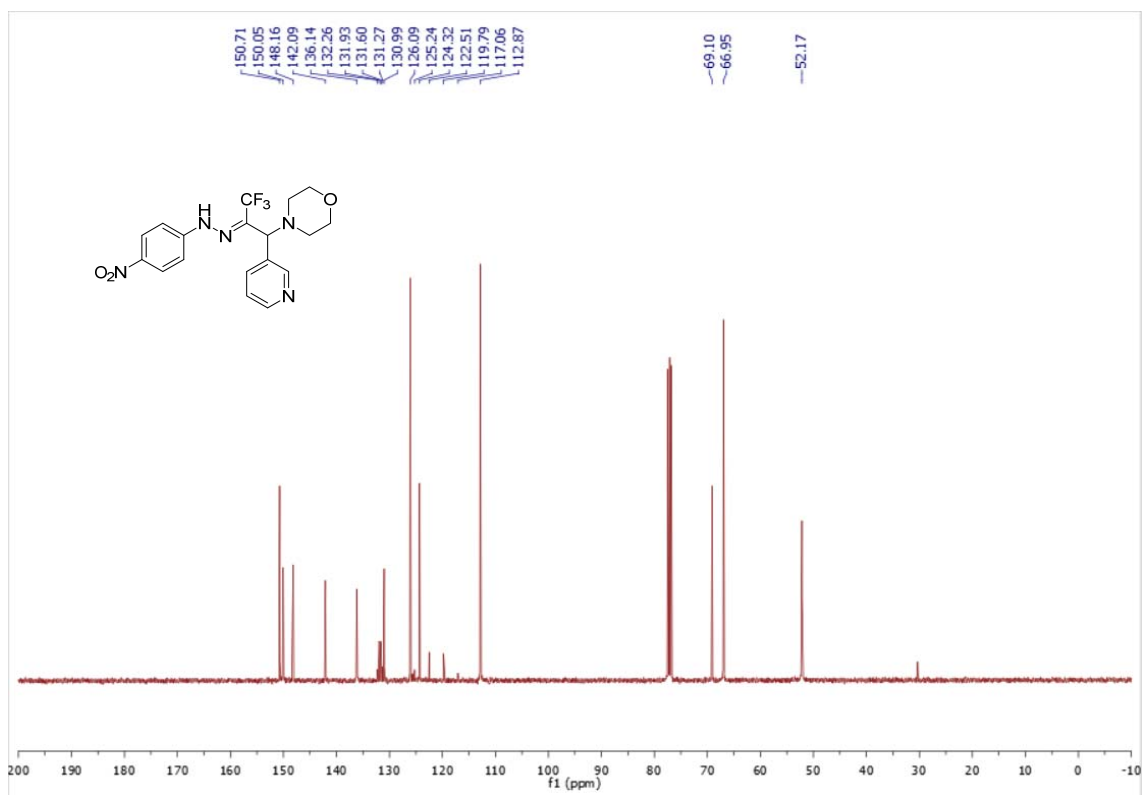

Compound 4i

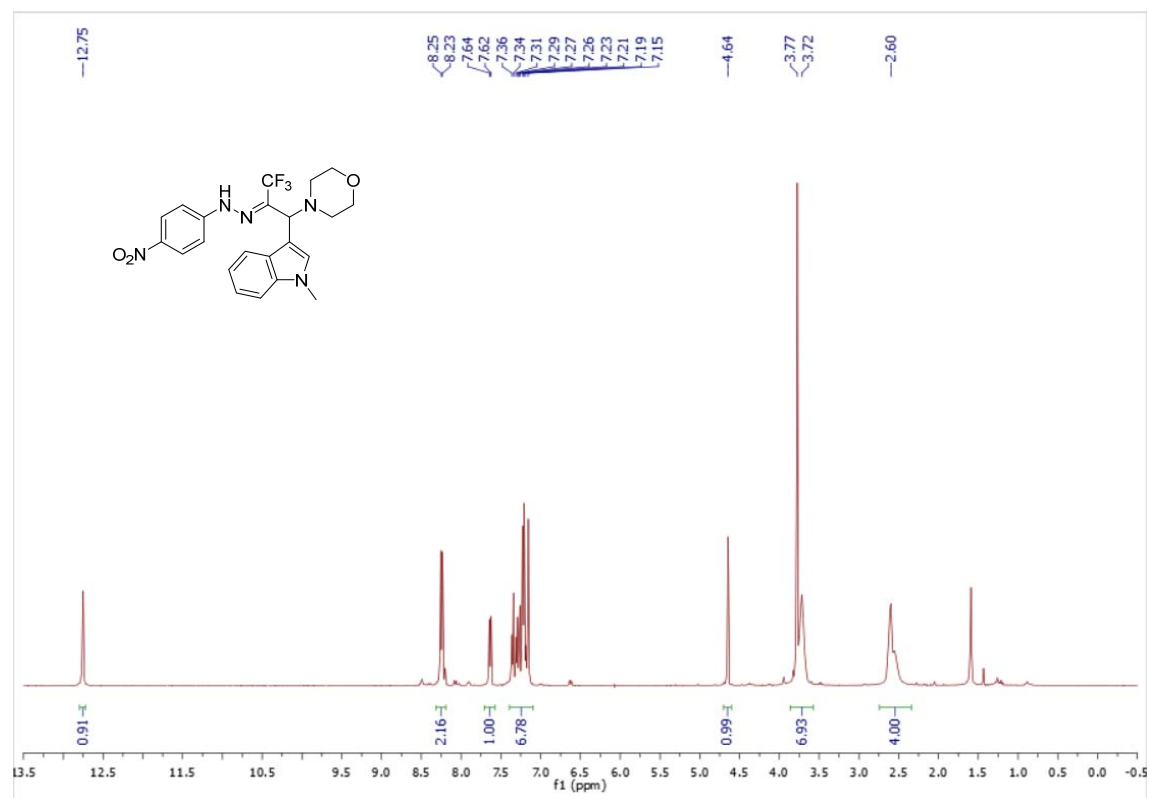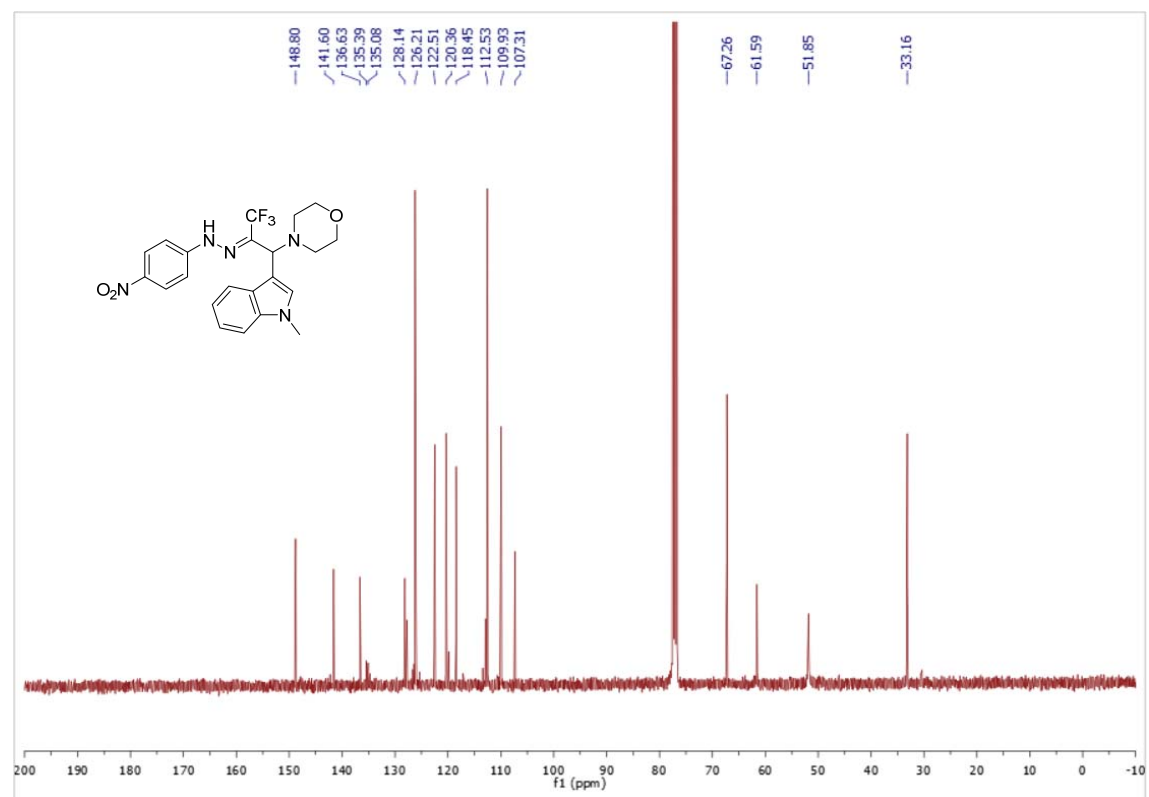

Compound 4j

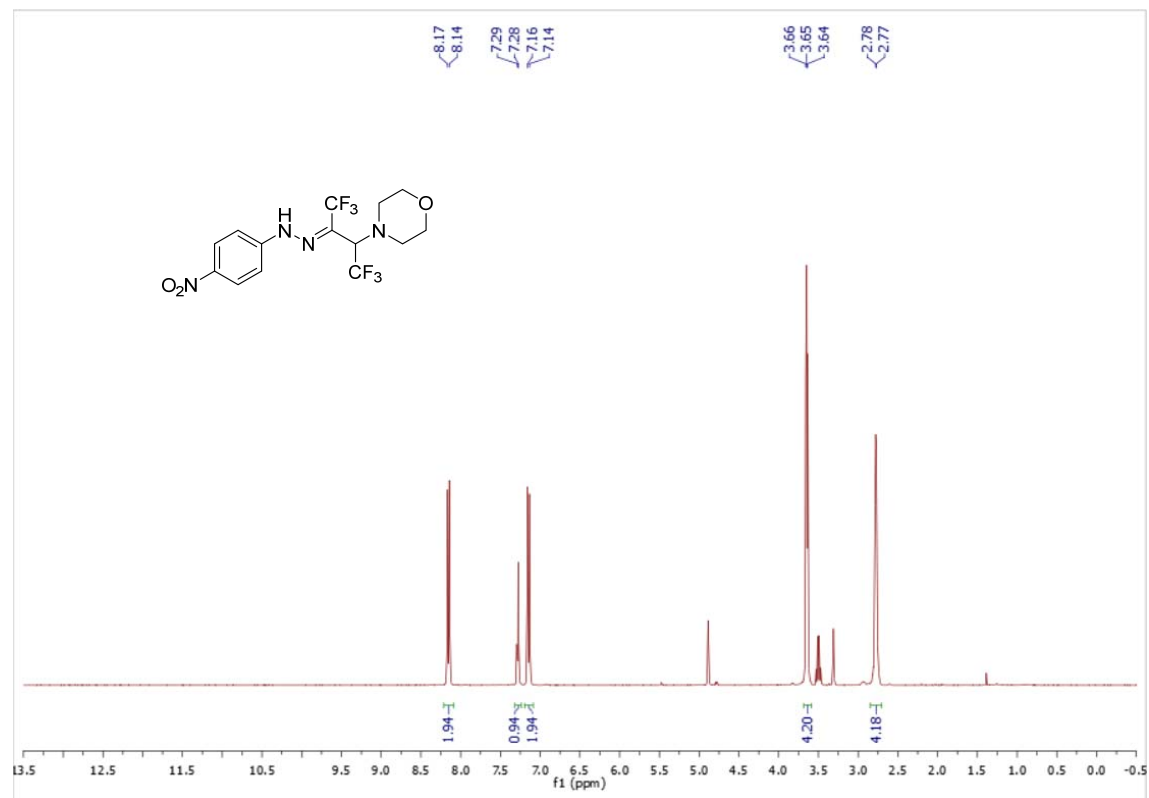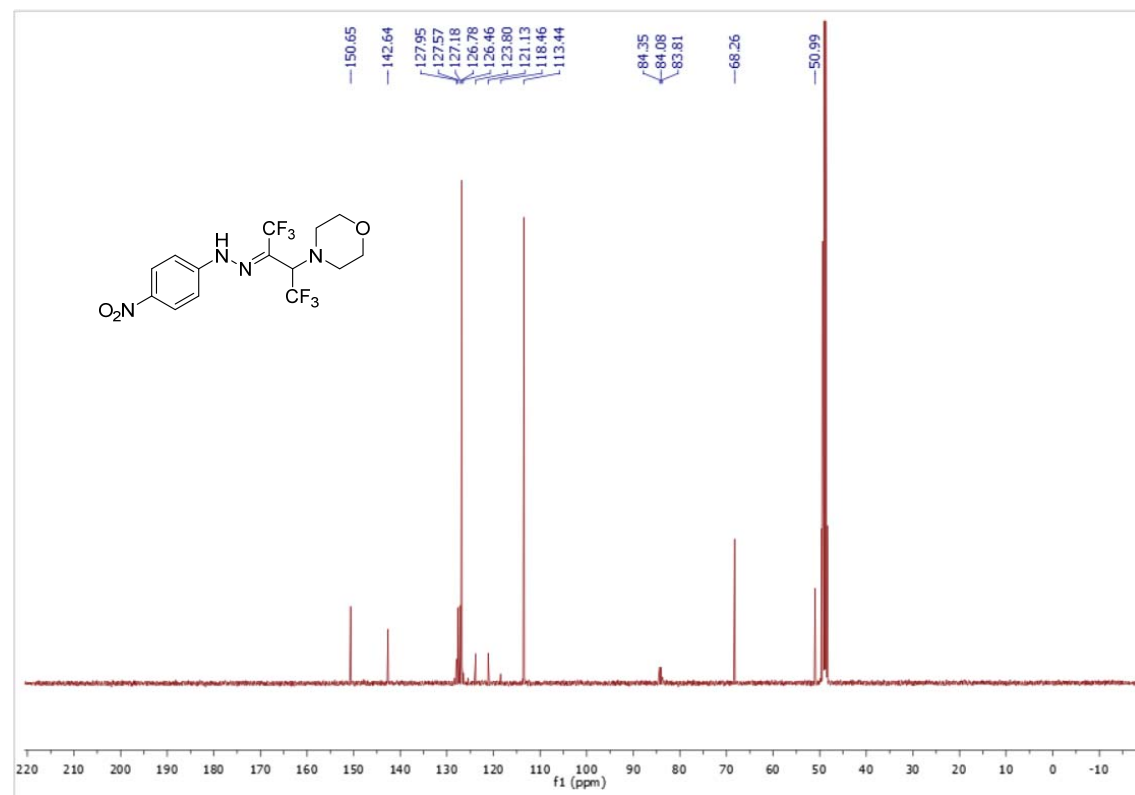

Compound 4k

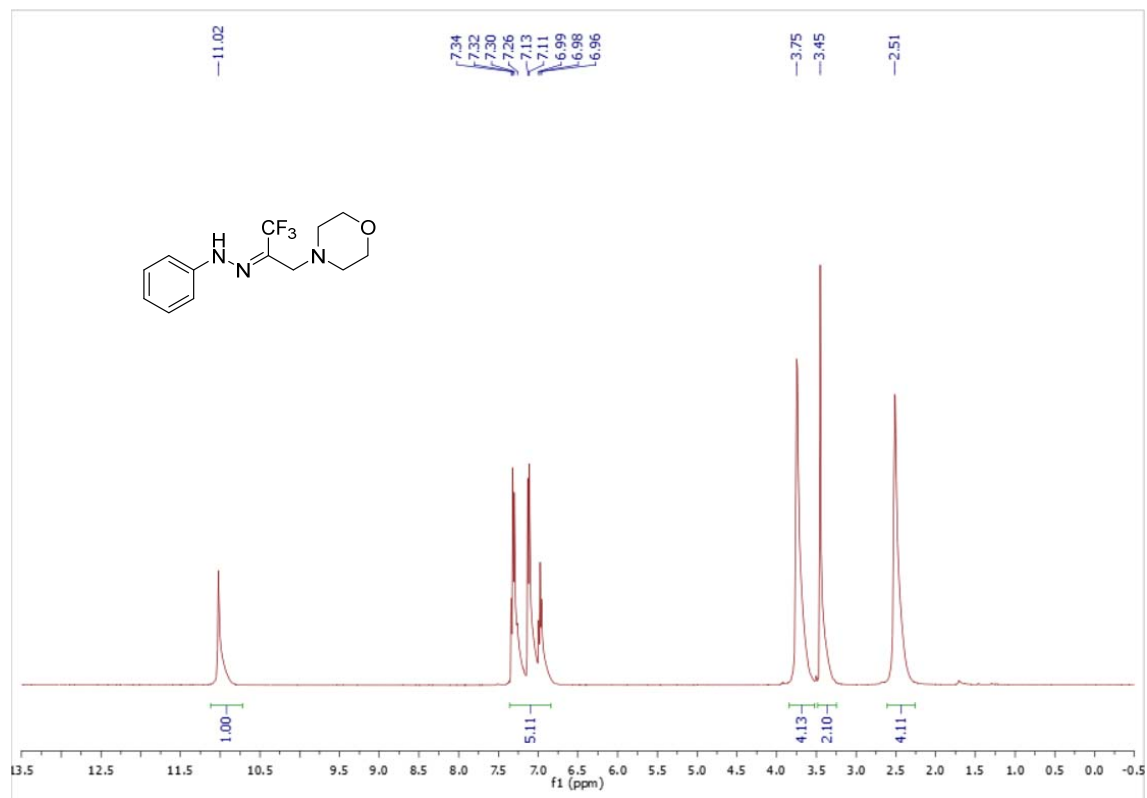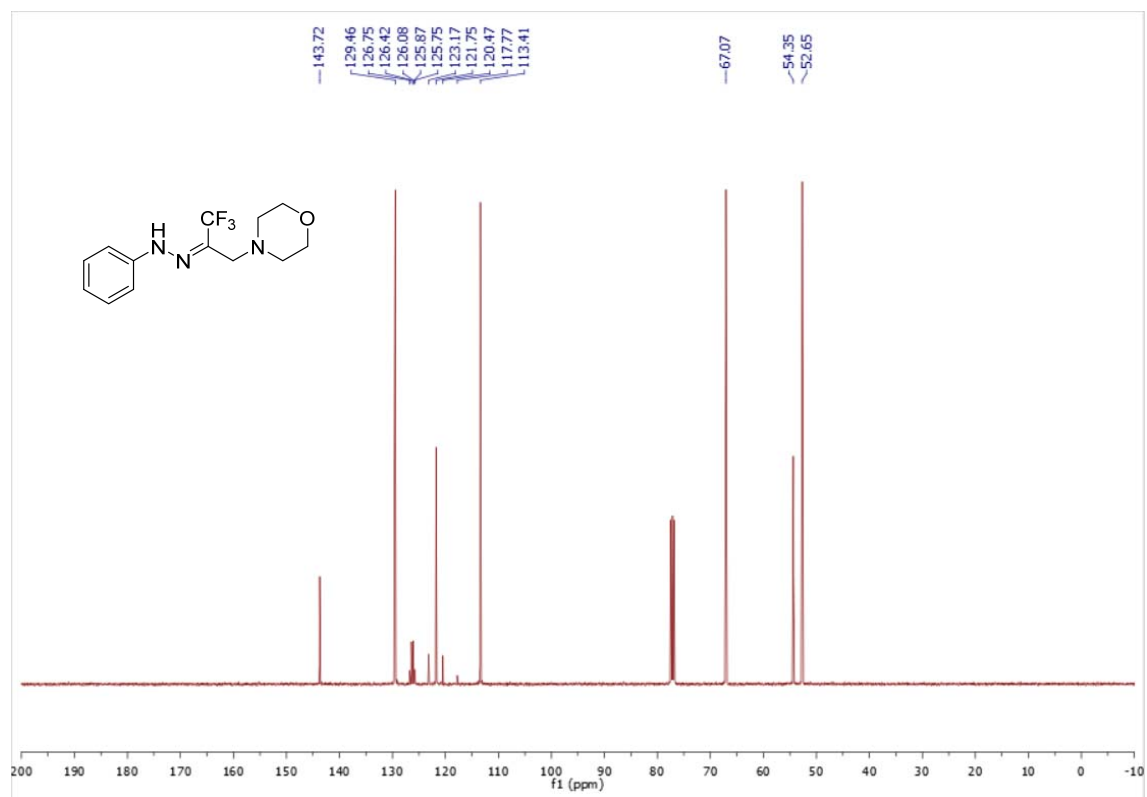

Compound 4l

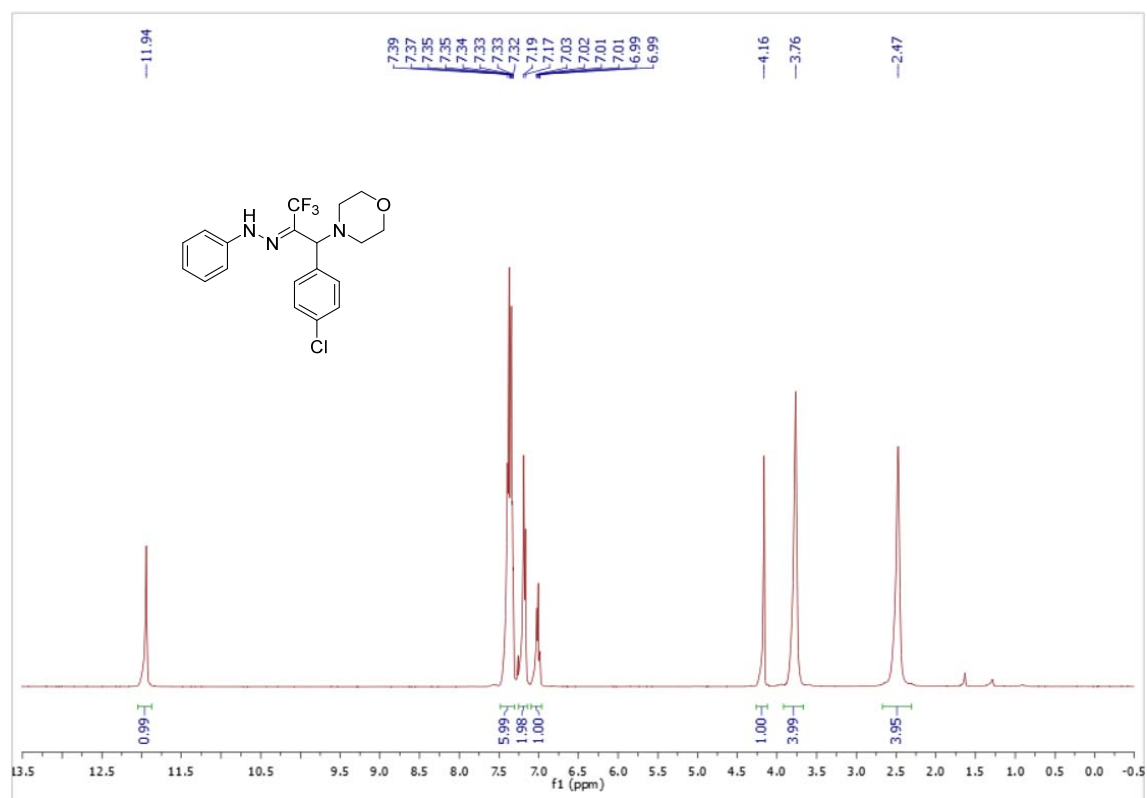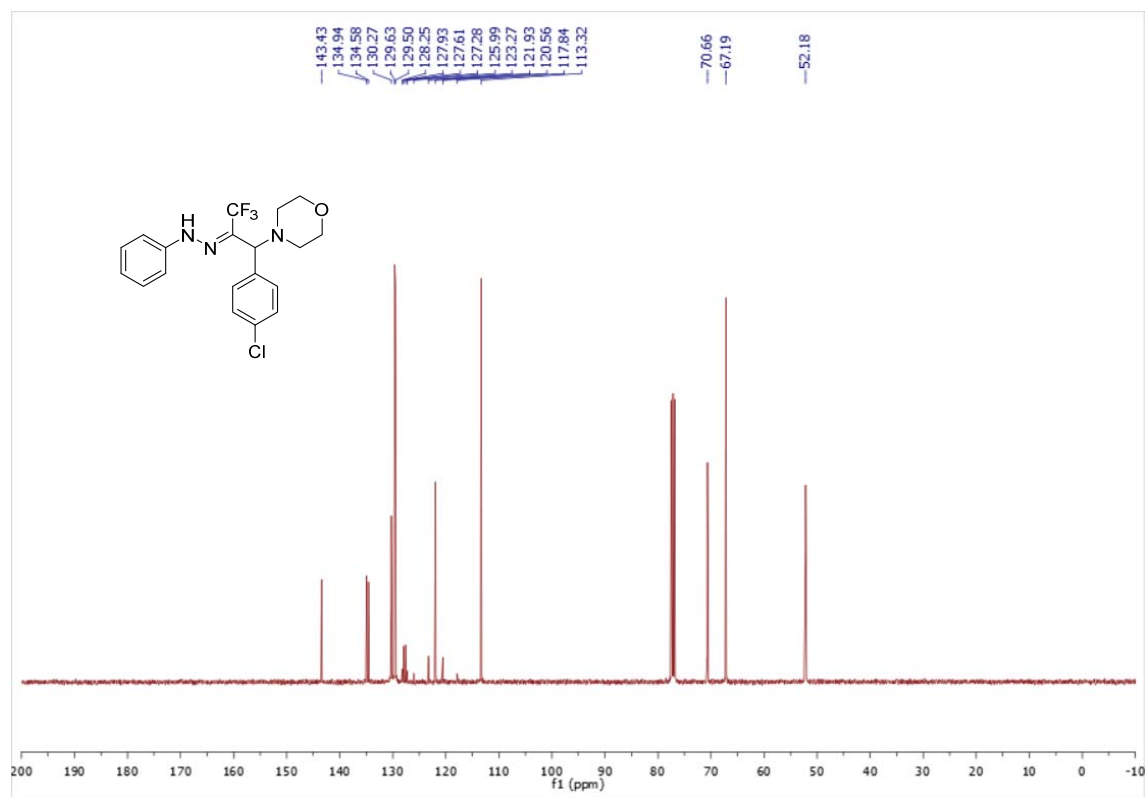

Compound 4m

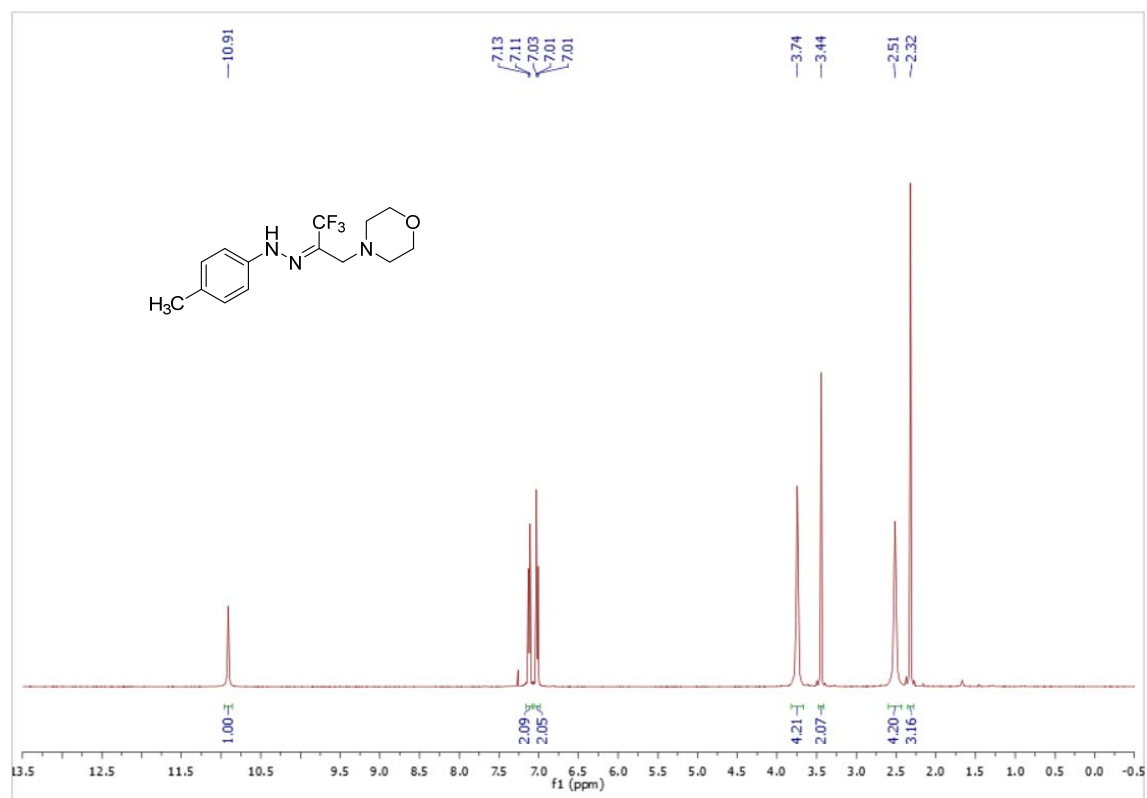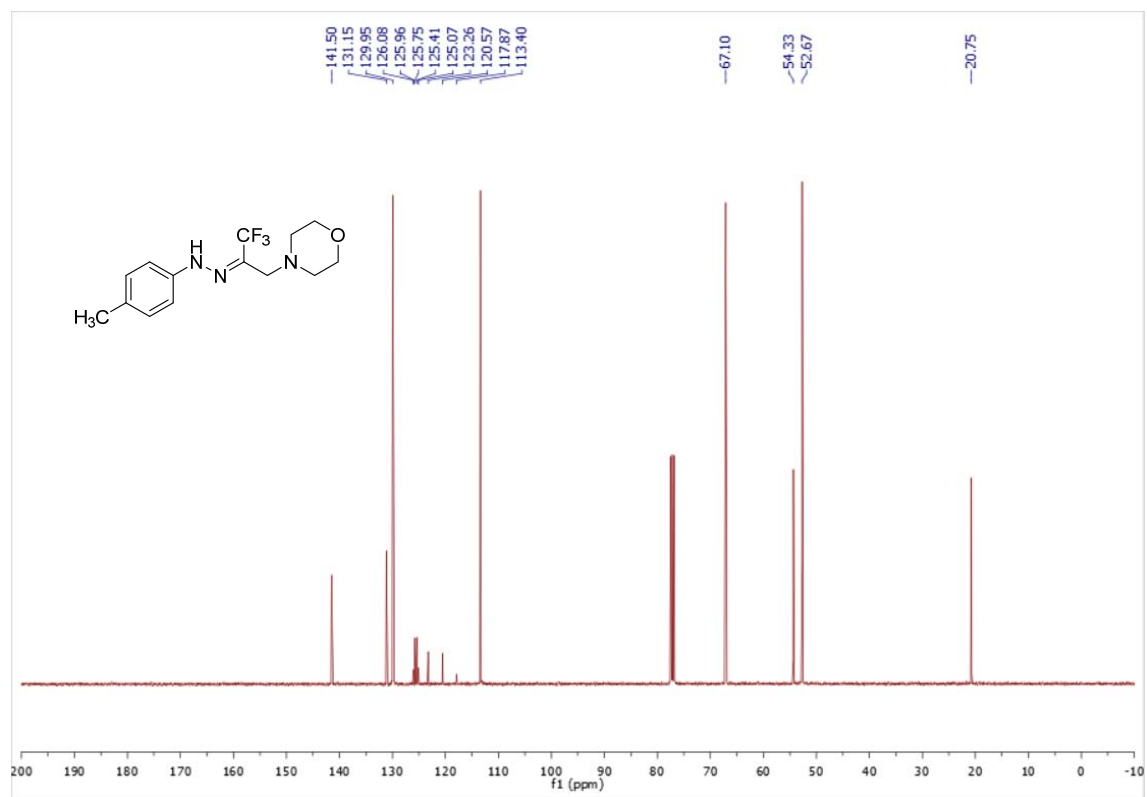

Compound 4n

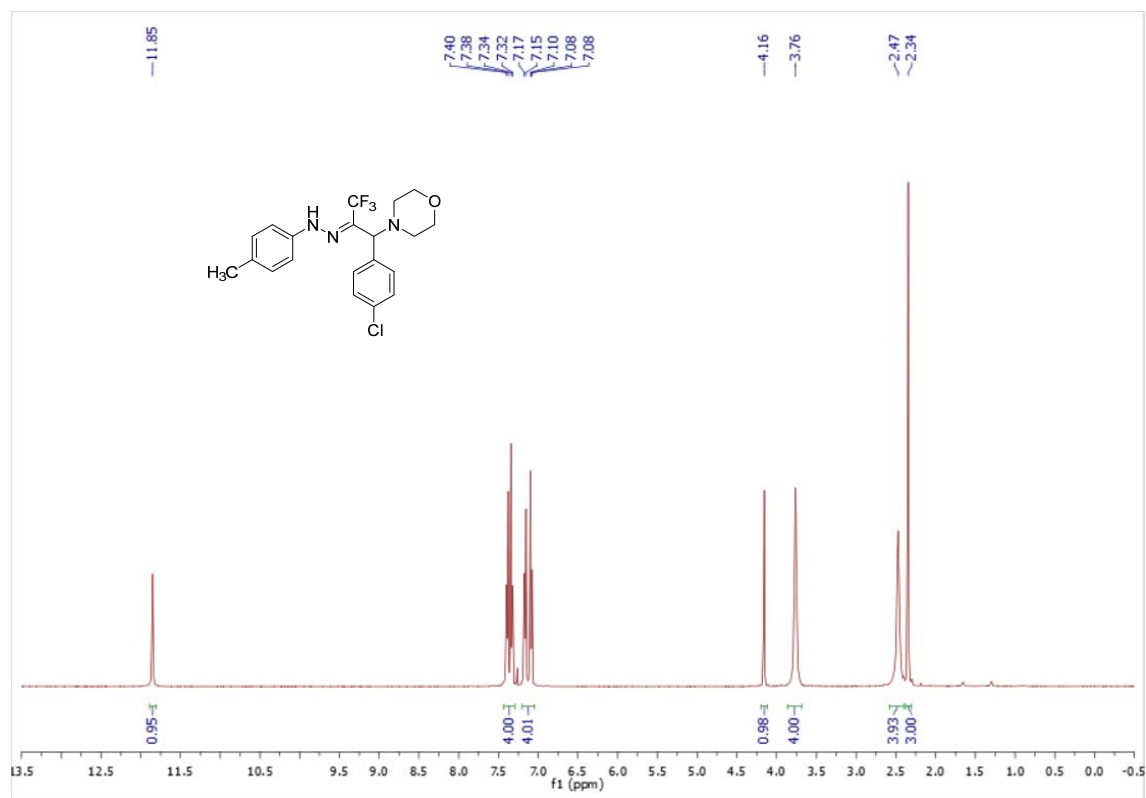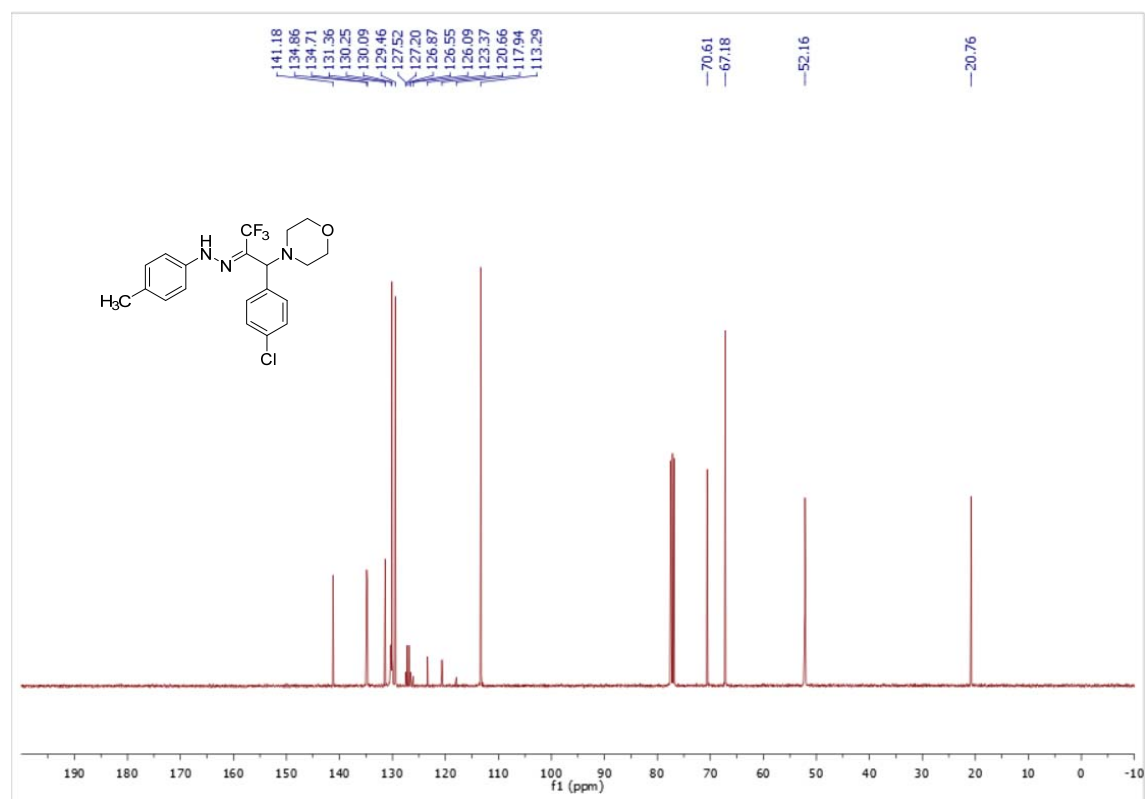



Compound 4o

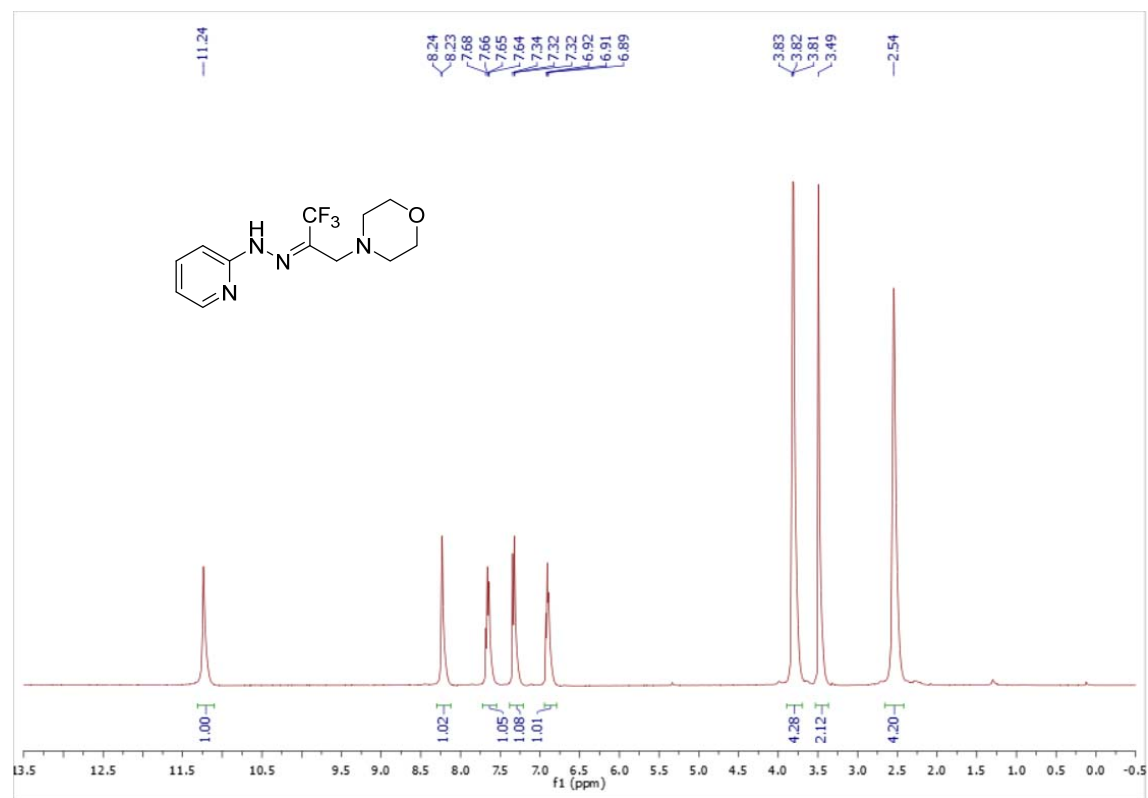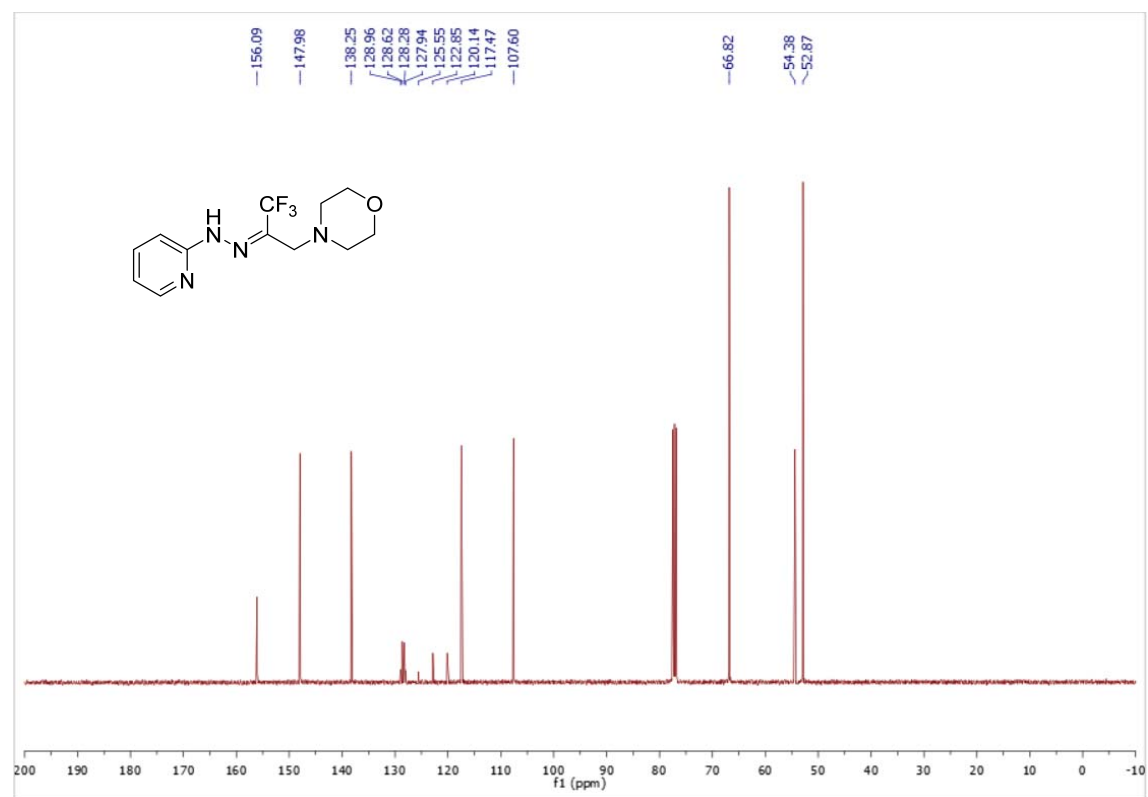

Compound 4p

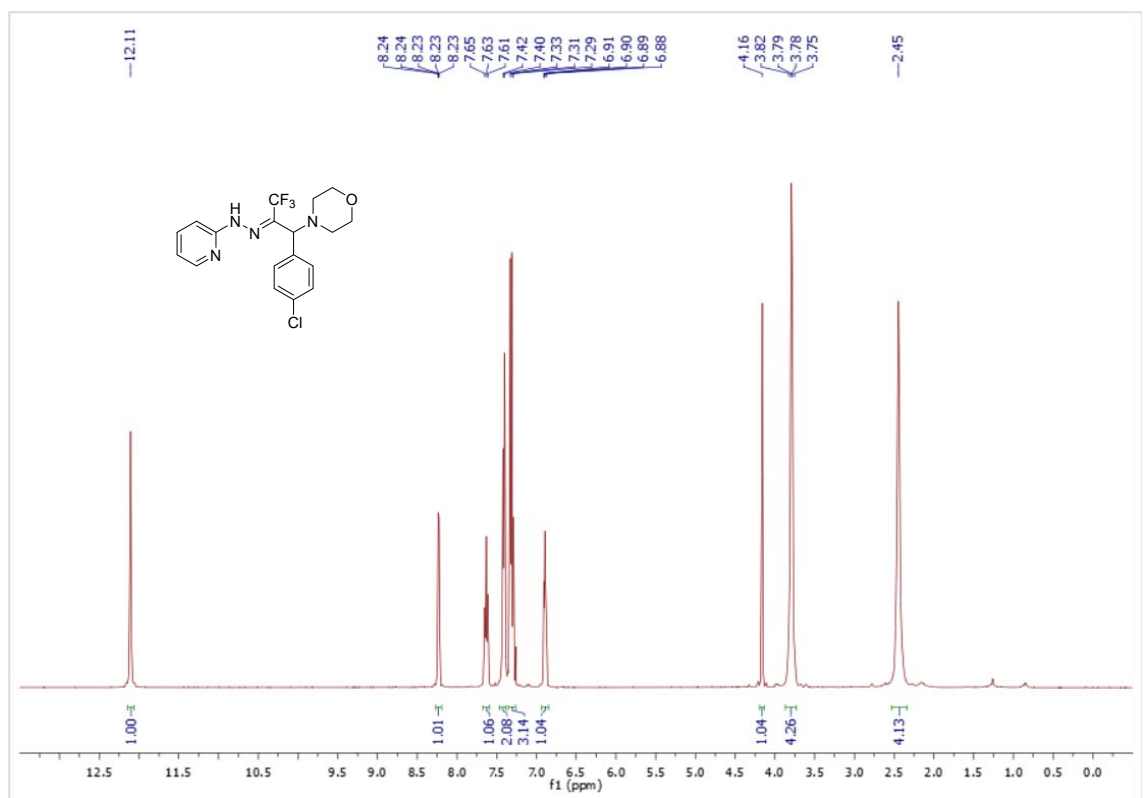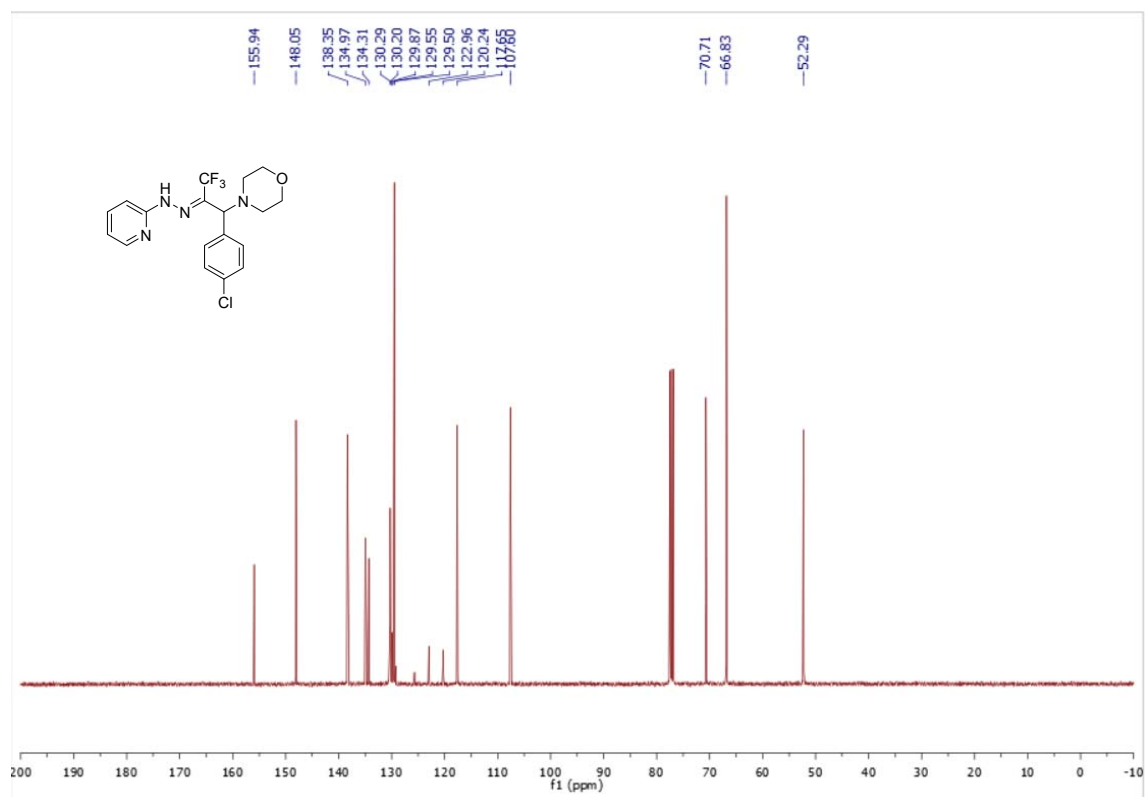

Compound 4q

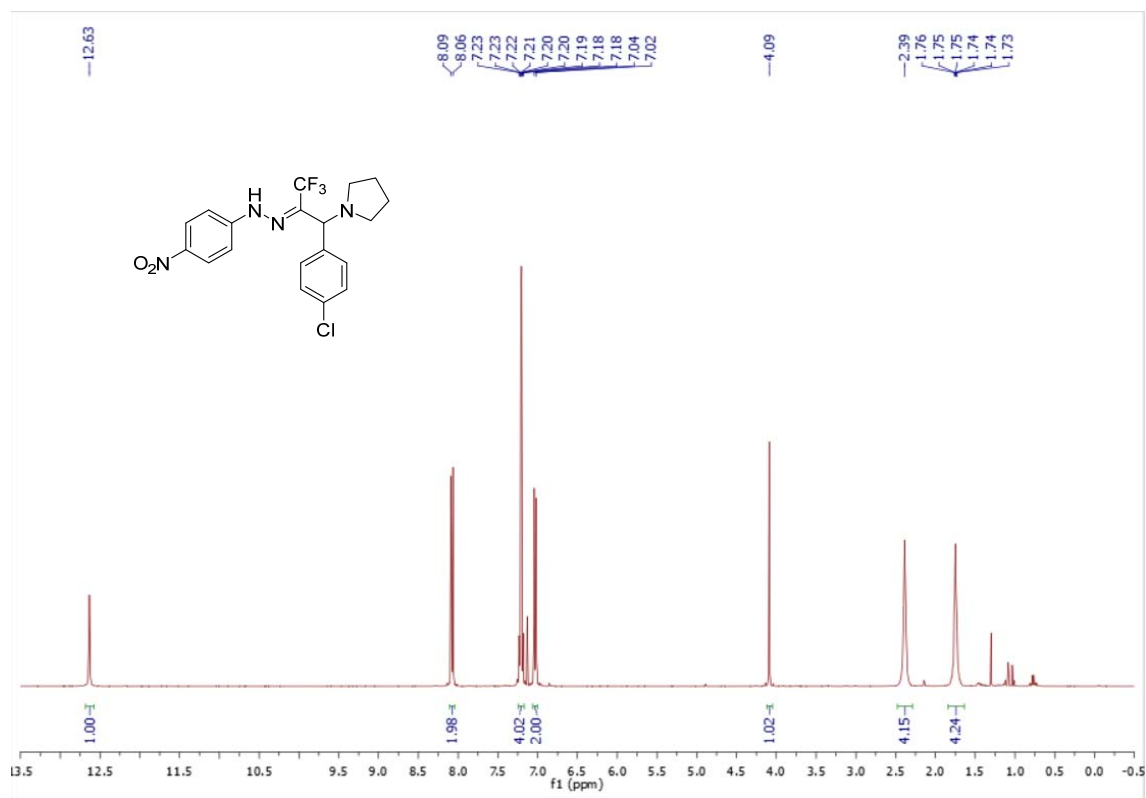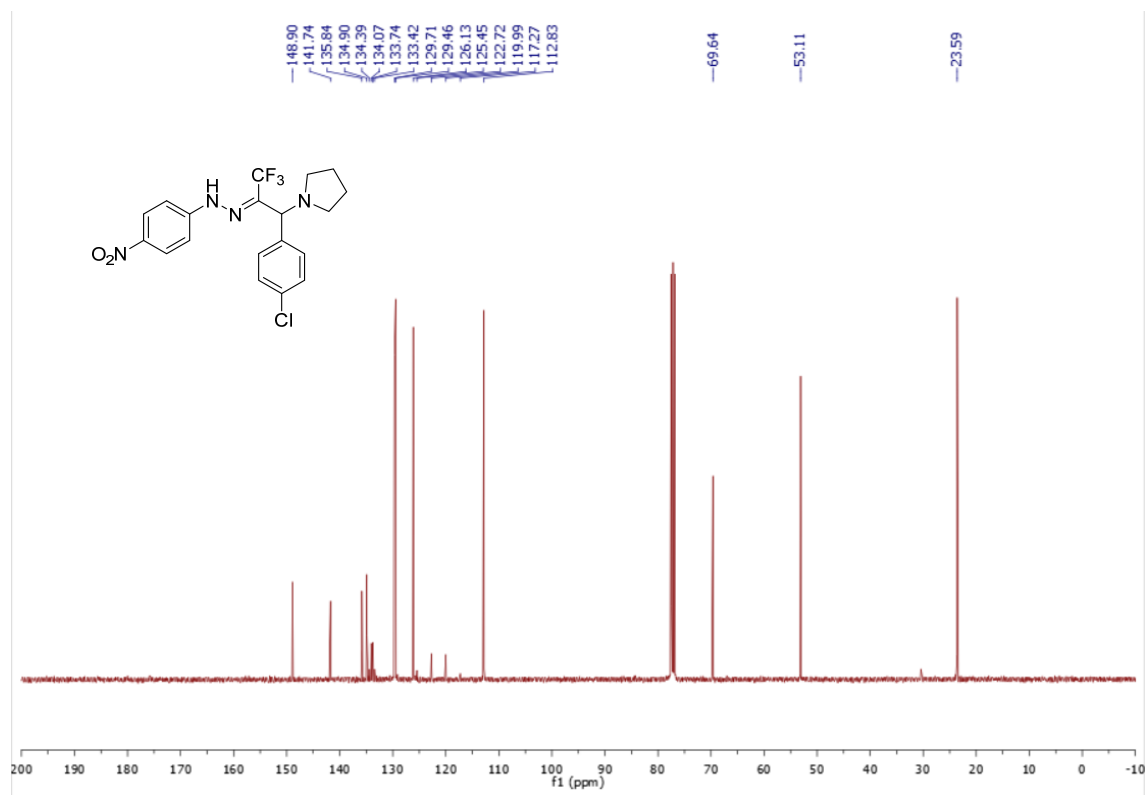

Compound 4r

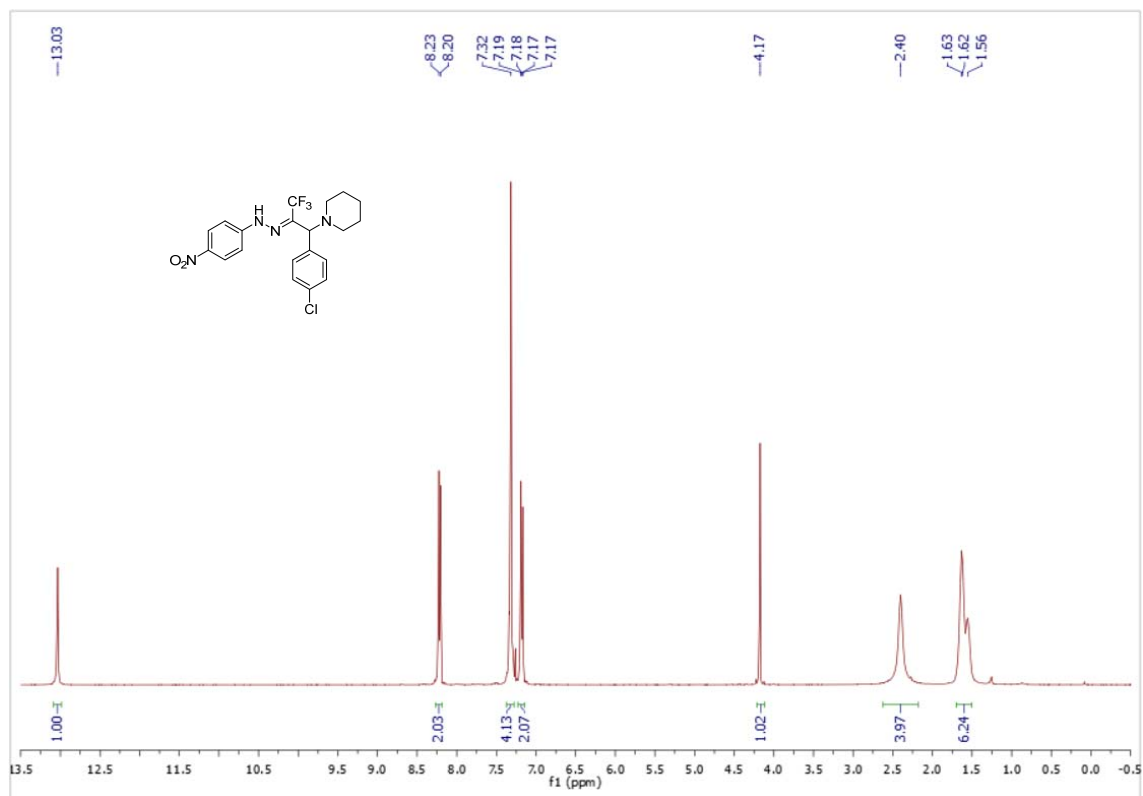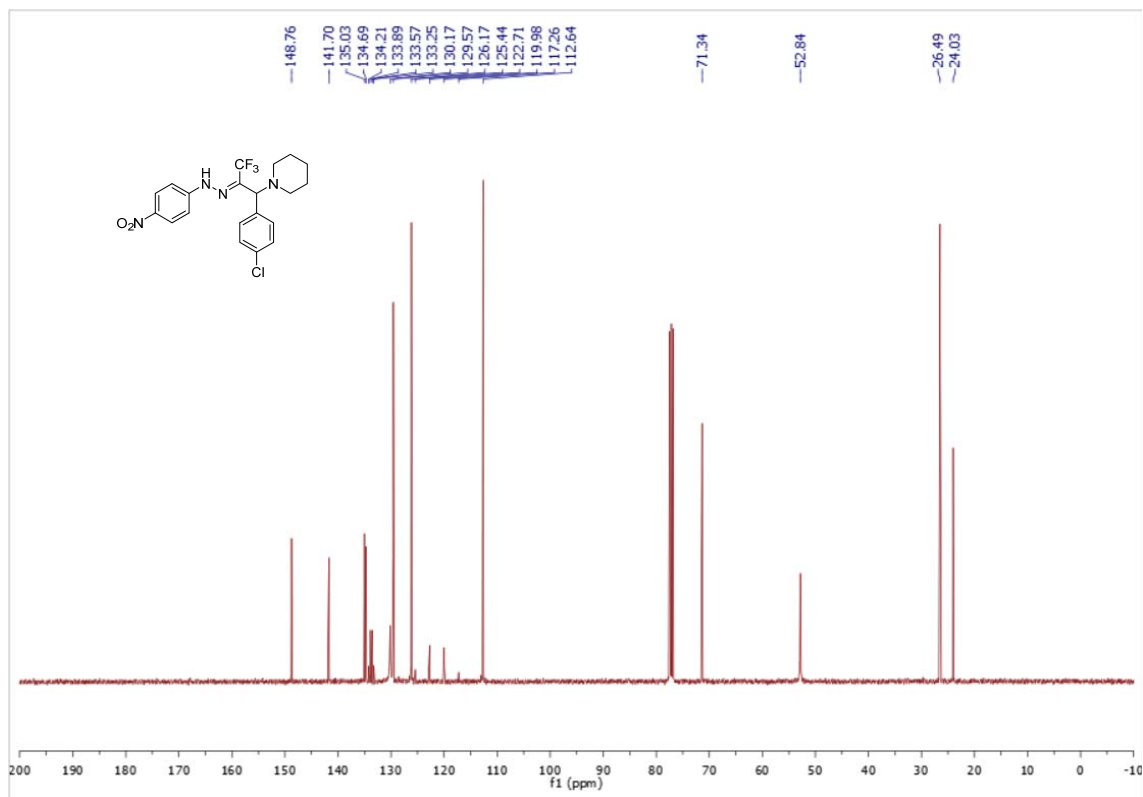

Compound 4s

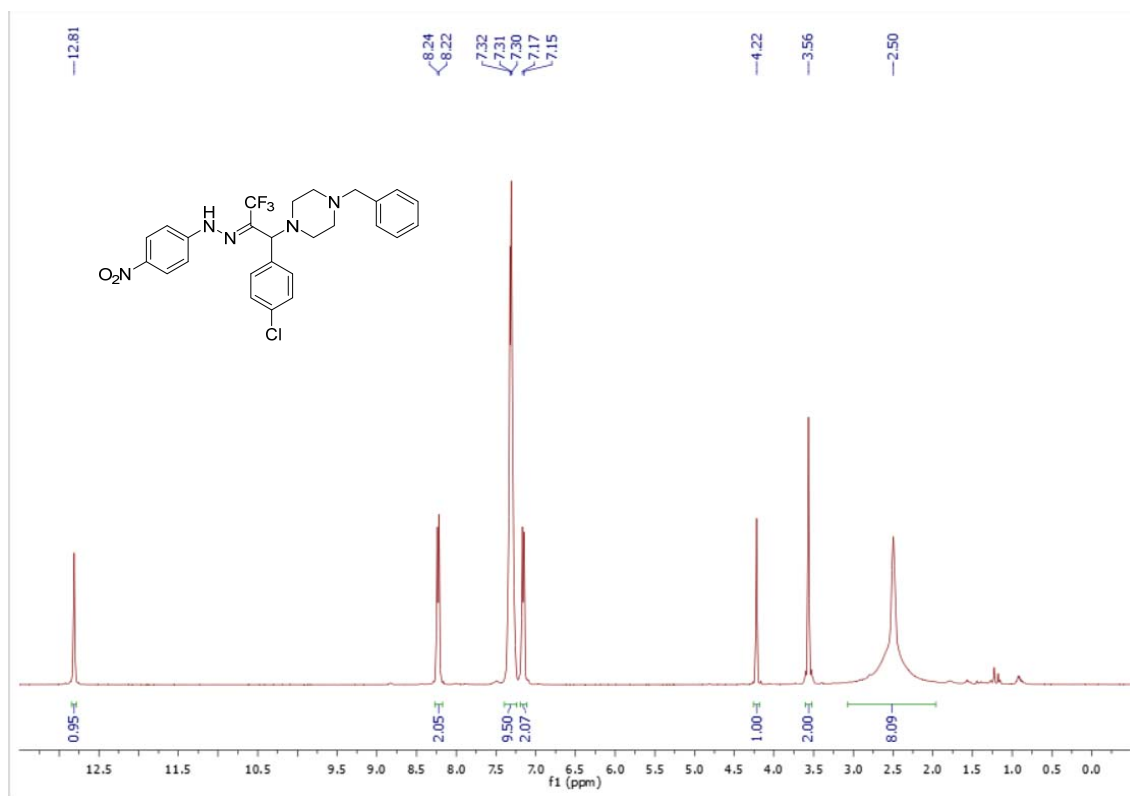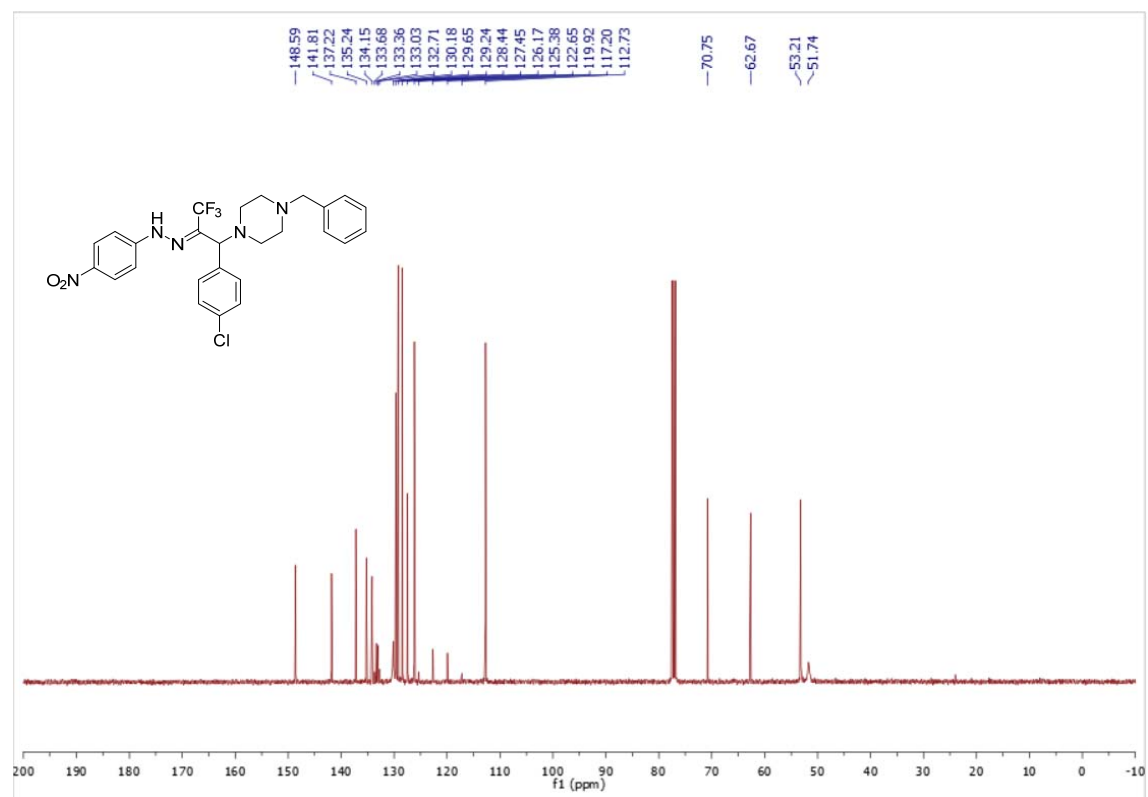

Compound 4t

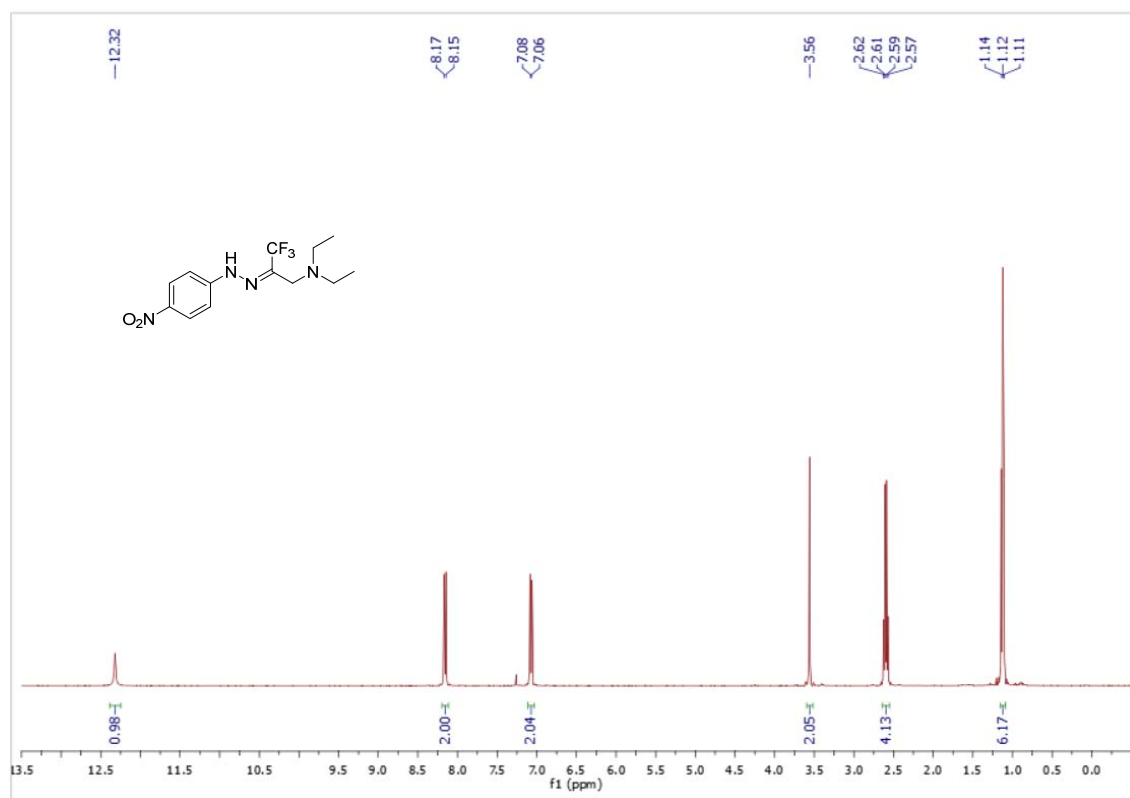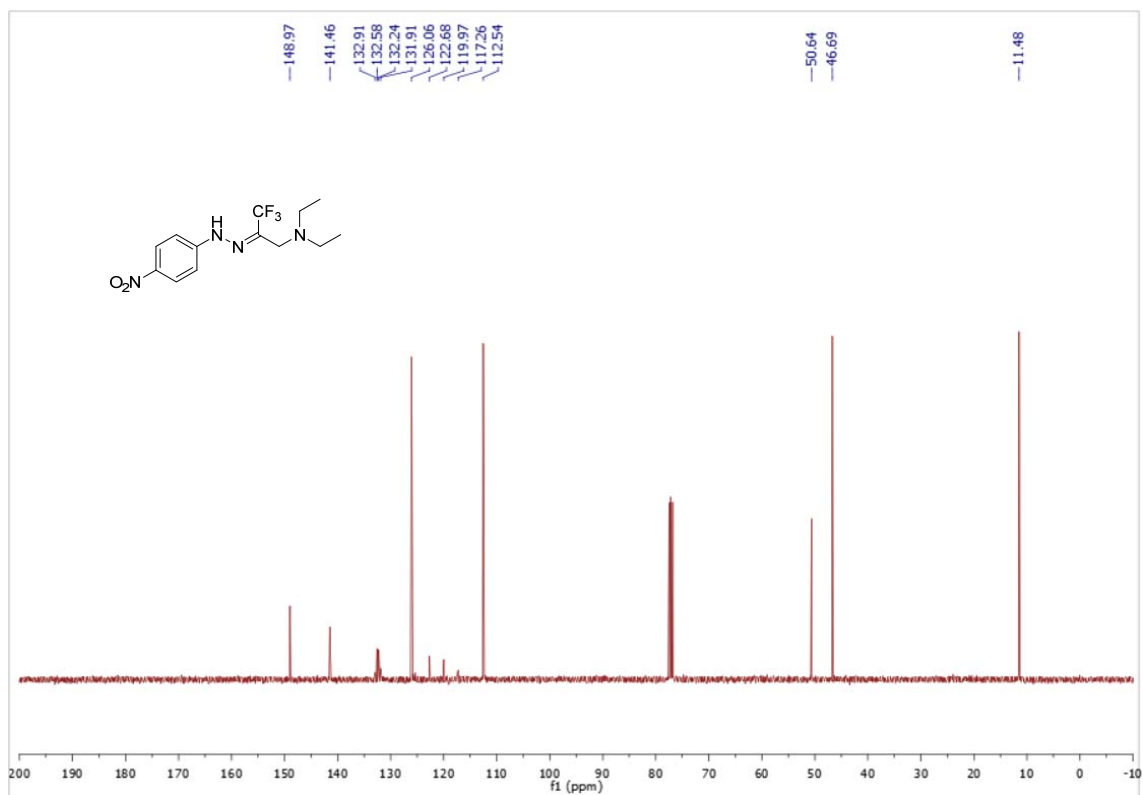

Compound 4u

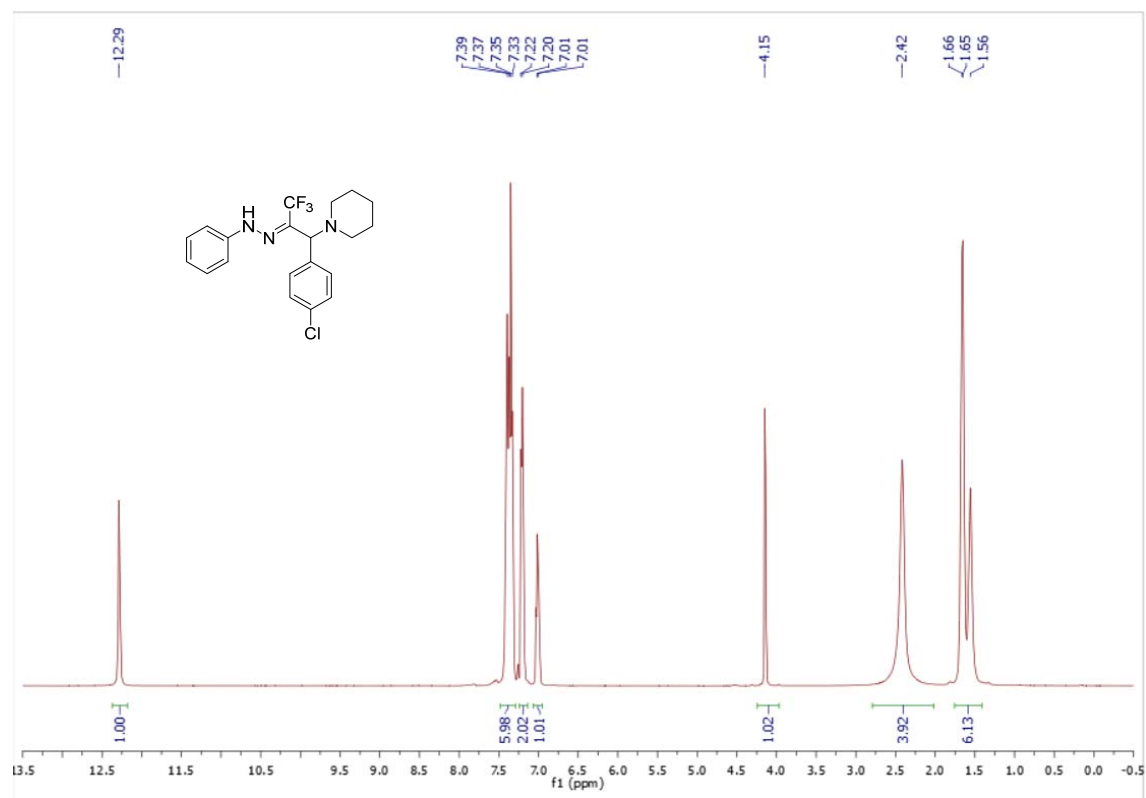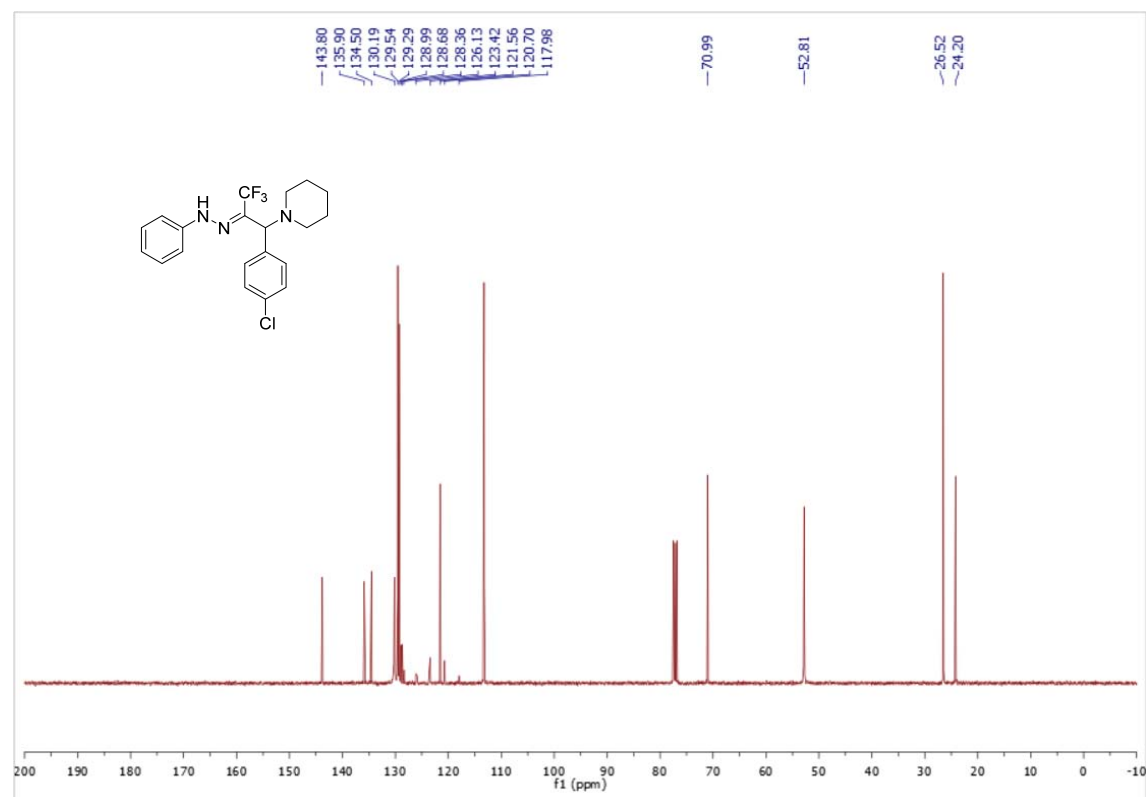

Compound 4v

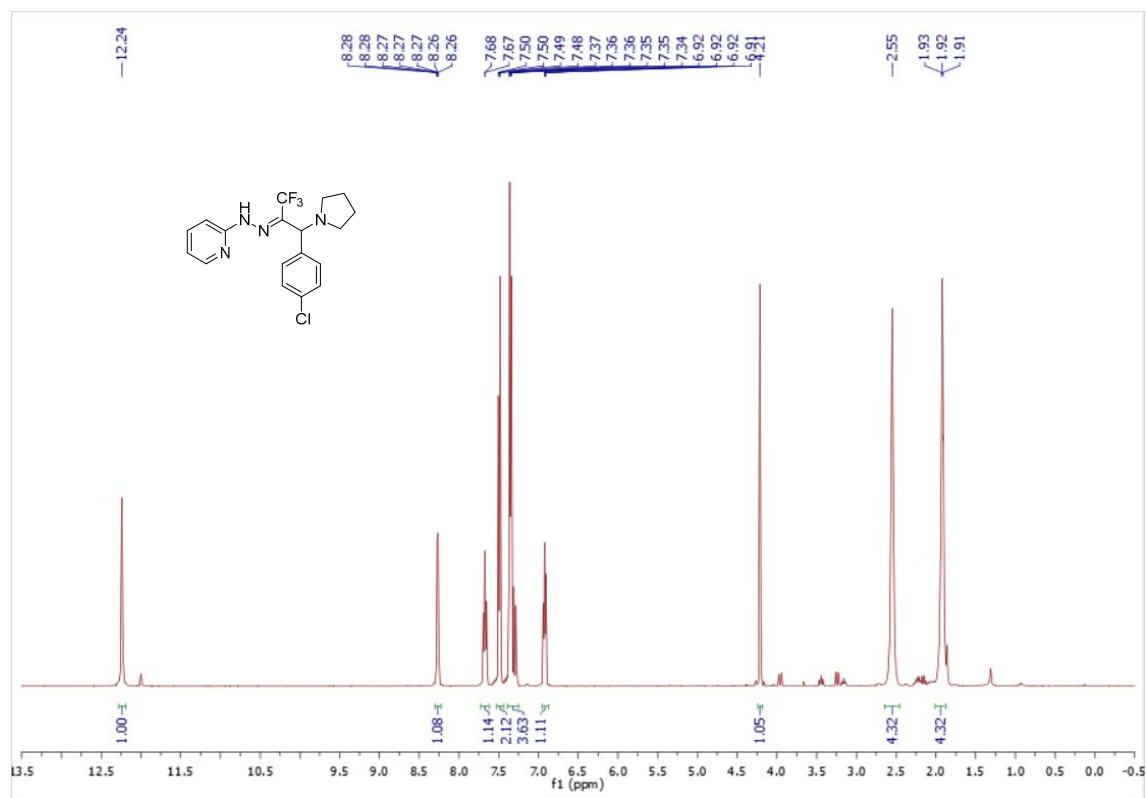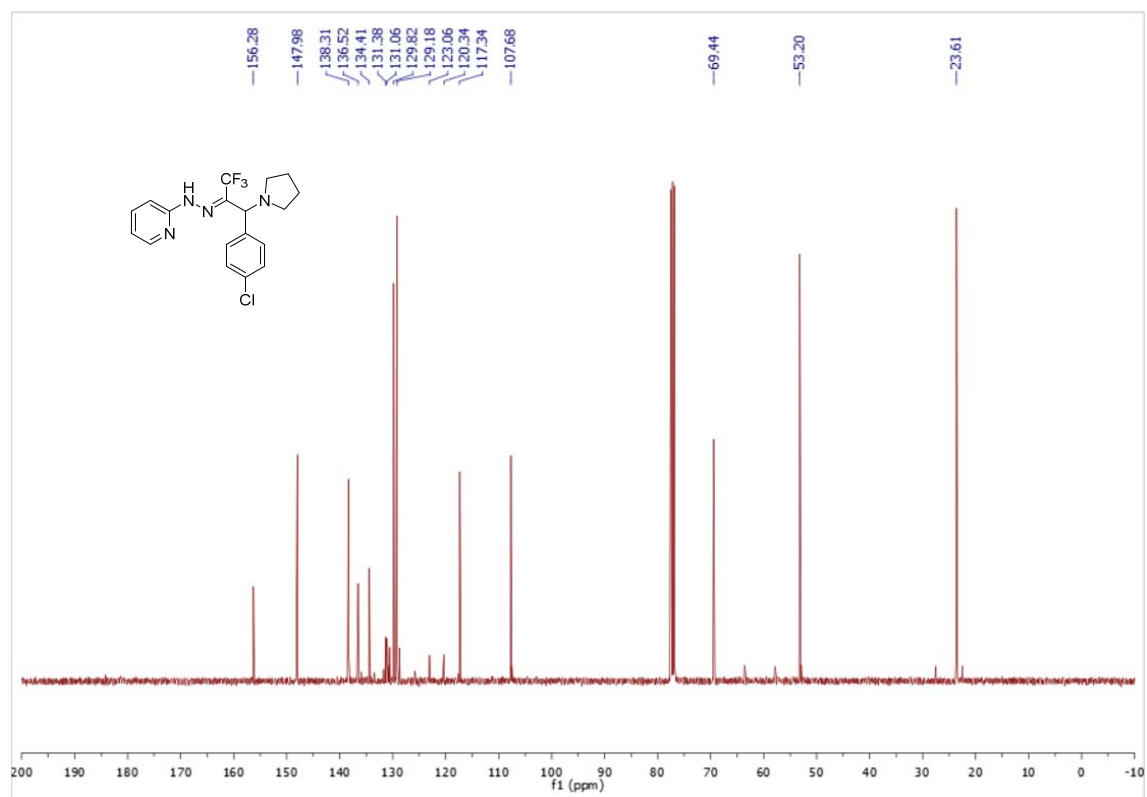



Compound 5a

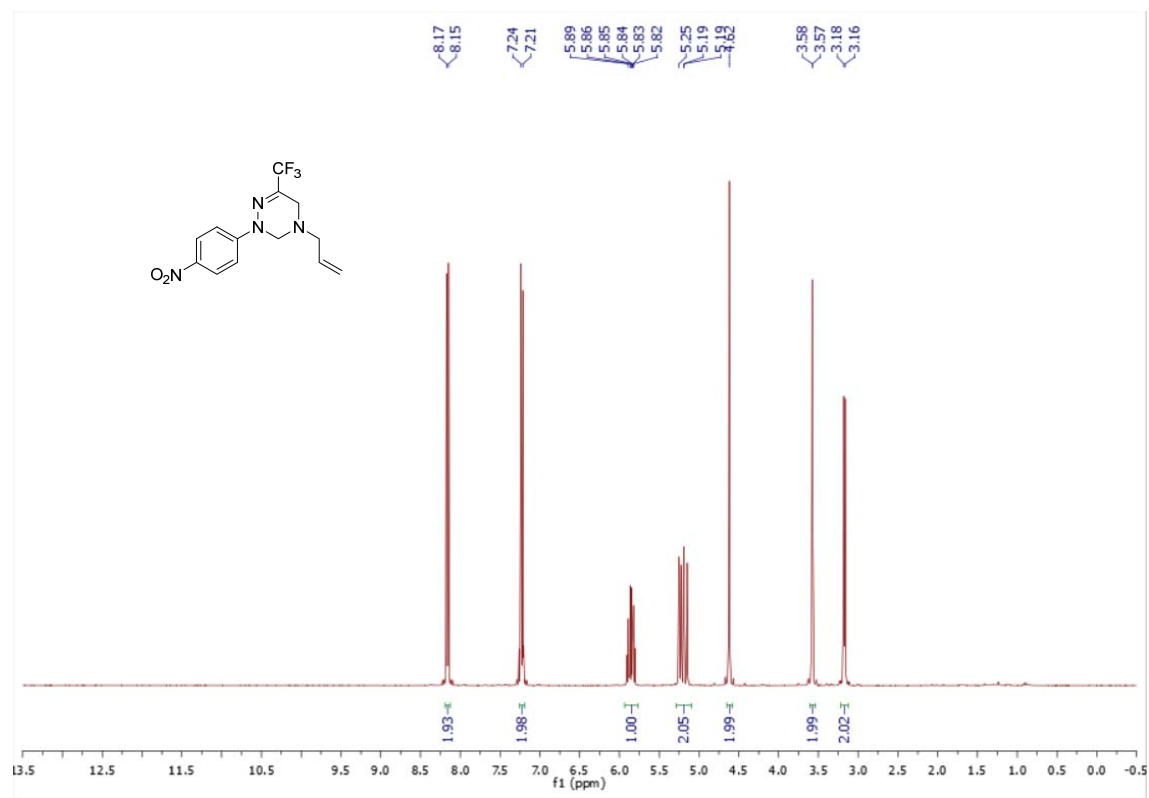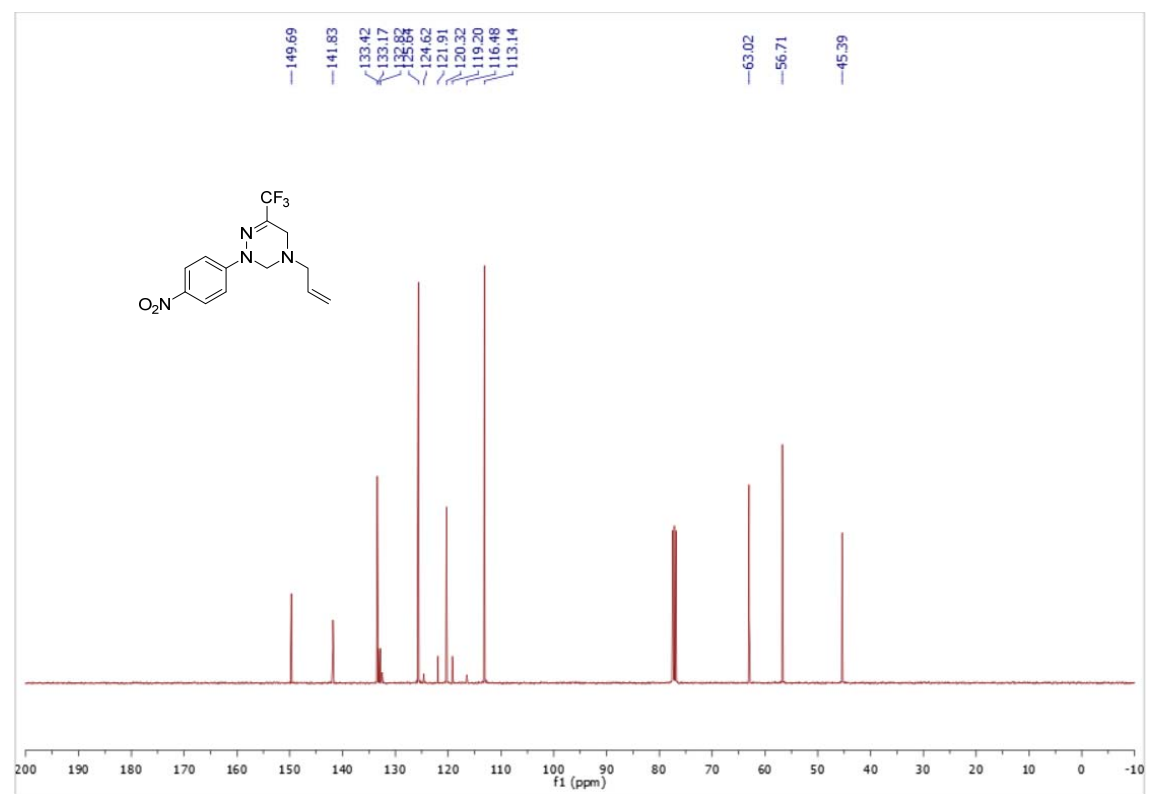

Compound 5b

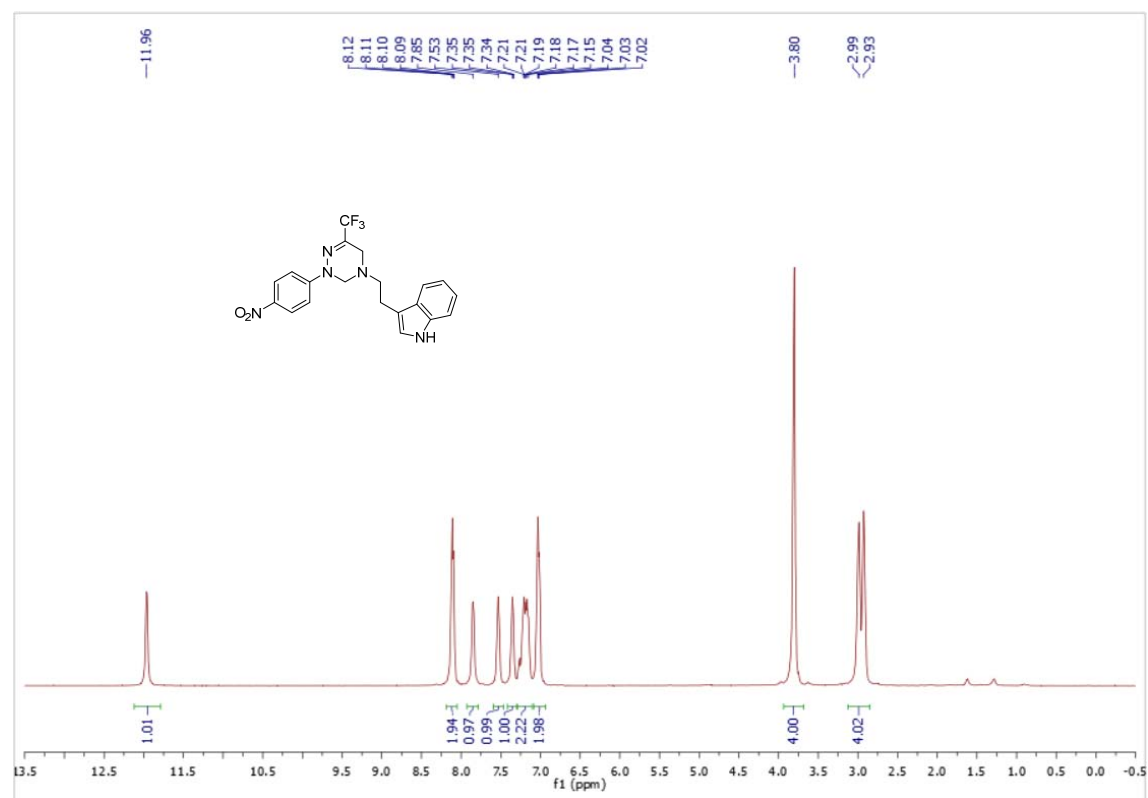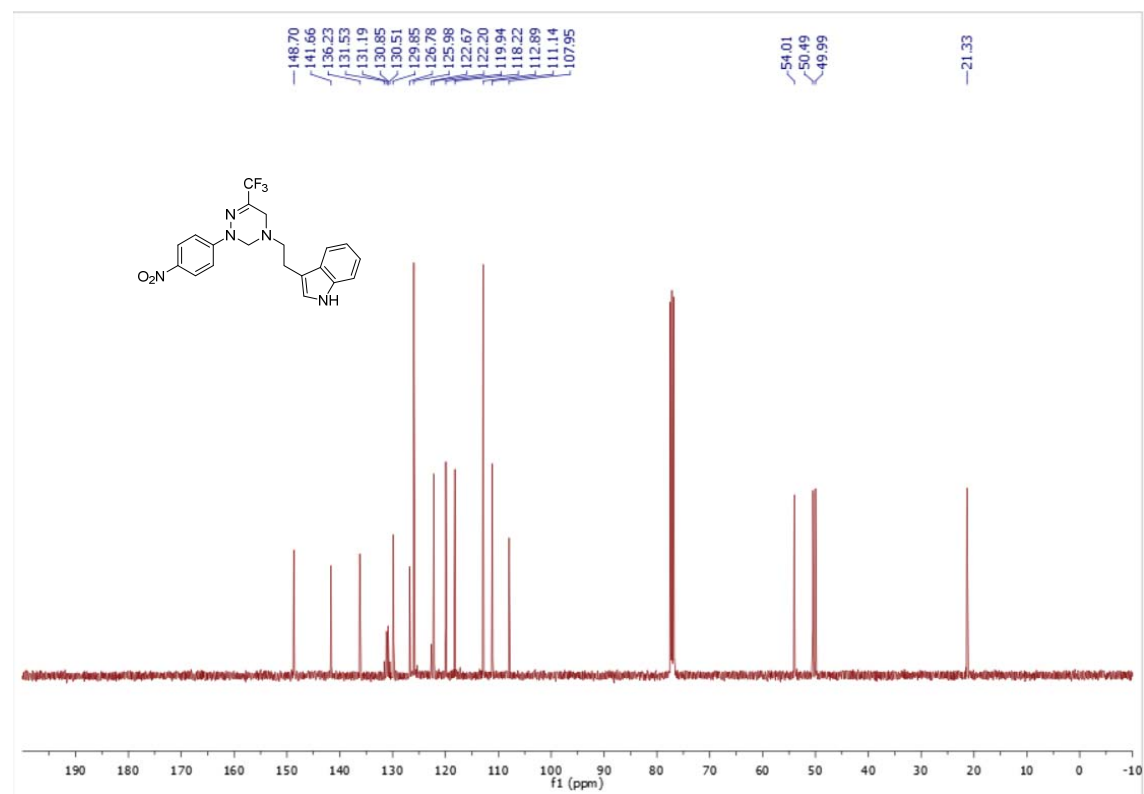

Compound 5c

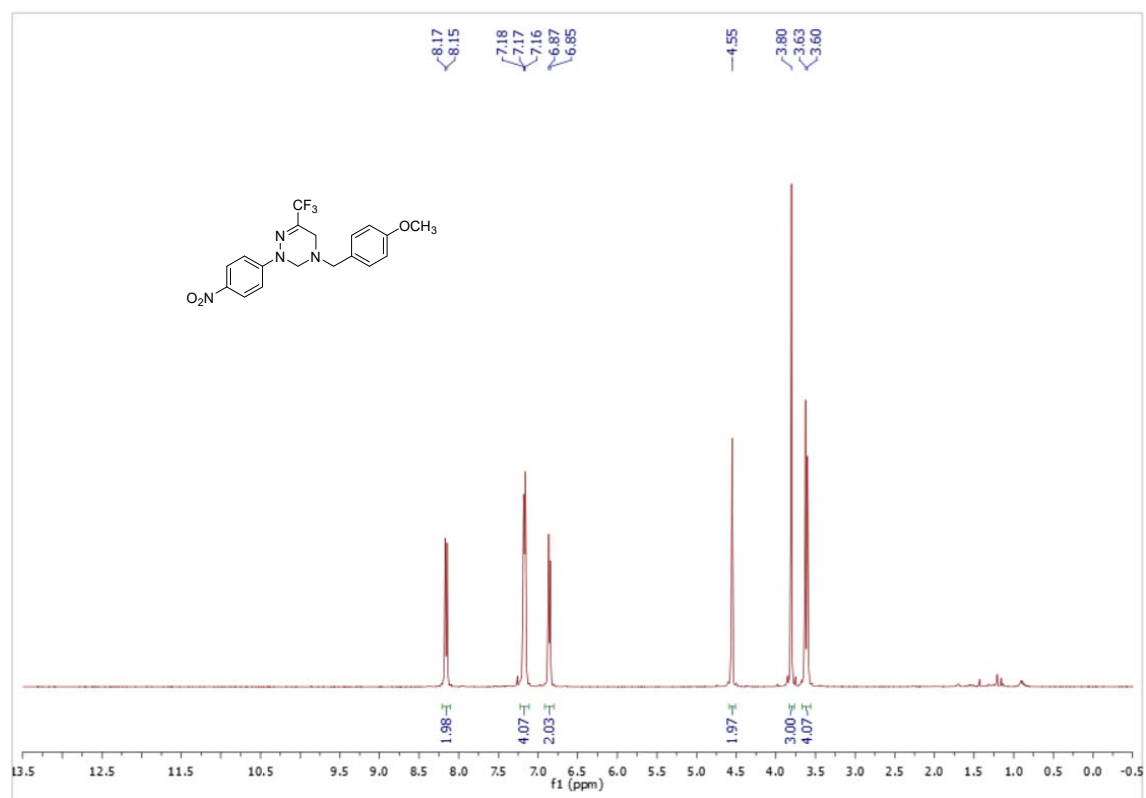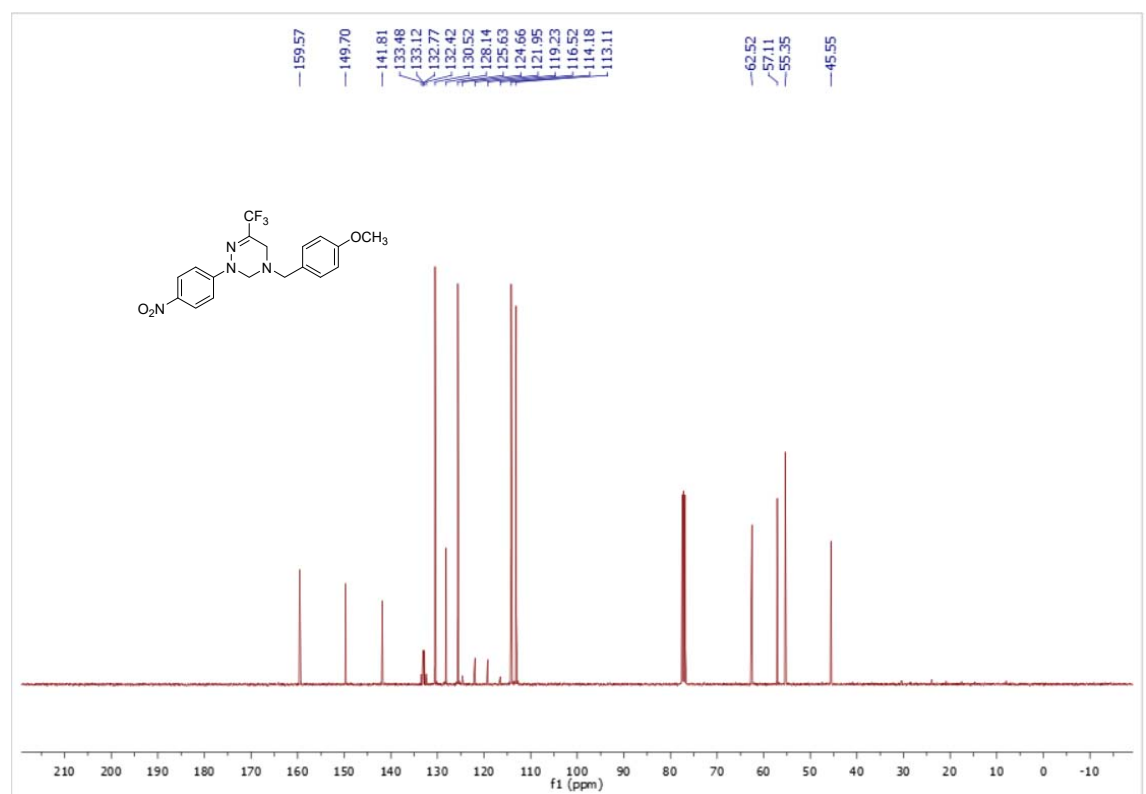

Compound 7a

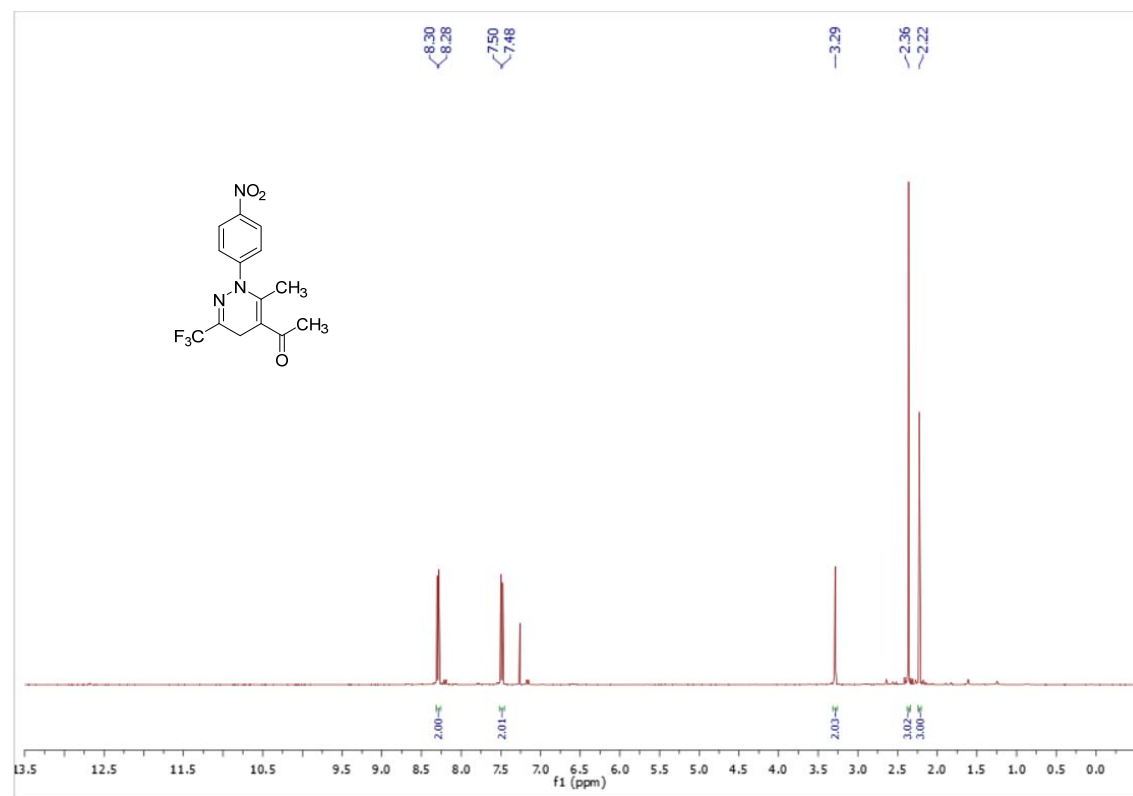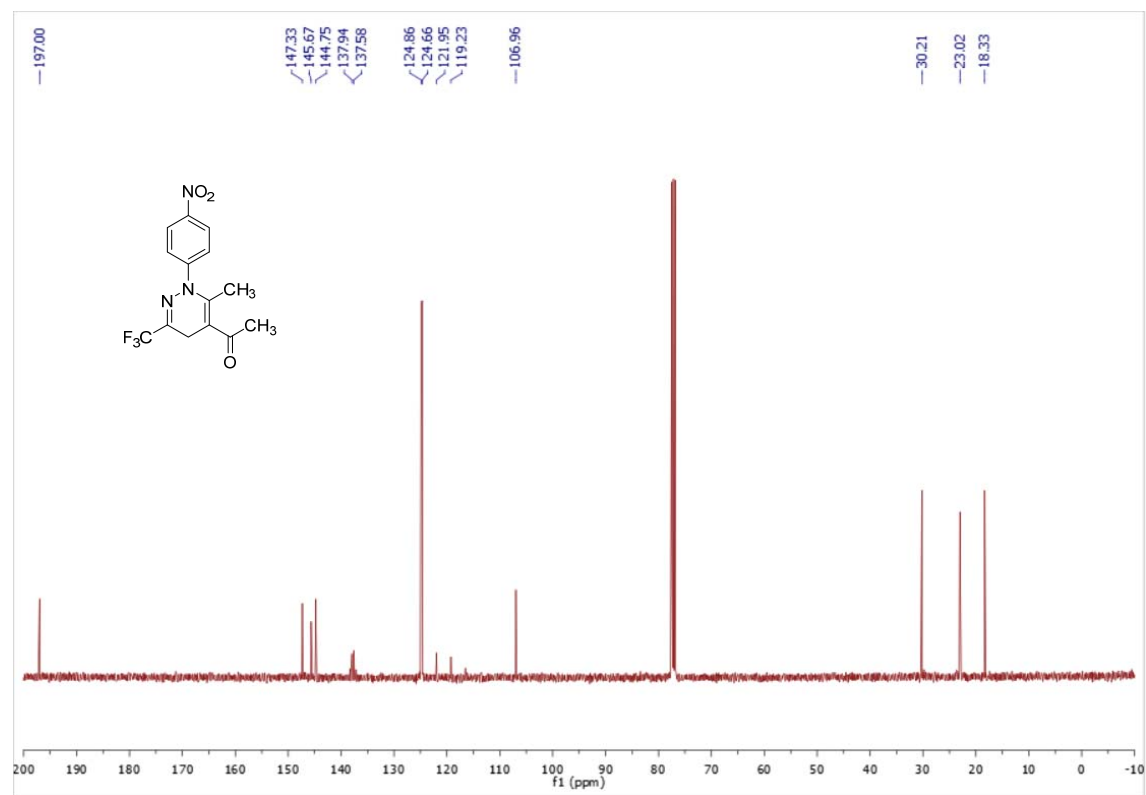

Compound 7b

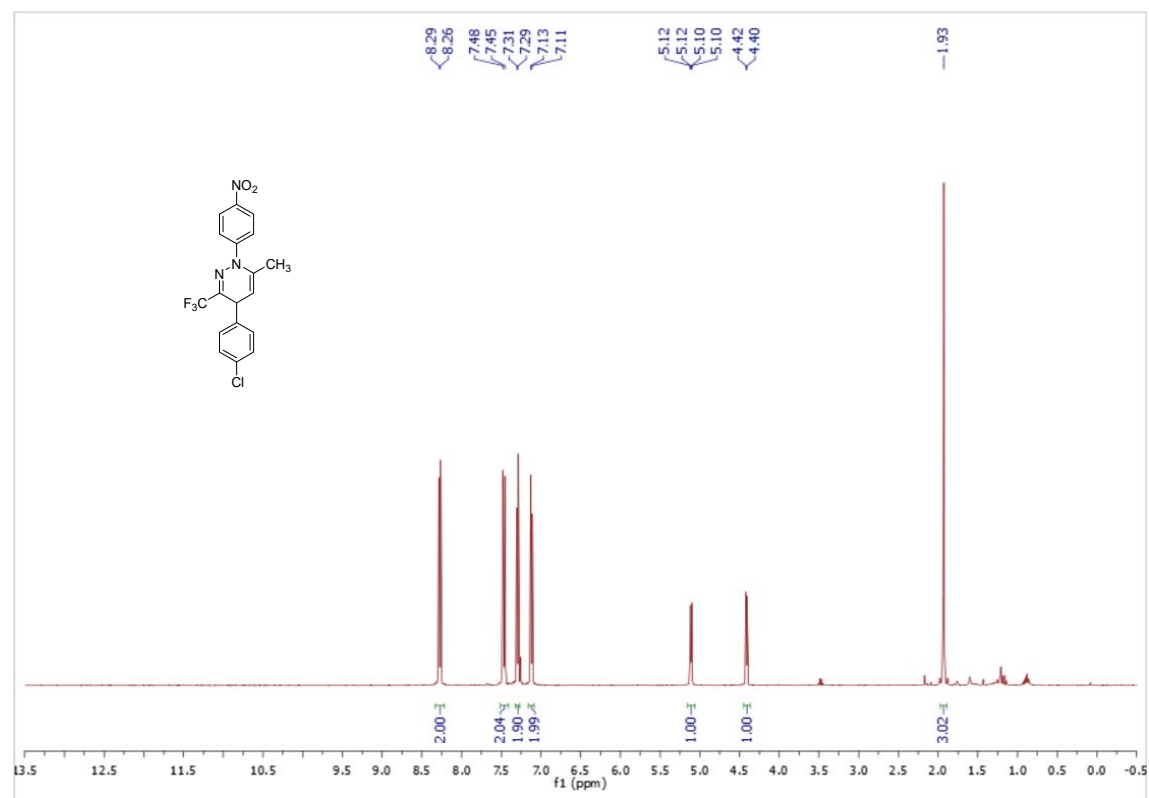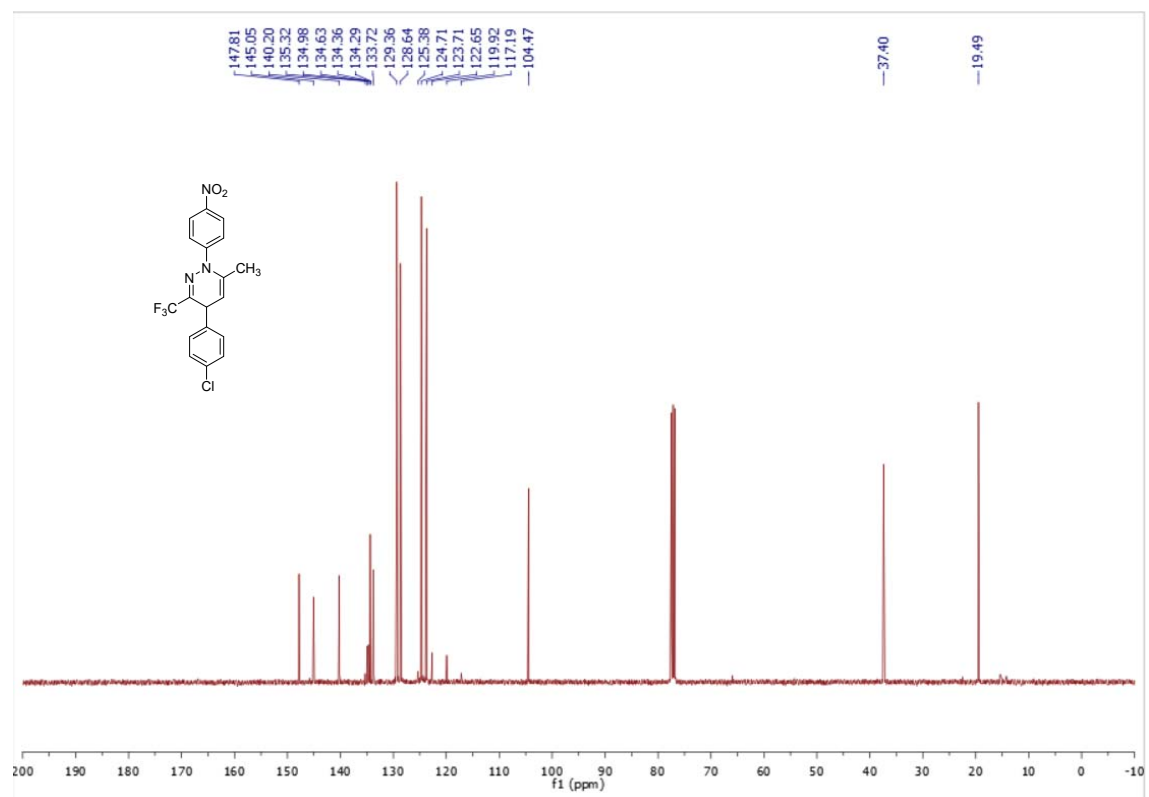

Compound 7c

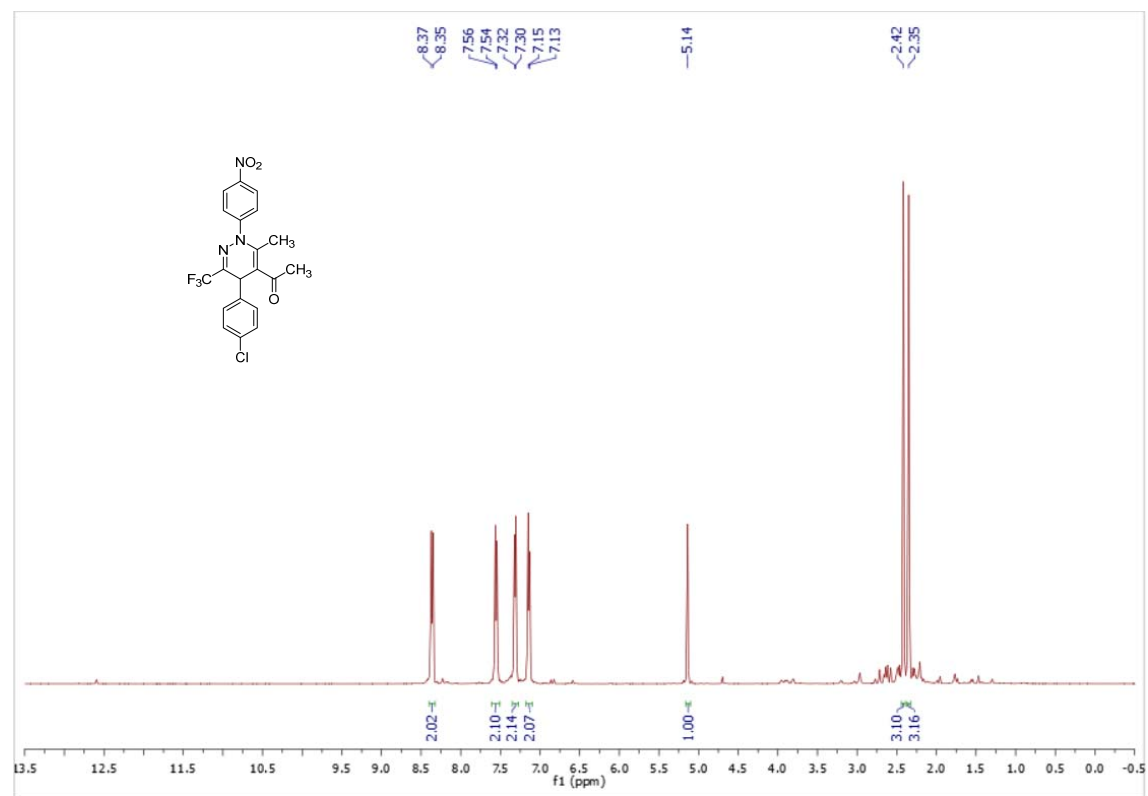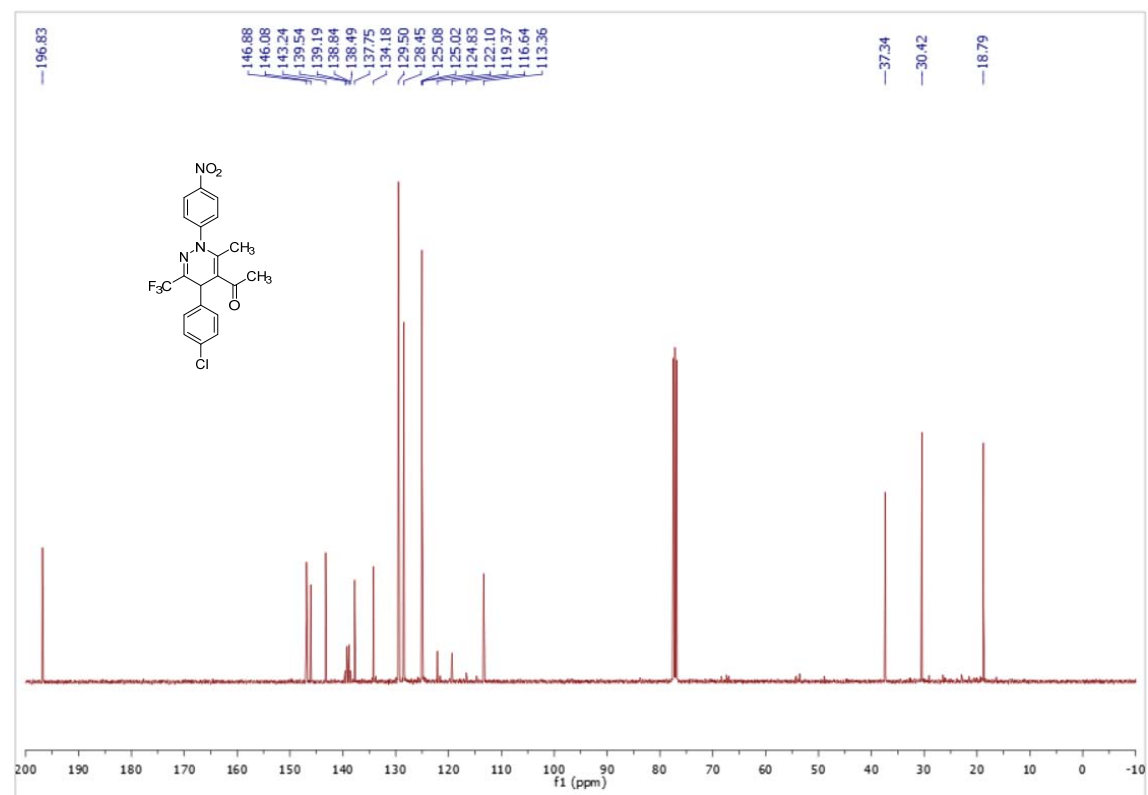

Compound 7d

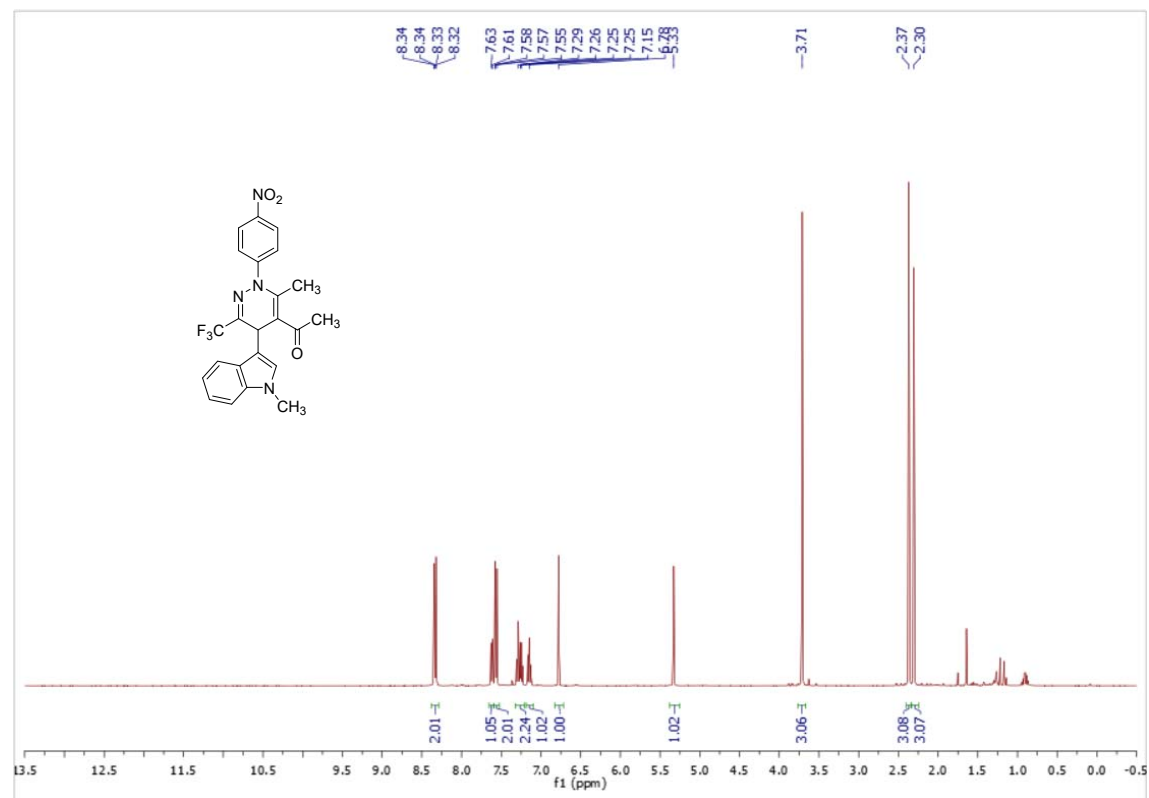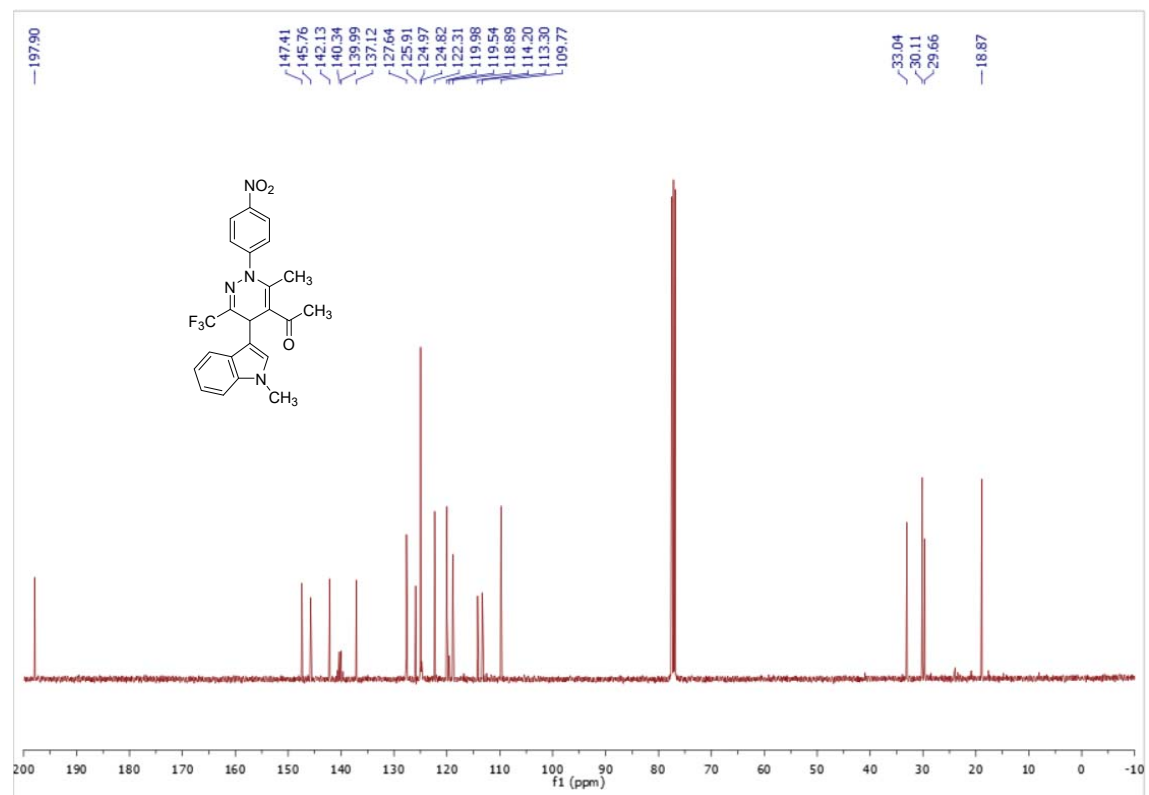

Compound 7e

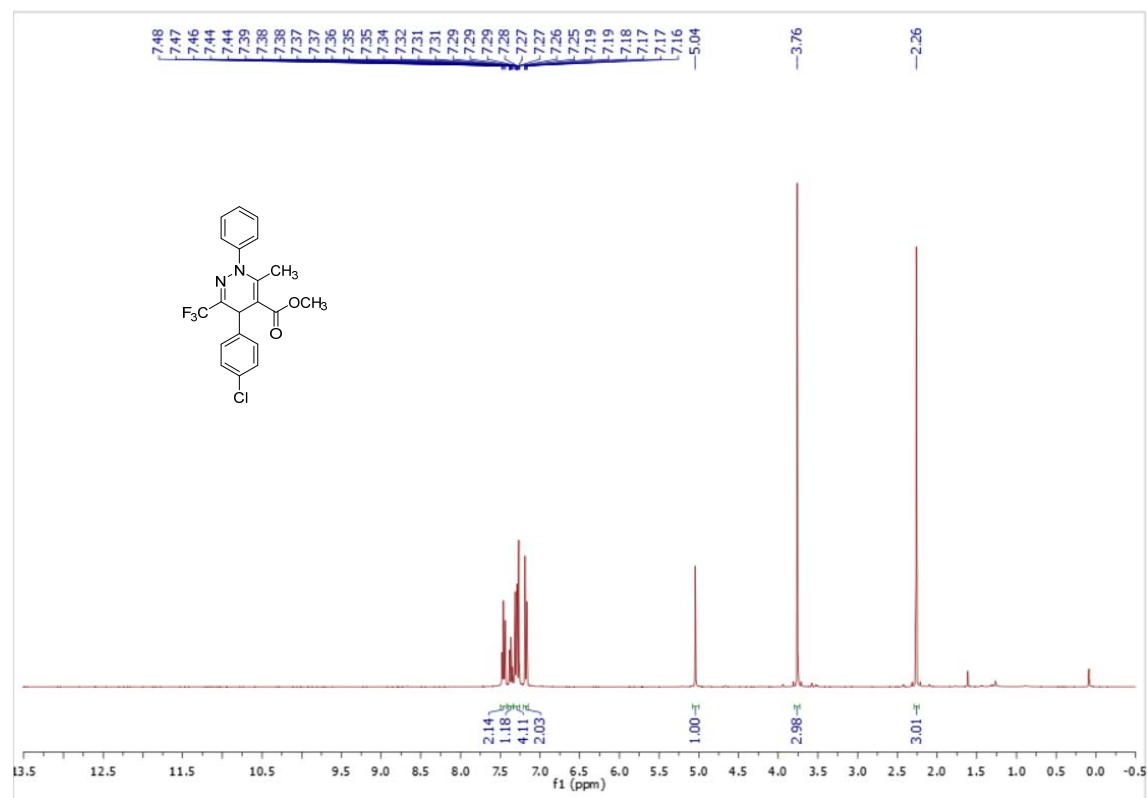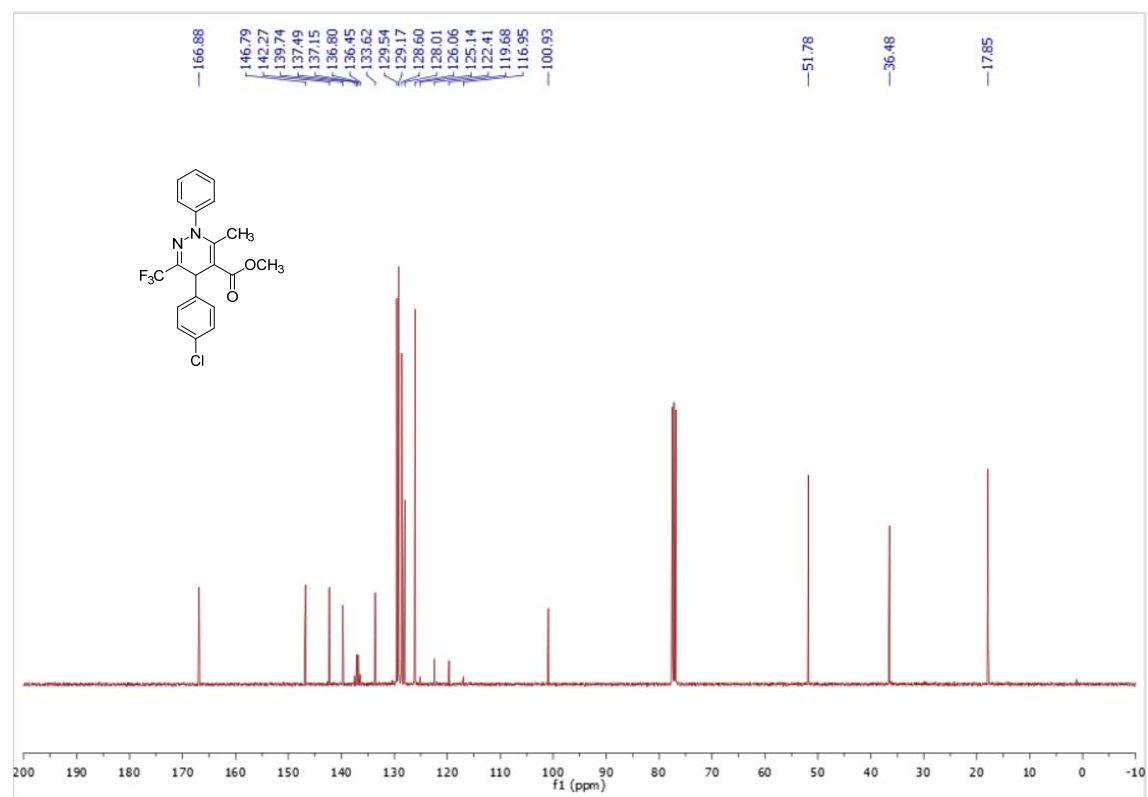



Compound **7f**

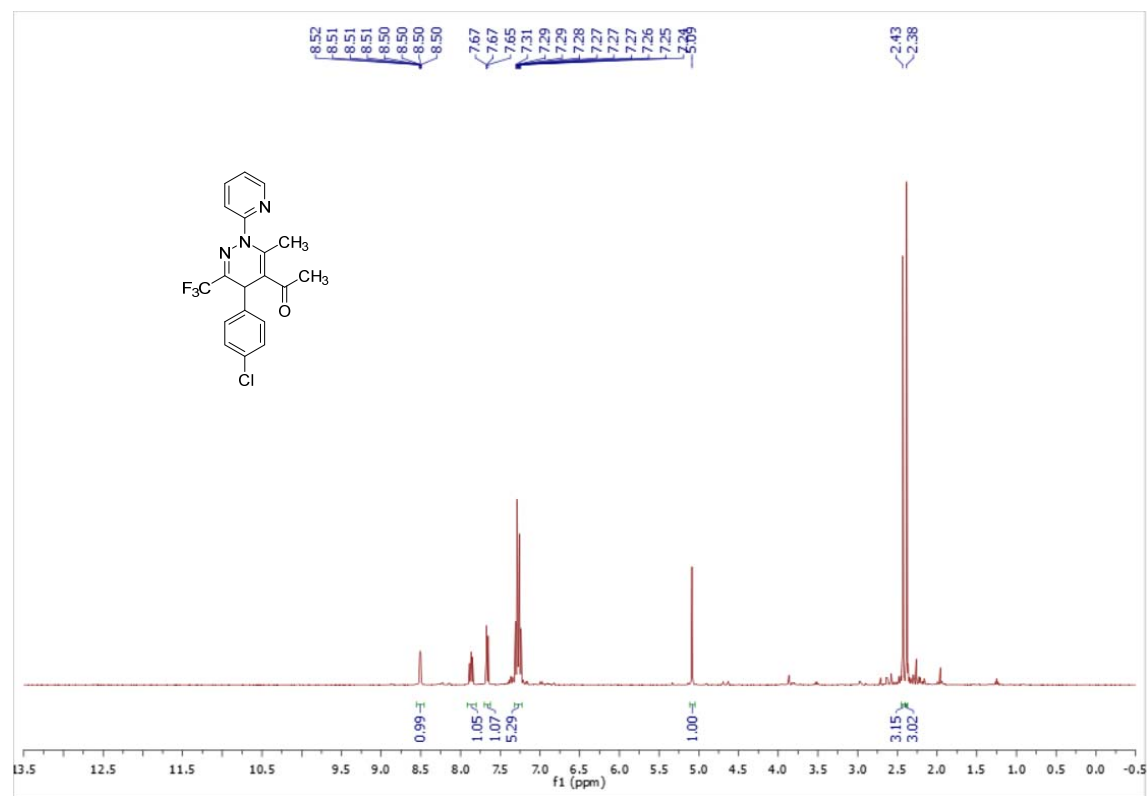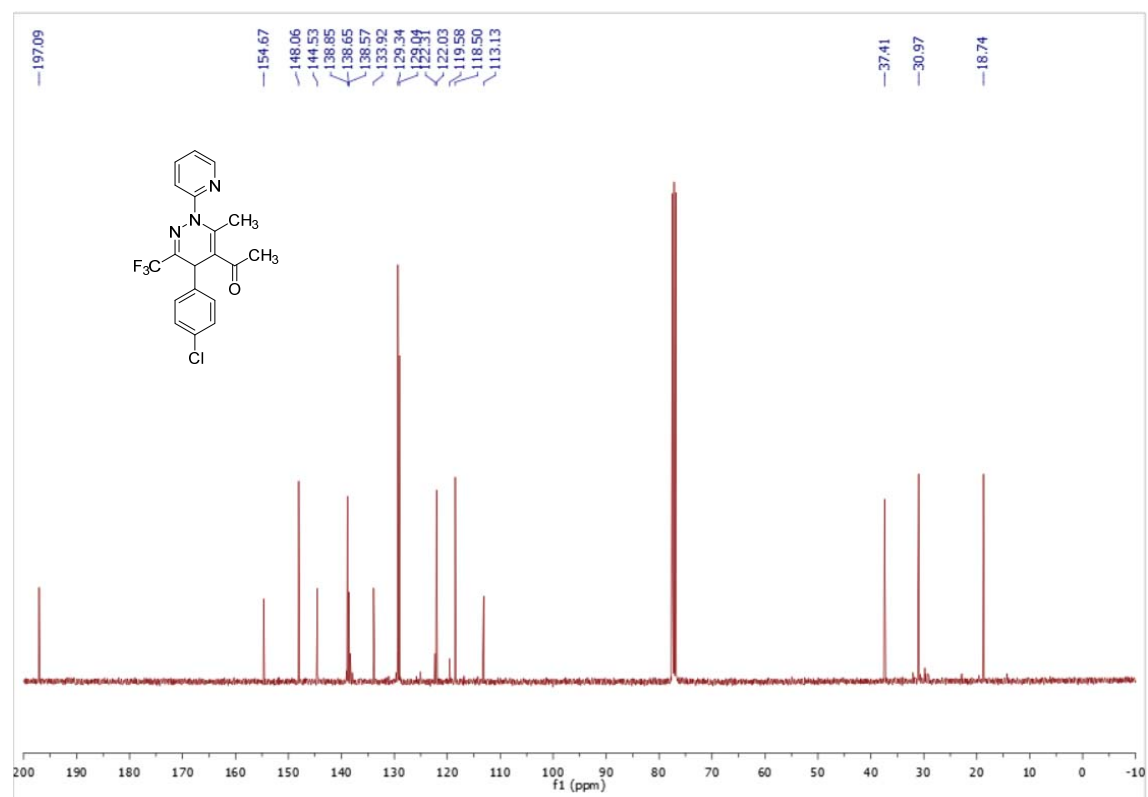

Compound **7g**

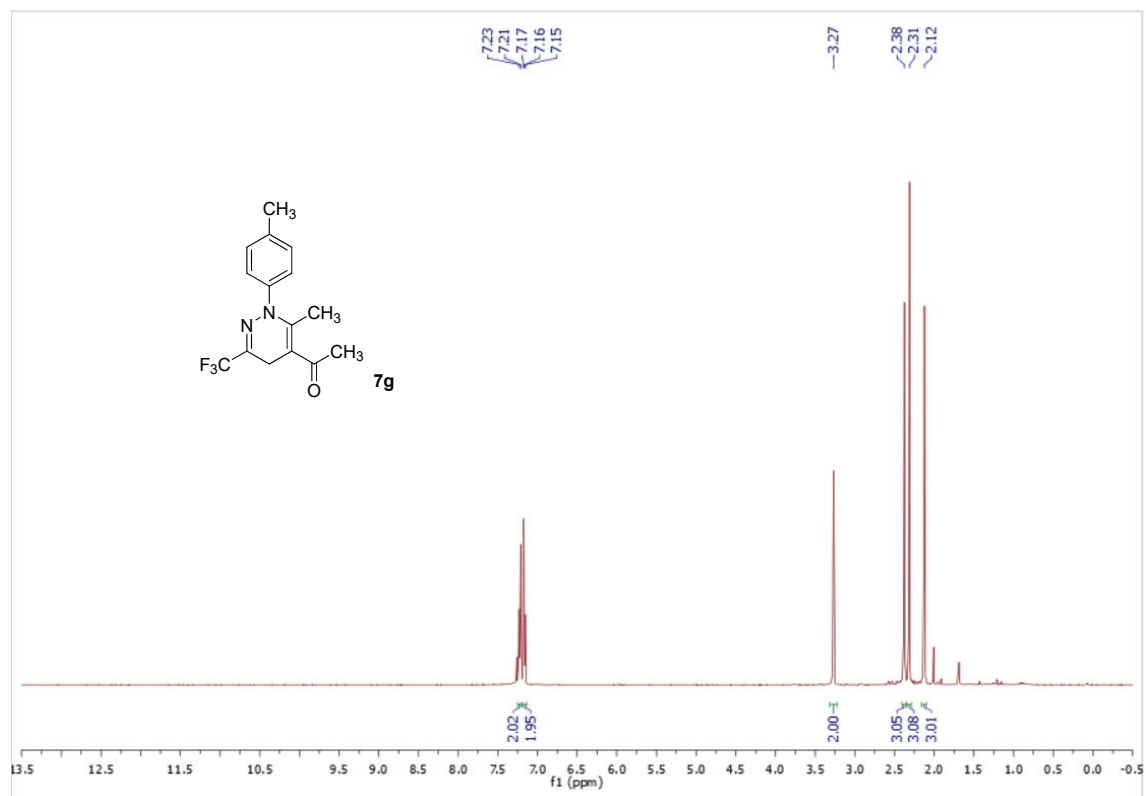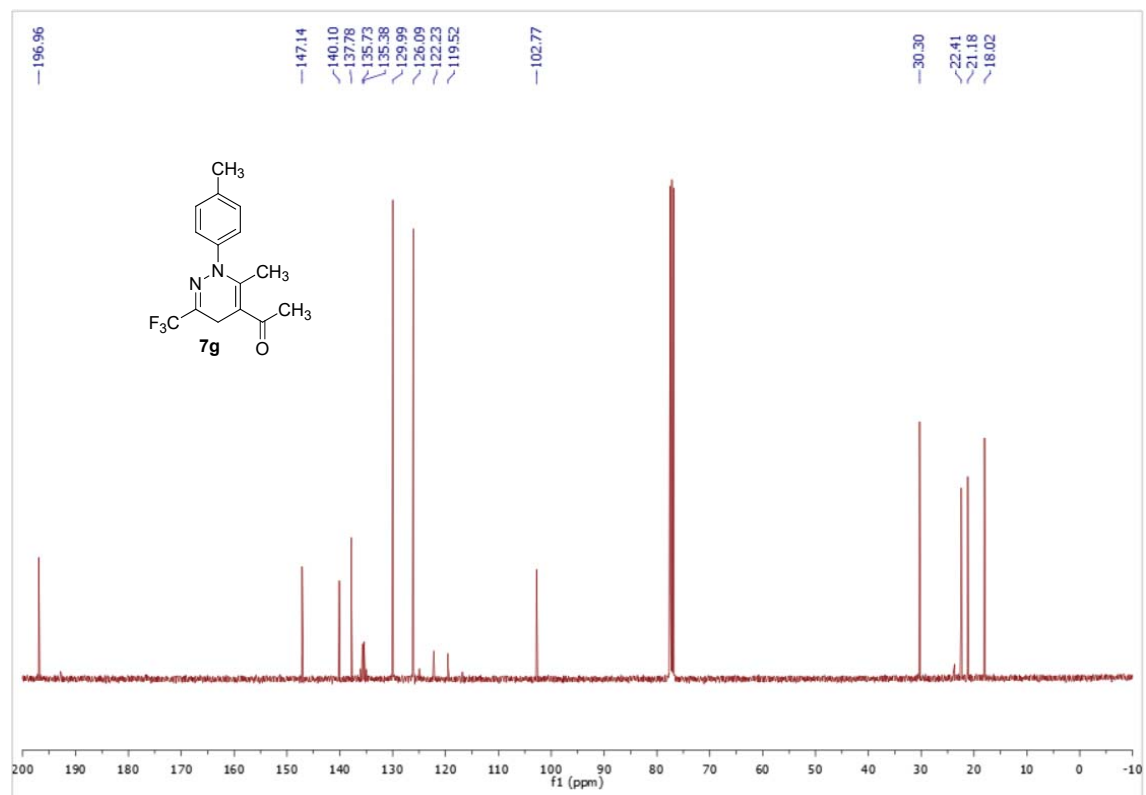

Compound **7h**

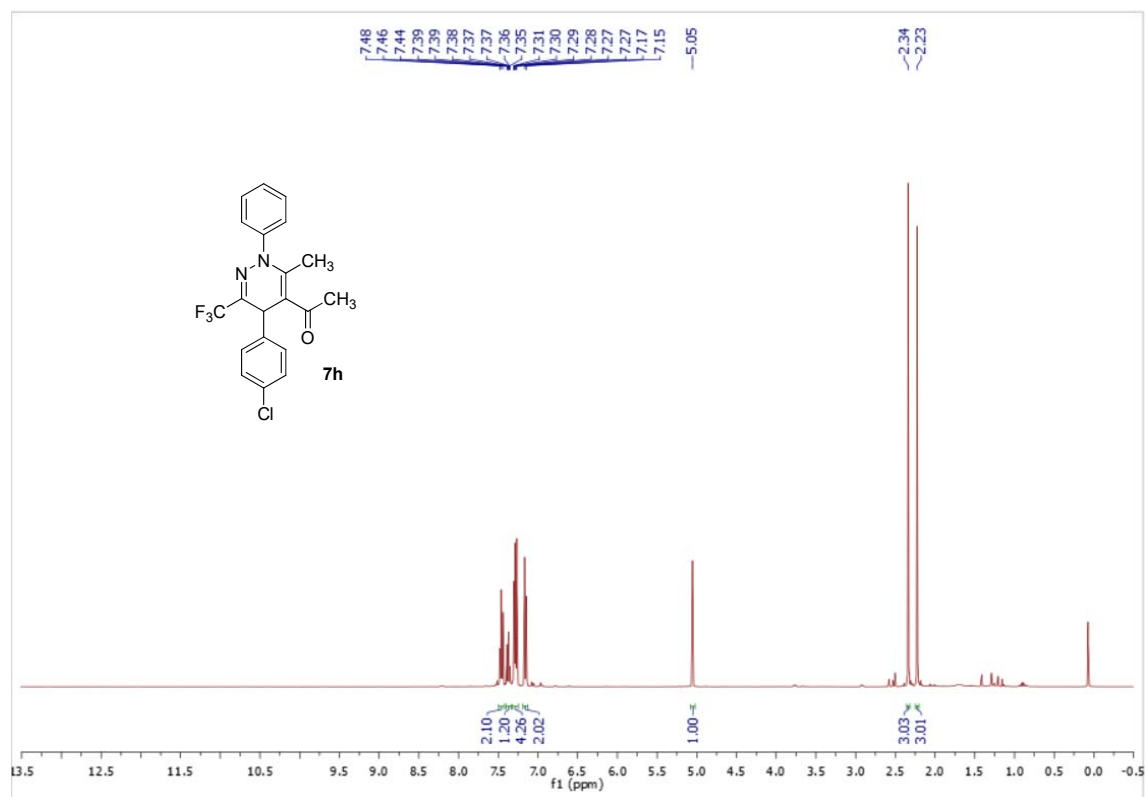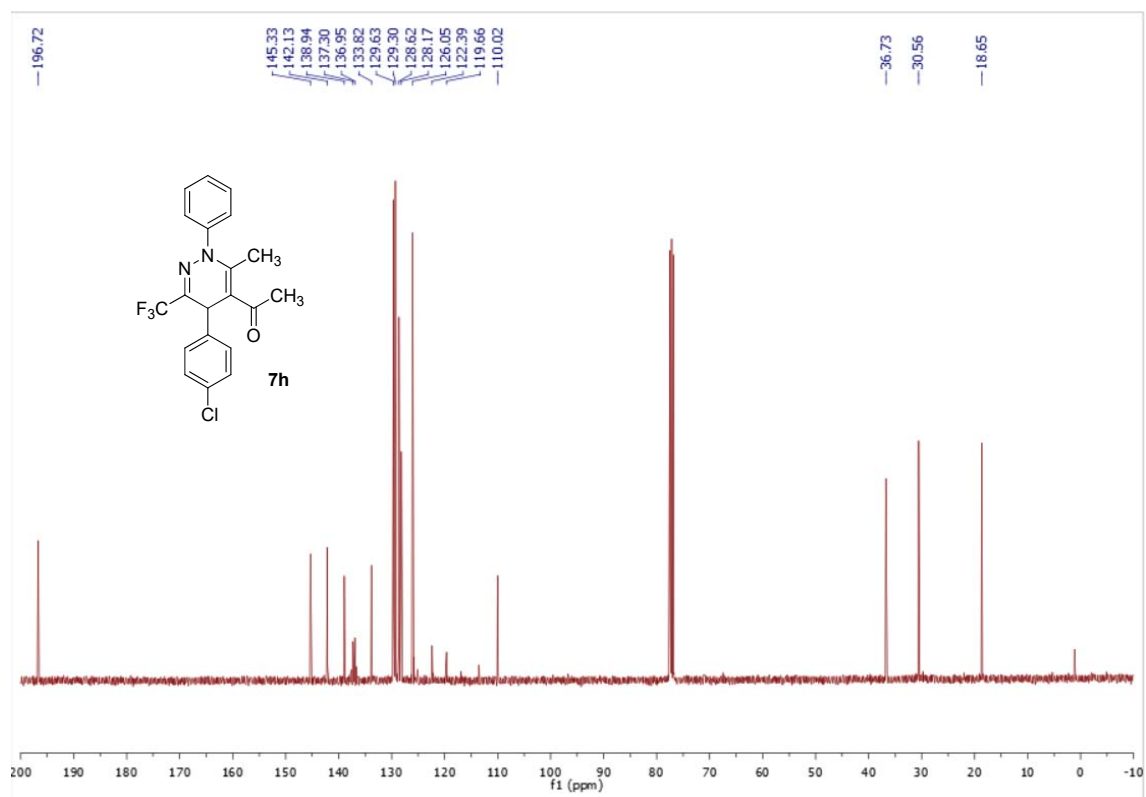

Compound **7i**

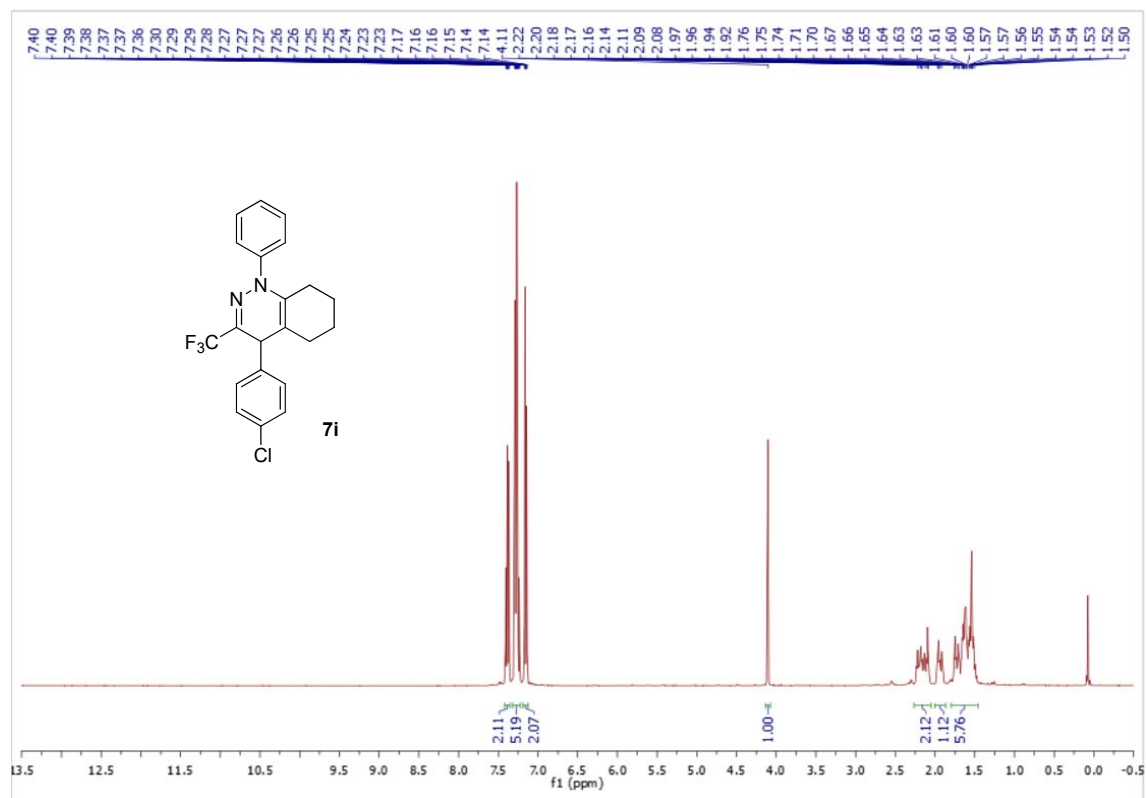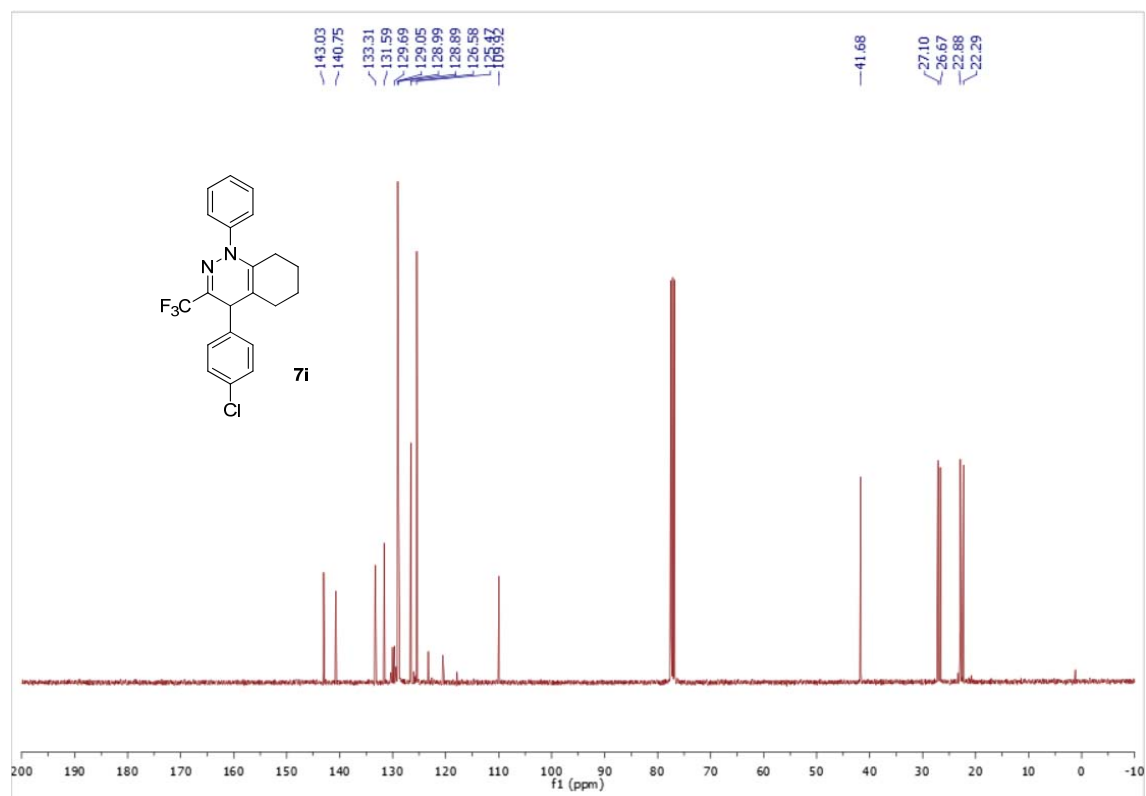

Compound **7j**

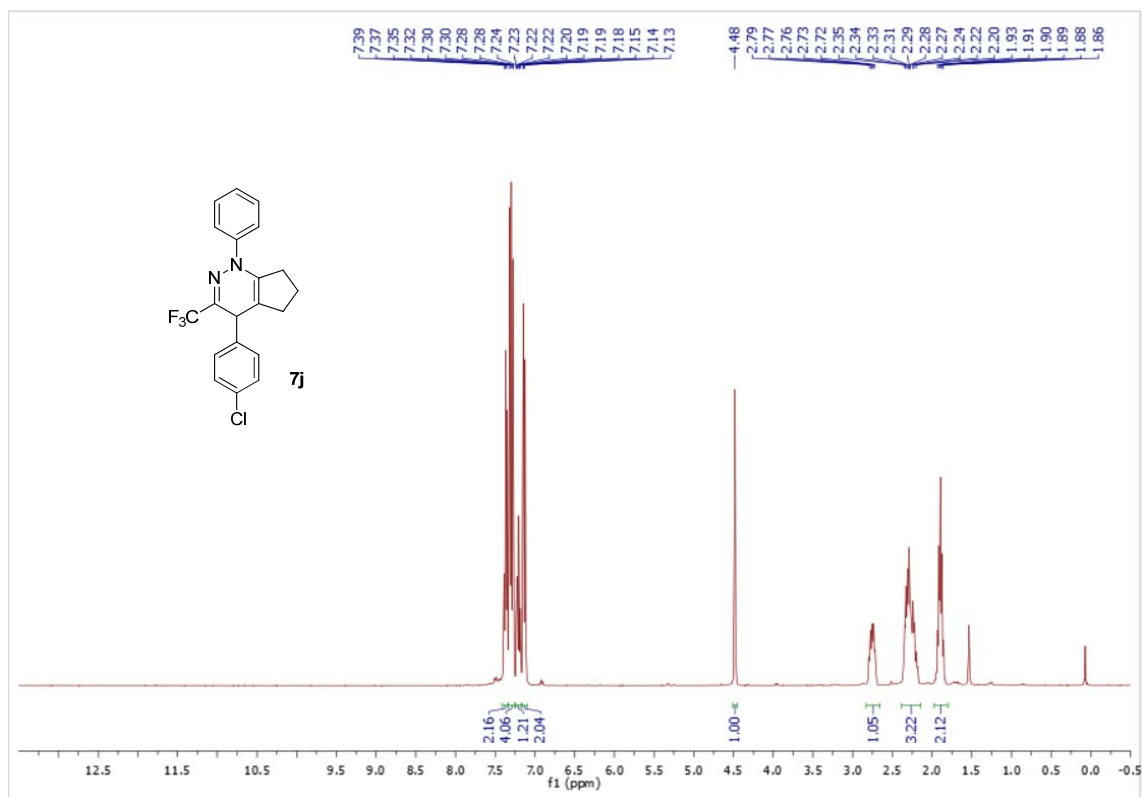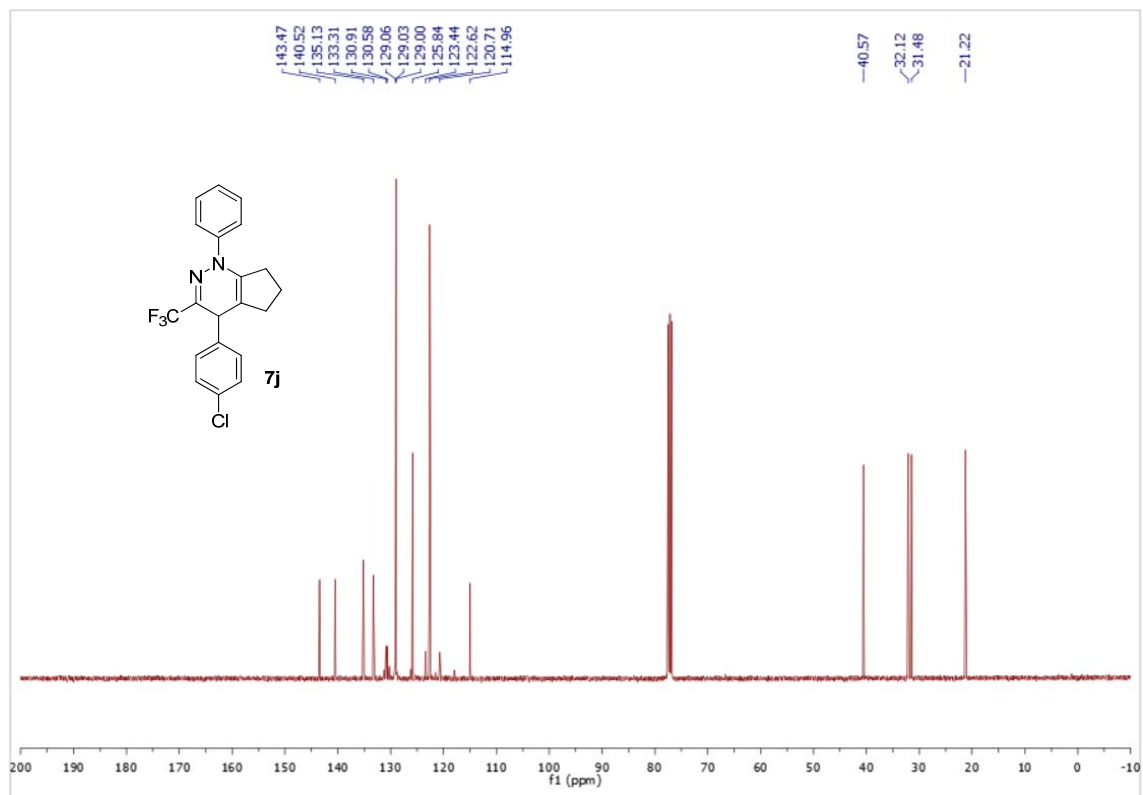

Supplement: c7ob02840g1.pdf [file c7ob02840g1.pdf]
